1 **Running title: Herbivore Population Dynamics in Ngorongoro Crater, Tanzania**

2

3 **Title: Long-Term historical and Projected Herbivore Population Dynamics in Ngorongoro**  
4 **Crater, Tanzania**

5

6 Patricia D. Moehlman<sup>1</sup>, Joseph O. Ogutu<sup>2\*</sup> Hans-Peter Piepho<sup>2</sup>, Victor Runyoro<sup>3</sup>, Mike  
7 Coughenour<sup>4</sup>, Randall Boone<sup>5</sup>

8

9 <sup>1</sup>IUCN/SSC Equid Specialist Group. Arusha, PO Box 2031, Arusha, Tanzania.

10 <sup>2</sup>University of Hohenheim, Institute for Crop Science-340, 70599 Stuttgart, Germany

11 <sup>3</sup> Environmental Reliance Consultants Limited. Arusha City Complex Building, P.O Box 16581,  
12 Arusha, Tanzania.

13 <sup>4</sup>Colorado State University, Department of Ecosystem Science and Sustainability, Fort Collins,  
14 USA

15 <sup>5</sup>Colorado State University, Natural Resource Ecology Laboratory, Fort Collins, USA

16

17 Patricia D. Moehlman: [pdbmf@aol.com](mailto:pdbmf@aol.com)

18 Joseph O. Ogutu: [jogutu2007@gmail.com](mailto:jogutu2007@gmail.com)

19 Hans-Peter Piepho: [Hans-Peter.Piepho@uni-hohenheim.de](mailto:Hans-Peter.Piepho@uni-hohenheim.de)

20 Victor A. Runyoro: [vrunyoro@yahoo.com](mailto:vrunyoro@yahoo.com)

21 Mike B. Coughenour: [Michael.Coughenour@colostate.edu](mailto:Michael.Coughenour@colostate.edu)

22 Randall Boone: [Randall.Boone@colostate.edu](mailto:Randall.Boone@colostate.edu)

23

24 \*Corresponding author:

25 Current Address: Institute for Crop Science-340, 70599 Stuttgart, Germany;

26 Tel: +49-711-459 23022; Fax: +49-711-459-24345;

27 E-mail: [jogutu2007@gmail.com](mailto:jogutu2007@gmail.com)

28

29 **Contribution information:** All the authors contributed to the analysis and interpretation of the  
30 data, drafting the article or revising it critically for important intellectual content. All authors  
31 read and approved the manuscript.

32

33 **Abstract**

34

35 The Ngorongoro Crater is an intact caldera with an area of approximately 310 km<sup>2</sup>. Long term  
36 records on herbivore populations, vegetation and rainfall made it possible to analyze historic and  
37 project future herbivore population dynamics. In 1974 there was a perturbation in that resident  
38 Maasai and their livestock were removed from the Crater. Vegetation structure changed in 1967  
39 from predominately short grassland to mid and tall grasses dominating in 1995. Even with a  
40 change in grassland structure, total herbivore biomass remained relatively stable from 1963 to  
41 2012, implying that the crater has a stable multi-herbivore community. However, in 1974,  
42 Maasai pastoralists were removed from the Ngorongoro Crater and there were significant  
43 changes in population trends for some herbivore species. Buffalo, elephant and ostrich numbers  
44 increased significantly during 1974-2012. The zebra population was stable from 1963 to 2012  
45 whereas numbers of other eight species declined substantially between 1974 and 2012 relative to  
46 their peak numbers during 1974-1976. Numbers of Grant's and Thomson's gazelles, eland,

47 kongoni, waterbuck (wet season only) declined significantly in the Crater in both seasons after  
48 1974. Wildebeest numbers decreased in the Crater between 1974 and 2012 but this decrease was  
49 not statistically significant. In addition, some herbivore species were consistently more abundant  
50 inside the Crater during the wet than the dry season. This pattern was most evident for the large  
51 herbivore species requiring bulk forage, comprising buffalo, eland, and elephant. Analyses of  
52 rainfall indicated that there was a persistent annual cycle of 4.83 years. Herbivore population size  
53 was correlated with rainfall in both the wet and dry seasons. The relationships established  
54 between the time series of historic animal counts in the wet and dry seasons and lagged wet and  
55 dry season rainfall series were used to forecast the likely future trajectories of the wet and dry  
56 season population size for each species under three alternative climate change scenarios.

57  
58 **Key words:** Wildlife; ungulates; wildlife conservation; population trends; population dynamics;  
59 population status; Population modelling; climate change and variability; Climate change  
60 Scenarios; RCP 2.6; RCP 4.5; RCP 8.5; rainfall; temperature; protected areas, Ngorongoro  
61 Crater, Ngorongoro Conservation Area, Serengeti-Ngorongoro Ecosystem; African savannas

## 62 63 **Introduction**

64 The Ngorongoro Crater, Tanzania is known world-wide for the abundance and diversity of its  
65 wildlife. It is situated in the Crater Highlands and is linked both to this area and the Serengeti  
66 Plains by the seasonal migration of several herbivores [1,2] and the emigration and immigration  
67 of large carnivores [4-8].

68

69 Since 1963, the herbivore population of Ngorongoro Crater has been monitored by the  
70 Ngorongoro Conservation Area Authority (NCAA), The College of African Wildlife  
71 Management and research scientists [1-3,9-12]. Since 1978, the Ngorongoro Ecological  
72 Monitoring Program has been responsible for conducting the wet and dry season censuses. The  
73 complete data set covers a period of 50 years (1963-2012). This data set makes it possible to  
74 assess long-term population trends and the stability of this multi-species wild herbivore  
75 community.

76  
77 Earlier analyses indicated that the eviction of Maasai, the removal of their livestock and changes  
78 in rangeland management correlated with complex changes in vegetation composition and  
79 structure and wild herbivore populations. Previous papers have hypothesized that the removal of  
80 the Maasai pastoralists was a key factor in changes observed in herbivore populations. Pastoral  
81 pasture management may have affected vegetation structure and species composition [12,13].

82  
83 This paper further examines the hypothesis that the removal of the Maasai and their livestock  
84 from the Crater in 1974 affected the plant structure in the crater and the population dynamics of  
85 the resident wild herbivore species depending on their life-history traits (body size, gut  
86 morphology) and life-history strategies (feeding style, foraging style, and movement patterns).

87  
88 In addition we examine the hypothesis that rainfall variation influences the herbivore population  
89 dynamics and density, differentiated by life-history traits and strategies. Extreme rainfall in the  
90 Crater, which waterlogs large parts of the Crater should adversely affect wildlife, just like  
91 droughts, if large parts of the Crater become waterlogged. Additionally, high rainfall promotes

92 excessive grass growth and dilutes plant nutrients, hence reducing vegetation quality for  
93 herbivores.

94

95 Relationships established between historic population abundance and historic rainfall are used to  
96 project the impacts of three different future rainfall scenarios on wild herbivore population  
97 dynamics to 2100.

98

## 99 **Methods**

### 100 **Study Area**

101 Ngorongoro Crater, Tanzania is known world-wide for the abundance and diversity of its  
102 wildlife. The crater (3°10' S, 35° 35' E) is a large intact caldera with an area of approximately  
103 310 km<sup>2</sup>. The floor of the crater is about 250 km<sup>2</sup> (1,700 m above sea level) and the sides rise  
104 steeply 500 meters to the rim. The geology, soils and vegetation of the crater were described by  
105 Herlocker and Dirschl [14] and Anderson and Herlocker [15]. The crater has the largest  
106 catchment basin in the Ngorongoro Highlands [16] and receives water from Lalratati and Edeani  
107 streams and Lerai spring from Oldeani Mountain to the south. Seneto spring provides water to  
108 Seneto swamp and Lake Magadi from the southwest. Olmoti Crater provides runoff to Laawanay  
109 and Lemunga rivers in the north, which supply Mandusi swamp and Lake Magadi. Ljoro Nyuki  
110 river, in the northeast provides water to Gorigor swamp. Ngaitokitok spring in the eastern part of  
111 the crater also supplies Gorigor swamp and Lake Magadi. Soil characteristics and drainage affect  
112 vegetation species and during the dry season soil moisture is dependent on the crater's catchment  
113 system (Fig. 1). The wildlife of Ngorongoro Crater has had a protected status since 1921. In  
114 1974, resident Maasai pastoralists, their bomas and livestock were removed from the crater

115 [10,17]. The area has been administered by the Ngorongoro Conservation Unit since 1959 and by  
116 the Ngorongoro Conservation Area Authority since 1975 as part of a protected multiple land use  
117 area (8,292 km<sup>2</sup>).

118

### 119 **Wild herbivore populations**

120 Long term data sets were available for eleven mammalian herbivores, i.e. Wildebeest  
121 (*Connochaetes taurinus*), Plains Zebra (*Equus quagga*), Cape Buffalo (*Syncerus caffer*),  
122 Thomson's gazelle (*Eudorcas thomsonii*), Grant's gazelle (*Nanger granti*), Eland (*Tragelaphus*  
123 *oryx*), Kongoni (*Alcelaphus buselaphus*), Waterbuck (*Kobus ellipsiprymnus*), Warthog  
124 (*Phacochoerus aethiopicus*), Elephant (*Loxodonta africana*) and Black Rhino (*Diceros bicornis*)  
125 and one bird, the Ostrich (*Struthio camelus*).

126

127 Zebra are mid-sized herbivores, but they are non-ruminants. Hence they are not limited by a  
128 four-chambered stomach system and can opt to consume larger amounts of higher fiber (lower  
129 quality) grasses to meet their nutritional requirements [18].

130

131 Buffalo are large bodied ruminants and although they require a larger amount of food per  
132 individual, the quality can be lower and they can tolerate a higher proportion of fiber in their diet  
133 [18,19]. Buffalo prefer longer grass and select for a high ratio of leaf to stem [20].

134

135 The herbivores were classified into functional categories, i.e., grazers (Thomson's gazelle,  
136 kongoni, wildebeest, eland, buffalo, and zebra) and mixed browsers/grazers (Grant's gazelle,

137 waterbuck, black rhino and elephant) [21-27]. The ostrich is primarily a herbivore, but will also  
138 eat invertebrates and occasionally rodents [28].

139

#### 140 **Herbivore Total Counts**

141 Since 1963, the herbivore population of Ngorongoro Crater has been monitored by the  
142 Ngorongoro Conservation Area Authority (NCAA), The College of African Wildlife  
143 Management and research scientists [1-3,9-12]. Since 1987, the Ngorongoro Ecological  
144 Monitoring Program has been responsible for conducting the wet and dry season censuses. This  
145 data set makes it possible to assess long-term population trends and the stability of this multi-  
146 species wild herbivore community. Here, we consider the data set covering a period of 50 years  
147 (1963-2012).

148

149 Total counts of large mammals in the wet and dry seasons have been done in the crater since the  
150 1963. The floor of the crater was divided into six blocks (Fig 1) that cover the entire area except  
151 for inaccessible areas, i.e., Lake Magadi, Lerai Forest and the Mandusi and Gorigor swamps. The  
152 ground censuses are done by one team per block composed of one driver, one observer and one  
153 recorder in a four-wheel drive vehicle driving along line transects that are one kilometer apart.  
154 Since 1987 each of the six teams has been supplied with a 1:50,000 map marked with the  
155 transects, a compass, binoculars and a mechanical counter. Each block takes six to eight hours to  
156 complete and all blocks are censused simultaneously [12, 29-34]. Unpublished records of NCAA  
157 and NEMP 1963 - 2012 provide most of the seasonal data on animal numbers.

158

159 From 1981 to 1985 there were no censuses. In 1986 the total counts were resumed and strip  
160 counts were used for counting gazelles and warthog and analyzed with Jolly's method 2 [35].  
161 Strip counts were discontinued after 1989 because of unacceptably large confidence limits and  
162 the difficulty of maintaining absolutely straight transects in the wet season. Data from strip  
163 counts were not used in the analyses. However, 'transects' are still used to ensure complete  
164 coverage of each block. Total aerial counts were conducted in 1964, 1965, 1966, 1977, 1978 and  
165 1988 [12]. A systematic reconnaissance flight count was done in 1980 which included warthogs  
166 for the first time [36]. Total counts of warthogs started in 1986 [12]. The count totals for the 12  
167 most common large herbivore species for the Ngorongoro Crater during 1963-2012 are provided  
168 in S1 Data. The same data set with the missing counts imputed using a state space model is  
169 provided in S2 Data.

170  
171 Total biomass for the wet and dry seasons for each year were calculated using unit weights in  
172 Coe et al. [37]. Biomass was calculated separately for each species and season. The fact that  
173 black rhinos, elephants and warthogs move into the forest at the edge of the crater and into Lerai  
174 forest make them more difficult to count and may affect their contribution to biomass.

175  
176 **Vegetation**

177 Changes in vegetation composition and structure were measured by digitizing and comparing  
178 vegetation maps that were done in 1966-67 and 1995 [14,38]. Maps were digitized in ArcGIS 9.1  
179 (ESRI, Redlands, California) and projected to UTM Zone 36, WGS 1984 datum. Attributes on  
180 the maps were digitized, and in both maps the plant height for primary and secondary canopy  
181 species was used to determine the presence of short, mid, mid-tall and tall grass structure.



182

183 Fires were suppressed from 1974, when the Maasai were removed, until 2001 [39]. Prescribed  
184 burning started in 2001. Transects were used to measure canopy height and biomass in kg/ha  
185 estimated by linear regression. Starting in 2001, areas with more than 4000 kg/ha were burned  
186 every year at the end of the dry season (September/October). It was recommended that 10-20%  
187 of the crater floor was burned on a rotational basis. Highest tick density occurred in the peak dry  
188 season (September/October) in the longest grass. Twenty-seven months after the start of  
189 prescribed burning, there was a significant decrease in tick density in burned areas. Short grass  
190 (<10 cm) areas with a fuel load of less than 4000 kg/ha appear to correlate with limited tick  
191 survival [39]. From 2002 to 2011 there was prescribed burning but no records were maintained.  
192 From 2012 to 2017 approximately 10 to 15 km<sup>2</sup> were burned each year in different areas. In  
193 2012-2015 burning was done in the northern and northeastern portion of the crater. In 2016 and  
194 2017 burning was conducted in the eastern and then the east central portion of the crater (Pers  
195 comm NCAA 2018).

196

### 197 **Rainfall**

198 Long-term rainfall data was not available for the crater floor. We therefore used monthly rainfall  
199 measured from 1964 to 2014 at Ngorongoro Headquarters on the southern rim of the crater. The  
200 rainfall recorded at the Ngorongoro Conservation Area Authority (NCAA) headquarters during  
201 1963-2014 is provided in S3 Data.

202

### 203 **Projection of rainfall and temperature**

204 Total monthly rainfall and average monthly minimum and maximum temperatures for  
205 Ngorongoro Crater were projected over the period 2013-2100 based on regional downscaled  
206 climate model data sets from the Coordinated Regional Climate Downscaling Experiment  
207 (CORDEX). Downscaling is done using multiple regional climate models as well as statistical  
208 downscaling techniques. Three climate scenarios defined in terms of Representative  
209 Concentration Pathways (RCPs) were used to project rainfall and temperatures for the  
210 Ngorongoro Crater. The three RCPs are RCP2.6, RCP4.5 and RCP8.5 in which the numeric  
211 suffixes denote radiative forcings (global energy imbalances), measured in watts/m<sup>2</sup>, by the year  
212 2100. The RCP2.6 emission pathway (best case scenario) is representative for scenarios leading  
213 to very low greenhouse gas concentration levels [40]. RCP4.5 (intermediate scenario) is a  
214 stabilization scenario for which the total radiative forcing is stabilized before 2100 by  
215 employment of a range of technologies and strategies for reducing greenhouse gas emissions  
216 [41]. RCP8.5 (worst case scenario) is characterized by increasing greenhouse gas emission over  
217 time representative for scenarios leading to high greenhouse gas concentration levels [42].  
218 Rainfall, minimum and maximum temperature projections were made for a 50 × 50 km box  
219 defined by longitudes (34.97, 35.7) and latitudes (-3.38, -2.787).

220

## 221 **Ethics Statement**

222 All the animal counts in the Ngorongoro Crater were carried out as part of a long-term  
223 monitoring Program under the auspices of the Ngorongoro Conservation Area Authority  
224 (NCAA).

225

## 226 **Statistical modeling and analysis**

## 227 **Modeling trends in animal population size and biomass**

228 Time trends in count totals for all the 12 most common large herbivore species were modeled  
229 simultaneously using a multivariate semiparametric generalized linear mixed model assuming a  
230 negative binomial error distribution and a log-link function. The variance of the negative  
231 binomial distribution model  $\text{var}(y)$  was specified as a quadratic function of the mean ( $\mu$ ),  
232  $\text{var}(y) = \mu(1 + \mu/k)$ , where  $k$  is the scale parameter. The semi-parametric model is highly  
233 flexible and able to accommodate irregularly spaced, non-normal and overdispersed count data  
234 with many zeroes or missing values. The parametric part of the model contains only the main  
235 effect of animal species to allow direct estimation of the average population sizes for the  
236 different species in each season. The non-parametric part of the model contains two continuous  
237 random effects, each of which specifies a penalized spline variance-covariance structure. The  
238 first random spline effect fits a penalized cubic B-spline (P-spline, [43]) with a third-order  
239 difference penalty to random spline coefficients common to all the 12 species and therefore  
240 models the temporal trend shared by all the species. The second random spline effect fits a  
241 penalized cubic B-spline with random spline coefficients specific to each species and thus  
242 models the temporal trend unique to each species. Each random spline effect had 20 equally  
243 spaced interior knots placed on the running date of the surveys (1963, ..., 2012) plus three evenly  
244 spaced exterior knots placed at both the start date (1963) and end date (2012) of the surveys. De  
245 Boor [44] describes the precise computational and mathematical properties of B-splines. The  
246 specific smoothers we used derive from the automatic smoothers described in Ruppert, Wand  
247 and Carrol [45].

248

249 The full model contains three variance components to be estimated, corresponding to the random  
250 spline time trend common to all species, random spline effects for the time trend specific to each  
251 species and the scale parameter for the negative binomial distribution. The full trend model was  
252 fitted by the residual penalized quasi-likelihood (pseudo-likelihood) method [46] in the SAS  
253 GLIMMIX procedure [47]. More elaborate details on this approach to modelling animal  
254 population trends can be found in Ogutu et al. [48]. Separate trend models were fit to the wet and  
255 dry season count totals for simplicity. The denominator degrees of freedom for Wald-type F-tests  
256 were approximated using the method of Kenward and Roger [49]. Temporal trends in total  
257 biomass calculated using unit weights in Coe et al. [37] were similarly modeled, separately for  
258 each season.

259  
260 We used constructed spline effects to estimate and contrast population sizes for each species  
261 between 1964 versus 1974 when the Maasai and their livestock were evicted from the Crater and  
262 1974 versus 2012. The constructed spline effects consisted of a cubic B-spline basis with three  
263 equally spaced interior knots. A constructed regression spline effect expands the original time  
264 series of animal survey dates into a larger number of new variables (seven in this specific case).  
265 Each of the new variables is a univariate spline transformation. The constructed spline effects are  
266 special model effects, in contrast to classical classification or continuous effects, and can be  
267 constructed using various other basis functions, including the truncated power function basis.  
268 These special model effects allowed estimation of the expected counts of each animal species at  
269 specified values of time (1964, 1974 and 2012). Because of the two comparisons made for each  
270 species, a multiplicity correction was made to control the familywise Type I error rate. We thus  
271 computed simulation-based step-down-adjusted  $p$ -values [50].

272

### 273 **Modeling temporal variation in rainfall**

274 The time series of rainfall was analyzed by using the unobserved components model (UCM),  
275 which is a special case of the linear Gaussian state space or structural time series model, to  
276 decompose the annual, wet season and dry season rainfall time series ( $r_t$ ) into their trend ( $\mu_t$ ),  
277 cyclical ( $\varphi_t$ ), seasonal ( $\delta_t$ ) and irregular ( $\epsilon_t$ ) components

278

$$279 \quad r_t = \mu_t + \varphi_t + \delta_t + \partial_t + \sum_{i=1}^p \theta_i r_{t-i} + \sum_{j=1}^m \beta_j x_{jt} + \epsilon_t; \quad t = 1, 2, \dots, n \quad (1)$$

280

281 in which  $\partial_t$  is the autoregressive component,  $\sum_{i=1}^p \theta_i r_{t-i}$  is the autoregressive regression terms,  
282  $\beta_j$  are the explanatory regression coefficients,  $x_{jt}$  are regression variables treated as fixed effects  
283 and ( $\epsilon_t$ ) are independent and identically (*i.i.d.*) normally distributed errors or disturbances having  
284 zero mean and variance  $\sigma_\epsilon^2$ . This is equivalent to assuming that  $\epsilon_t$  is a Gaussian white noise  
285 process. The different model components are assumed to be statistically independent of each  
286 other.

287

288 We first assume a random walk (RW) model for the time trend, or equivalently that the trend ( $\mu_t$ )  
289 remains approximately constant through time. The RW trend model can be specified as

290

$$291 \quad \mu_t = \mu_{t-1} + \eta_t \quad (2)$$

292

293 where  $\eta_t \sim i.i.d. N(0, \sigma_\eta^2)$ . Note that  $\sigma_\eta^2 = 0$  implies that  $\mu_t = a \text{ constant}$ .

294

295 Additionally, we assume a stochastic cycle ( $\varphi_t$ ) with a fixed period ( $p > 2$ ), a damping factor ( $\rho$ )  
 296 ) and a time-varying amplitude and phase given by

$$298 \begin{bmatrix} \varphi_t \\ \varphi_t^* \end{bmatrix} = \rho \begin{bmatrix} \cos\omega & \sin\omega \\ -\sin\omega & \cos\omega \end{bmatrix} \begin{bmatrix} \varphi_{t-1} \\ \varphi_{t-1}^* \end{bmatrix} + \begin{bmatrix} v_t \\ v_t^* \end{bmatrix} \quad (3)$$

299  
 300 where  $0 < \rho \leq 1$ ,  $\omega = 2 \times \pi/p$  is the angular frequency of the cycle,  $v_t$  and  $v_t^*$  are independent  
 301 Gaussian disturbances with zero mean and variance  $\sigma_v^2$  and  $0 < \omega < \pi$ . Values of  $\rho$ ,  $p$  and  $\sigma_v^2$  are  
 302 estimated from the data alongside the other model parameters. The damping factor  $\rho$  governs the  
 303 stationarity properties of the random sequence  $\varphi_t$  such that  $\varphi_t$  has a stationary distribution with  
 304 mean zero and variance  $\sigma_v^2/(1 - \rho^2)$  if  $\rho < 1$  but is nonstationary if  $\rho = 1$ . We specified and  
 305 tested for significance of up to three cycles in the annual, wet season and dry season rainfall  
 306 components.

307  
 308 Besides the random walk model (2), we modelled the trend component using a locally linear time  
 309 trend incorporating the level and slope components and specified by

$$311 \mu_t = \mu_{t-1} + \beta_{t-1} + \eta_t, \quad \eta_t \sim i.i.d. (0, \sigma_\eta^2) \quad (4)$$

$$312 \beta_t = \beta_{t-1} + \xi_t, \quad \xi_t \sim i.i.d. (0, \sigma_\xi^2),$$

313  
 314 where the disturbance variances  $\sigma_\eta^2$  and  $\sigma_\xi^2$  are assumed to be independent. The UCM models (1)  
 315 and (4), without the seasonal and regression components, were fitted by the diffuse Kalman  
 316 filtering and smoothing algorithm [51] in the SAS UCM procedure [47].

317  
318 We grouped years with the annual rainfall falling within the 0–10, 11–25, 26–40, 41–75, 76–90,  
319 91–95 and 96–100<sup>th</sup> percentiles of the frequency distribution of the annual rainfall as extreme,  
320 severe or moderate drought years, normal, wet, very wet or extremely wet years, respectively.  
321 The dry (June to October) and wet (November to May) seasons were similarly grouped [52].  
322 These percentiles allowed us to quantify the degree of rainfall deficit or surfeit and represent the  
323 expected broad transitions in rainfall influences on vegetation production and quality in each  
324 year and season.

325

### 326 **Relating animal population size to rainfall**

327 Rainfall primarily governs vegetation production and quality in savannas [53-55], and therefore  
328 also the aggregate and species-specific biomass levels of large African savanna ungulates [37,56-  
329 58]. Population size was related to moving averages of the annual, wet season and dry season  
330 rainfall components each computed over 1, 2, ..., 6 years for a total of six different moving  
331 averages per rainfall component. The maximum of 6-year window was chosen to match the  
332 approximately 5-year dominant periodicity or quasi-cyclical pattern estimated for the time series  
333 of the wet season and annual rainfall components (Fig S3), based on the UCM model and  
334 spectral functions evaluated by the finite Fourier transform method. Spectral densities were  
335 obtained by smoothing the raw spectra or periodograms using moving average smoothing with  
336 weights derived from the Parzen kernel [47].

337

338 The moving rainfall averages index changing habitat suitability for ungulates associated with  
339 carry-over effects of prior rainfall on vegetation conditions. Population sizes was related to each

340 of the 18 moving averages using a generalized linear model assuming a negative binomial error  
341 distribution and a log link function. The following six different functional forms were used for  
342 each of the 18 moving averages [58]:

343  $\mu = \exp(\alpha r)$  (5)

344

345  $\mu = \exp(\alpha r + \beta r^2)$  (6)

346

347  $\mu = \exp(\alpha \ln(r))$  (7)

348

349  $\mu = \exp(\alpha r + \beta \ln(r))$  (8)

350

351  $\mu = \exp(\alpha r + \beta r^2 + \gamma \ln(r))$  (9)

352

353  $\mu = \exp(\alpha r + \beta \ln(r) + \gamma \ln(r))$  (10)

354

355 These models were selected to represent (1) a linear increase or decrease in animal population  
356 size with increasing rainfall, (2) an increase in animal abundance with increasing rainfall up to  
357 some asymptote, or (3) an increase in animal abundance with increasing rainfall up to a peak at  
358 some intermediate levels of rainfall, followed by decline with further increase in rainfall [58].

359 The most strongly supported rainfall component, specific moving average and functional form  
360 were then selected using the corrected Akaike Information Criterion (AICc, [59] Tables S13-  
361 S14).

362



### 363 **Forecasting animal population dynamics using projected future climate**

364 The relationships established between the time series of historic animal counts in the wet and dry  
365 seasons and lagged wet and dry season rainfall series were used to forecast the likely future  
366 trajectories of the wet and dry season population size for each species under three alternative  
367 climate change scenarios. We used the (Vector Autoregressive Moving Average Processes)  
368 VARMAX model to model the dynamic relationships between the wet and dry season counts of  
369 each species and the lagged wet and dry season rainfall and to forecast the seasonal animal  
370 counts. The model is very general and highly flexible and allows for the following among other  
371 features. 1) Modelling several time series of animal counts simultaneously. 2) Accounting for  
372 relationships among the individual animal count component series with current and past values  
373 of the other series. 3) Feedback and cross-correlated explanatory series. 4) Cointegration of the  
374 component animal series to achieve stationarity. 5) Seasonality in the animal count series. 6)  
375 Autoregressive errors. 7) Moving average errors. 8) Mixed autoregressive and moving average  
376 errors. 9) Distributed lags in the explanatory variable series. 10). Unequal or heteroscedastic  
377 covariances for the residuals.

378 The VARMAX model incorporating an autoregressive process of order  $p$ , moving average  
379 process of order  $q$  and in which the number of lags of exogenous (independent) predictor  
380 variables  $s$  is denoted as VARMAX( $p,q,s$ ). Since some animals move seasonally between the  
381 Ngorongoro Crater and the surrounding multiple use areas, the wet and dry season counts do not  
382 estimate the same underlying population size. We therefore treat the wet and dry season counts  
383 as two separate but possibly correlated variables and use a bivariate VARMAX( $p,q,s$ ) model. We  
384 allow variation in herbivore numbers in the wet and dry season to depend on the total wet and  
385 dry season rainfall in the current year ( $t$ ) and in the preceding five years ( $t-1, \dots, t-5$ ). The model

386 thus allows the current wet and dry season rainfall components and their lagged values up to five  
387 years prior to the current count year to influence the population size of herbivores in the current  
388 wet and dry season. The model can also therefore be viewed as a multiple (or distributed) lag  
389 regression model. The VARMAX (p,q,s), model we used to forecast the future population  
390 dynamics of the five most abundant herbivore species can thus be cast as:

$$391 \quad \mathbf{N}_t = \sum_{j=1}^p \Phi_j \mathbf{N}_{t-j} + \sum_{j=0}^s \Omega_j^* \mathbf{x}_{t-j} + \boldsymbol{\epsilon}_t - \sum_{j=1}^q \Omega_j \boldsymbol{\epsilon}_{t-j} \quad (11)$$

392  
393 where  $\mathbf{N}_t = (N_{wet,t}, N_{dry,t})^T$  are the population sizes of the same species in the wet and dry  
394 seasons at time  $t$ ,  $\mathbf{x}_t = (wet_{t-0}, \dots, wet_{t-5}, dry_{t-0}, \dots, dry_{t-5})^T$  are the wet and dry season  
395 rainfall components divided by their long-term means and lagged over 0 to 5 years.  $\boldsymbol{\epsilon}_t =$   
396  $(\epsilon_{wet,t}, \epsilon_{dry,t})^T$  are a two-dimensional vector white noise process. It is assumed that  $E(\boldsymbol{\epsilon}_t) = \mathbf{0}$ ,  $E$   
397  $(\boldsymbol{\epsilon}_t \boldsymbol{\epsilon}_t^T) = \boldsymbol{\Sigma}$  and  $E(\boldsymbol{\epsilon}_t \boldsymbol{\epsilon}_u^T) = \mathbf{0}$  for  $t \neq u$ . We further assume that  $p$  and  $q$  are each equal to either 1 or 2  
398 whereas  $s$  is set equal to 5. Accordingly, the model can be denoted symbolically as a VARMAX  
399 (2,2,5) model. In other words, in order to project the population dynamics of the Ngorongoro  
400 large herbivores, we built a model relating the population size of each herbivore species in the  
401 current year ( $t$ ) to the population size in the past one to two years (year  $t-1$  and  $t-2$ ; i.e.,  
402 autoregressive process of order  $p = 1$  or  $2$ ). The model also allows residuals for the current year  
403 to depend on the residuals for the previous one to two years (i.e. a moving average process of  
404 order  $q = 1$  or  $2$ ). Since herbivore numbers are counted once in the wet season and once in the dry  
405 season of each year we did not allow for seasonal variation in the counts.

407

408 The VARMAX (p,q,s) model can be represented in various forms, including in state space and  
409 dynamic simultaneous equation or dynamic structural equations forms. We used bivariate  
410 autoregressive moving average models with the wet and dry season rainfall as the explanatory  
411 variables. We tested and allowed for various lags in rainfall so that the models can be  
412 characterised as autoregressive and moving-average regression with distributed lags. We also  
413 used dead-start models that do not allow for present (current) values of the explanatory variables.  
414 We tested for heteroscedasticity in residuals and tested the appropriateness of GARCH-type  
415 (generalized autoregressive conditional heteroscedasticity) conditional heteroscedasticity of  
416 residuals. We used several information-theoretic model selection criteria as aids to determine the  
417 autoregressive (AR) and moving average (MA) orders of the models. The specific criteria we  
418 used were the Akaike information criterion (AIC), the corrected AIC (AICc) and the final  
419 prediction error (FPE). As additional AR order identification aids, we used partial cross-  
420 correlations for the response variable, Yule-Walker estimates, partial autoregressive coefficients  
421 and partial canonical correlations. Parameters of the selected full models were estimated using  
422 the maximum likelihood (ML) method. Roots of the characteristic functions for both the AR and  
423 MA parts (eigenvalues) were evaluated for the proximity of the roots to the unit circle to infer  
424 evidence for stationarity of the AR process and inevitability of MA process in the response  
425 series.

426

427 The adequacy of the selected models was assessed using various diagnostic tools. The specific  
428 diagnostic tools we used are the following. 1) Durbin-Watson (DW) test for first-order  
429 autocorrelation in the residuals. 2) Jarque-Bera normality test for determining whether the model  
430 residuals represent a white noise process by testing the null hypothesis that the residuals are

431 normally distributed. 3) F tests for autoregressive conditional heteroscedastic (ARCH)  
432 disturbances in the residuals. This F statistic tests the null hypothesis that the residuals have  
433 equal covariances. 4) F tests for AR disturbance computed from the residuals of the univariate  
434 AR(1), AR(1,2), AR(1,2,3) and AR(1,2,3,4) models to test the null hypothesis that the residuals  
435 are uncorrelated. 5) Portmanteau test for cross correlations of residuals at various lags. Final  
436 forecasts and their 95% confidence intervals were then produced for the animal population size  
437 series for each of the five most common species in each season for lead times running from 2013  
438 up to 2100.

439  
440 In the table of the parameter estimates for the bivariate VARMAX (2,2,5) model fitted to the two  
441 time series of herbivore population size in the wet and dry seasons (Table S1), the five lagged  
442 dry and wet season rainfall components (rightmost column labelled variable) for the current year  
443 (year  $t$ ) up to five years prior to the current year (years  $t-1, \dots, t-5$ ) are denoted by dry ( $t$ ), ..., dry  
444 ( $t-5$ ) and wet ( $t$ ), ..., wet ( $t-5$ ), respectively. Analogously, for the dry season counts, the  
445 autoregressive process of order 2 is denoted by, e.g., wildebeest\_dry\_ $(t-1)$  and wildebeest\_dry ( $t$   
446  $-2$ ) while the moving average process of order 2 by e1( $t-1$ ) and e2 ( $t-2$ ). A parallel notation is  
447 used for the wet season counts. The estimated regression coefficients (estimate) for the  
448 parameters associated with each of these variables plus the intercept (Const1), the standard  
449 errors of the estimates and a  $t$ -test ( $t$ -value) of the null hypothesis that each coefficient is not  
450 significantly different from zero ( $\text{Pr } > |t|$ ) are also provided in Table S1. Furthermore, the  
451 estimated roots of the autoregressive (Table S2) and moving average (Table S3) processes are  
452 provided. It is important to note that the population of each herbivore species in the wet season  
453 of the current year depends not only on its lagged values in the preceding one to two years and

454 on the current and past values of rainfall but also on the population of the same herbivore species  
455 in the dry season lagged over the past one to two years. The same applies to the population of  
456 each herbivore species in the current dry season. This interdependence of the two series on each  
457 other is made possible because of the bivariate nature of the VARMAX (p,q,s) model. This  
458 model was fitted to the population counts of the herbivores for the wet and dry seasons for the  
459 period 1964-2012 based on historic station rainfall data for 1963 to 2012. Note that the historic  
460 total wet season rainfall component was divided by its mean for use in the model. The same was  
461 done for the total dry season rainfall component. Future forecasts were then produced by  
462 supplying the projected wet and dry season rainfall values, each divided by its mean, for  
463 Ngorongoro for 2013 to 2100.

464 Several univariate model diagnostics were used to extensively assess how well the selected  
465 bivariate VARMAX (p,q,s) model fitted the count data (Tables S4-S7). The first model  
466 diagnostic tool, the Portmanteau Test for Cross Correlations of Residuals (Table S4) was  
467 significant, considering only up to lag 5 residuals. This test of whether the residuals are white  
468 noise residuals (i.e. uncorrelated) based on the cross correlations of the residuals, suggests that  
469 the residuals were apparently correlated, when only up to lag 5 residuals are considered. Even so,  
470 results of the univariate model ANOVA diagnostics suggest that the models for both the dry and  
471 wet season counts were highly significant and had high predictive power ( $r^2$ , Table S5). Results  
472 of the Univariate Model White Noise Diagnostics (Table S6) suggest that the residuals are  
473 normally distributed (Jarque-Bera normality test) and have equal covariances (ARCH (1)  
474 disturbances test). The Univariate AR Model Diagnostics indicate that the residuals are  
475 uncorrelated, contrary to the finding of the multivariate Portmanteau test (Table S7). The  
476 modulus of the roots (eigenvalues) of the AR characteristic polynomial are less than 1 suggesting

477 that the series are stationary. These tests suggests that the fitted models are reasonable. The log-  
478 transformed animal count totals, rainfall deviates, projected rainfall and forecast animal count  
479 totals (log scale) are provided in S4 Data. The SAS program codes used to analyze the rainfall  
480 data are provided in S1 Text while the code for analyzing the animal counts is provided in S2  
481 Text.

## 482 **Results**

### 483 **Rainfall**

484 Rainfall can be subdivided into the dry and wet season components. The dry season occurs from  
485 June to October whereas the wet season occurs from November to May. The wet season rainfall  
486 component is strongly bimodal, with the two modes corresponding to peaks in the long rains and  
487 the short rains. The major peak in rainfall occurs in April during the long rains (January-May)  
488 whereas the minor peak occurs in December during the short rains (November-December, Fig  
489 2a). The total monthly rainfall averaged  $78.3 \pm 84.2$  mm and was highly variable (%CV =  
490 107.5%) during 1963-2014 (Fig 2a). The total annual rainfall averaged  $937.5 \pm 300.7$  mm during  
491 1963-2014 (Fig. 2b) out of which the wet season rainfall ( $851.7 \pm 297.3$  mm) contributed 90.9%  
492 (Fig 2c) and the dry season rainfall ( $85.5 \pm 65.2$  mm) a mere 10.1% (Fig 2d). There were also  
493 considerable interannual variations in the annual, wet and dry season rainfall components (Figs  
494 2b-d). Smoothing of the time series of the total monthly rainfall exposed substantial variation  
495 with periods of below-average rainfall centered around 1966, 1975, 1980 and 1999 (Fig S1).

496  
497 Analysis of the annual rainfall showed that extreme droughts occurred in 1966, 1980, 1993,  
498 1995, 1999 and 2000 while severe droughts were recorded in 1974-1976, 1981, 1991, 2004 and  
499 2014. Further, the extremely wet years were 1983 and 2007 whereas very wet years were 1964,

500 1997 and 1998. Analysis of the wet season rainfall identified the same extreme and severe  
501 droughts and very wet years as the annual rainfall did (Table S8, Fig S2). In addition, the wet  
502 season of 1969 experienced an extreme drought while the 1982 wet season was a severe drought.  
503 The dry seasons of 1968, 1985, 1987, 1990, 1992 and 1993 were extremely dry and the dry  
504 seasons of 1970, 1973, 1995, 1996, 1999, 2001 and 2010 were severe droughts. By contrast the  
505 dry seasons of 1967, 1969, 1982, 1989 and 2011 were either extremely wet or very wet (Table  
506 S8, Fig S2).

507  
508 There were significant quasi-cyclic oscillations in the three rainfall components with  
509 approximate cycle periods of 4.64, 4.64 and 2.47 years for the annual, wet season and dry season  
510 rainfall components, respectively, based on spectral analysis (Table S9, Fig S3). Based on the  
511 unobserved components model (UCM), the oscillations in the annual, wet season and dry season  
512 rainfall components had dominant cycle periods of 4.83, 3.82 and 2.45 years, respectively (Table  
513 S10, Fig S4). In addition, there were secondary cycles in the wet and dry season rainfall  
514 components with approximate cycle periods of 2.2 years for the wet season component and 11.3  
515 years for the dry season component (Table S10, Figs S4). The estimated damping factors for the  
516 cycles were all less than 1 except for the cycle for the annual rainfall component with a period of  
517 4.83 years and the cycle with a period of 2.2 years for the wet season rainfall component both of  
518 which had damping factors equal to 1 (Table S10, Fig S4). The two cycles with damping factors  
519 equal to 1 are persistent whilst the remaining cycles with damping factors smaller than 1 are  
520 transient.

521

522 The disturbance variances for the irregular components for the wet and dry season rainfall, but  
523 not for the annual rainfall, were close to zero and statistically insignificant. This implies that the  
524 irregular components for the two seasonal rainfall components were deterministic whereas the  
525 irregular component for the annual rainfall was stochastic. Moreover, the estimated disturbance  
526 (error) variances for the cyclical components were significant for the 3.83-year cycle for the wet  
527 season and for both cycles for the dry season but not for the 4.83-year cycle for the annual  
528 rainfall (Table S10, Figs S4). These features jointly imply that the 4.83-year cycle identified for  
529 the annual rainfall is persistent and deterministic whereas the cycles identified for both the wet  
530 and dry season rainfall are stochastic and transient (Table S10, Figs S4). Even so, significance  
531 analysis of the disturbance (error) variances of the cyclical components in the model at the end of  
532 the estimation span indicate that the disturbance variances for the cycle in the annual rainfall  
533 component and both cycles in the wet season rainfall component were significant but those for  
534 the two cycles in the dry season rainfall component were insignificant (Table S11). Since the  
535 4.83-cycle in the annual rainfall component is deterministic the additional significant test result  
536 means that the annual cycle is indeed significant. The significant disturbance variances for the  
537 two stochastic cycles in the wet season rainfall component (Table S11) applies only to the part of  
538 the time series of wet season rainfall near the end of the estimation span.

539

540 The disturbance terms for the level component for all the three rainfall components were  
541 significant only for the wet season but not for the annual or dry season rainfall. As well, the slope  
542 component was significant only for the wet season rainfall (Table S11, Fig S4). This implies that,  
543 of the three rainfall components, only the wet season rainfall increased systematically over time  
544 in Ngorongoro (Table S11, Fig S4). The smoothed rainfall cycles in the three rainfall



545 components further reinforce the conclusion that the oscillation in annual rainfall is persistent  
546 and deterministic whereas the oscillations in the wet and dry season rainfall are transient and  
547 stochastic (Fig S4).

548

#### 549 **Projected rainfall and temperatures**

550 The projected annual rainfall showed no evident systematic trend under all the three scenarios.  
551 However, the general average rainfall level is consistently and substantially higher under the  
552 RCP2.6 than the RCP4.5 and 8.5 scenarios. The RCP4.5 and 8.5 scenarios have comparable  
553 average levels but RCP4.5 is expected to receive somewhat more rainfall. Notably, rainfall  
554 shows marked inter-annual variation characterized by sustained quasi-cyclic oscillations during  
555 2006-2100 regardless of scenario (Fig S5).

556

557 The minimum and maximum temperatures are expected to rise during 2006-2100, on average, by  
558 1, 2 and 6 °C under the RCP2.6, 4.5 and 8.5 scenarios, respectively. Consequently, the average  
559 maximum temperature is expected to increase during 2006-2100 from 23 to 24 °C under  
560 RCP2.6, 24 to 26 °C under RCP4.5 and 23 to 29 °C under RCP8.5. The average minimum  
561 temperature is similarly anticipated to rise during 2006-2100 from 14 to 15 °C under RCP2.6, 14  
562 to 16 °C under RCP4.5 and 14 to 20 °C under RCP8.5 (Fig S5).

563

#### 564 **Changes in vegetation composition and structure**

565 From 1966/67 [14] to 1995 [38] there have been significant changes in the structure of the major  
566 and secondary herbaceous species. In 1966/67 the Crater floor was dominated by short grass

567 herbaceous species. By 1995, most of the short grasslands had been replaced by mid to tall plant  
568 species.

569

570 **Table 1. Changes in vegetation structure from 1966/67 to 1995.**

| Major Herbaceous Species (ha)     |           |       |
|-----------------------------------|-----------|-------|
|                                   | Herlocker | Chuwa |
| Short                             | 20868     | 10626 |
| Mid                               | 2110      | 9540  |
| Mid-tall                          | 5794      | 4506  |
| Tall                              | 1377      | 4227  |
| Secondary Herbaceous Species (ha) |           |       |
| Short                             | 18584     | 4794  |
| Mid                               | 2812      | 3905  |
| Mid-tall                          | 2004      | 9096  |
| Tall                              | 1317      | 2258  |

571

572 **Historic herbivore population dynamics**

573 The population size of wildebeest, zebra, Thomson's gazelle, Grant's gazelle, kongoni (Coke's  
574 hartebeest), and black rhino increased from 1964 to a peak around 1974-1976 and then declined  
575 thereafter in both the wet and dry seasons. Eland and waterbuck had a general downward trend  
576 from the early 1970's. Zebra numbers increased again from 1995 to 2012 whereas Grant's  
577 gazelle and kongoni numbers in the dry season increased again from 1995 to 2000 before  
578 declining further (Fig 3). In stark contrast to the other species, numbers of buffalo increased  
579 markedly following the removal of Maasai livestock from the Crater in 1974. Elephant and  
580 ostrich numbers have similarly increased in the Crater, with substantial increase apparent in

581 ostrich numbers following the extreme 1993 dry season drought (Fig 3). Buffalo, eland, elephant  
582 and black rhino were more abundant in the Crater in the wet than the dry season. There were far  
583 more eland and black rhino in the Crater in the wet season compared to the dry season in the  
584 1970s than in the 2000s. Conversely, there were far more buffalo and elephants in the Crater in  
585 the wet season compared to the dry season in the 2000s than there were in the 1970s (Fig 3).  
586 Zebra were the only species to have maintained similar population sizes from 1964 to 2012.  
587  
588 Comparisons of the expected population sizes between 1964 and 1974 as well as between 1974  
589 and 2012 based on constructed spline effects showed that while some species increased  
590 significantly over time, others did not, or even declined. Species that increased but not  
591 significantly between 1964 and 1974 in the wet season were wildebeest, Grant's gazelle,  
592 waterbuck and ostrich (Table S12, Fig 3). Only buffalo, Thomson's gazelle and kongoni  
593 numbers increased significantly between 1964 and 1974 in the wet season. Species that  
594 decreased in numbers but not significantly between 1964 and 1974 in the wet season were zebra,  
595 eland, elephant and black rhino. Between 1974 and 2012, the numbers of Thomson's gazelle,  
596 Grant's gazelle, black rhino, eland, kongoni and waterbuck decreased significantly in the wet  
597 season. In the same season and period, the numbers of buffalo and elephant increased  
598 significantly. Zebra, wildebeest, and ostrich had no significant change (Table S12, Fig 3). In the  
599 dry season, by contrast, numbers of some species either increased significantly between 1964  
600 and 1974 (buffalo, elephant, eland, kongoni), increased but not significantly (waterbuck) or  
601 decreased but not significantly (wildebeest, zebra, Thomson's gazelle, Grant's gazelle, ostrich).  
602 However, between 1974 and 2012 in the dry season, numbers of some species either increased  
603 significantly (buffalo, ostrich), increased but not significantly (waterbuck), decreased

604 significantly (Thomson's gazelle, Grant's gazelle, black rhino, eland, kongoni), or decreased but  
605 not significantly (wildebeest, zebra, elephant, Table S12, Fig 3).

606

### 607 **Herbivore biomass dynamics**

608 Herbivore biomass in the wet season was initially dominated by wildebeest, followed by zebra.

609 Following the eviction of the Maasai and their livestock from the Crater in 1974, buffalo biomass

610 increased relative to wildebeest and zebra to a peak during 1999-2000. After the 1999-2000

611 drought, the biomass of buffalo and the other herbivore species declined to the pre-drought

612 levels. Nevertheless, wildebeest still makes a smaller contribution to the total biomass currently

613 than they did before cattle left the Crater and buffalo numbers were still low (Fig 4a). The

614 relative increase of buffalo biomass compared to wildebeest and zebra was also apparent in the

615 dry season biomass (Fig 4b).

616

617 The total herbivore biomass trends in the Crater have been dynamic and relatively stable. During

618 the dry season from 1964 to 1974 there was no significant change and this trend was also non-

619 significant for the dry season from 1974 to 2011 (Table 2). This scenario of a non-significant

620 trend from 1964 to 1974 and again from 1974 to 2011 was also consistent for the wet season

621 (Table 2).

622 **Table 2. The expected aggregate biomass in the wet and dry seasons of 1964, 1974 and 2011 and the difference between the**  
 623 **1964 vs 1974 and 1974 vs 2011 estimates and test of significance of their difference based on constructed penalized cubic B-**  
 624 **splines.**

| Statement Number | Label                                           | Estimate | Standard Error | DF    | t Value | Pr >  t | Adjustment | Adj P  |
|------------------|-------------------------------------------------|----------|----------------|-------|---------|---------|------------|--------|
| 1                | Dry Season at time=1964                         | -63.3804 | 265.19         | 2.326 | -0.24   | 0.8306  |            | .      |
| 2                | Dry Season at time=1974                         | -41.5788 | 146.46         | 2.349 | -0.28   | 0.7996  |            | .      |
| 3                | Dry Season at time=2011                         | 8.0933   | 0.1129         | 47.44 | 71.67   | <0.0001 |            | .      |
| 5                | Wet Season at time=1964                         | -64.2763 | 265.14         | 2.326 | -0.24   | 0.8282  |            | .      |
| 6                | Wet Season at time=1974                         | -41.5482 | 146.46         | 2.349 | -0.28   | 0.7998  |            | .      |
| 7                | Wet Season at time=2011                         | 8.4434   | 0.1336         | 50.95 | 63.2    | <0.0001 |            | .      |
| 4                | Diff for Dry Season at time= 1964 vs time= 1974 | 21.8017  | 123.24         | 2.309 | 0.18    | 0.8739  | Simulated  | 0.9479 |
| 4                | Diff for Dry Season at time= 1974 vs time= 2011 | 49.6721  | 146.46         | 2.349 | 0.34    | 0.7625  | Simulated  | 0.8474 |
| 8                | Diff for Wet Season at time= 1964 vs time= 1974 | 22.7281  | 123.16         | 2.309 | 0.18    | 0.8686  | Simulated  | 0.9447 |
| 8                | Diff for Wet Season at time= 1974 vs time= 2011 | 49.9916  | 146.46         | 2.348 | 0.34    | 0.761   | Simulated  | 0.8463 |

625

## 626 **Relationship between herbivore population size and rainfall**

627 Herbivore population size was correlated with rainfall in both the wet and dry seasons. The  
628 particular rainfall component most strongly correlated with population size as well the specific  
629 functional form of the relationship both varied with species and season (Figs 5 and 6, Tables  
630 S13-S14). In the wet season, population size was most tightly correlated with 1) 6-year moving  
631 averages of the wet season rainfall (wildebeest, zebra, buffalo, eland, kongoni, waterbuck,  
632 ostrich, elephant, black rhino), 2) 6-year moving average of the annual rainfall (Thomson's and  
633 Grant's gazelles), or 3) the current annual rainfall (warthog). In the dry season, population size  
634 had the strongest correlation with 1) 6-year moving average of the wet season rainfall  
635 (Thomson's and Grant's gazelle, buffalo, waterbuck, ostrich), 2) 5-6-year moving average of the  
636 dry season rainfall (wildebeest, zebra, warthog), 3) 6-year moving average of the annual rainfall  
637 (eland, kongoni), or 4) 3-4-year moving average of dry season rainfall (elephant, black rhino,  
638 Figs 5 and 6, Tables S13-S14). The dependence of population size on rainfall followed three  
639 general patterns. The first pattern is characterized by a decline in population size with increasing  
640 rainfall and is shown by wildebeest, eland, kongoni, waterbuck and black rhino in the wet  
641 season, and Thomson's gazelle, Grant's gazelle and waterbuck in the dry season. The second  
642 pattern consists of an increase in population size with increasing rainfall and is shown by zebra,  
643 buffalo, ostrich and elephant in the wet season and wildebeest, zebra, buffalo, ostrich and  
644 warthog in the dry season. The third and last pattern is characterized by a humped relationship  
645 between population size and rainfall in which population size peaks at intermediate levels of  
646 rainfall and is shown by Thomson's and Grant's gazelles and warthog in the wet season and  
647 eland, kongoni, elephant and black rhino in the dry season (Figs 5 and 6, Tables S13-S14).  
648

649 **Projected herbivore population dynamics**

650 The projected ungulate population dynamics should mirror the pronounced and sustained  
651 oscillations in the projected rainfall. Further, large-sized herbivores dependent on bulk, low-  
652 quality forage should prosper under the wet and cooler conditions expected under RCP2.6.  
653 Likewise, small-sized herbivores requiring high-quality forage should thrive under the relatively  
654 low rainfall and warmer conditions anticipated under RCP4.5 and 8.5. The warmer temperatures  
655 expected under RCP8.5 than under RCP4.5 imply that conditions should be most arid under this  
656 scenario.

657 The projected population trajectories suggest that under the RCP2.6 scenario, buffalo numbers  
658 will likely continue to increase after 2012, albeit at a decelerating rate, towards 7000-11000  
659 animals by 2100 (Fig 7). But the Crater buffalo population is likely approaching its upper bound  
660 of about 4000 animals and will likely fluctuate about this number (4000) till 2100 under the  
661 RCP4.5 and 8.5 scenarios regardless of season (Fig 7). As expected, the population of this large-  
662 sized bulk grazer is projected to be highest on average under RCP2.6, least under RCP8.5 and  
663 intermediate under RCP4.5 for both the wet and dry seasons (Fig 7).

664 For wildebeest, the projected trajectories suggest strong and sustained oscillations in population  
665 size under all the three scenarios and both seasons, reflecting the strong projected rainfall  
666 oscillations (Fig 8). The oscillatory population dynamics in both the wet and dry seasons  
667 exhibited by wildebeest reveal extended periods of population increase followed by prolonged  
668 periods of persistent population declines. Nevertheless, there are also discernible differences in  
669 the projected population trajectories under the three climate change scenarios. The projected  
670 wildebeest population trajectories suggest that the population will continue to fluctuate widely  
671 between 5000 and 15000 animals in all the scenarios and seasons. It is only under the RCP2.6

672 scenario that the dry season population shoots beyond 20000 animals around 2070 and 2090 (Fig  
673 8). In the wet season, the projected average wildebeest abundance is highest under RCP4.5,  
674 intermediate under RCP8.5 and lowest under RCP2.6. In the dry season, however, wildebeest  
675 abundance is highest on average under RCP2.6, intermediate under RCP4.5 and lowest under  
676 RCP8.5 (Fig 8).

677 The zebra population trajectories also reveal striking oscillations in population size under all the  
678 three scenarios, a general increase in population size under RCP2.6 scenario in both seasons and  
679 a decrease and then increase in the RCP8.5 scenario in the wet season (Fig 9). The zebra  
680 population size is projected to decline in the long term under the RCP4.5 scenario in both  
681 seasons and the RCP8.5 scenario in the dry season (Fig 9). In general, zebra will perform the best  
682 under RCP2.6 and the worst under RCP8.5. The performance of zebra under RCP4.5 will be  
683 intermediate between RCP2.6 and 8.5 from 2006 to around 2070 after which it will drop below  
684 that expected under RCP8.5 (Fig 9).

685 The decline observed in historic Thomson's gazelle numbers is projected to be persistent and to  
686 remain below the peak attained historically around 1974 under all scenarios and both seasons  
687 (Fig 10). Besides the general decline, Thomson's gazelle numbers are projected to show  
688 persistent and marked oscillations irrespective of scenario or season. As predicted by their small  
689 body size and selective grazing, Thomson gazelles will likely perform the best under RCP8.5  
690 with the least rainfall, intermediately under RCP4.5, and the worst under RCP2.6 (Fig 10).

691 As with Thomson's gazelles, the projected population trajectories for Grant's gazelle show  
692 marked and sustained oscillations (Fig 11). Despite these persistent oscillations, Grant's gazelle  
693 numbers will likely remain lower than the historically attained peak numbers around 1974-1976.



694 Moreover, the declining trend in Grant's gazelle numbers is projected to be replaced by an  
695 increasing trend after some time under the RCP4.5 and 8.5 scenarios for both seasons. Even, so  
696 Grant's gazelle numbers, are less likely to increase up to the highest historically recorded  
697 numbers around 1974-1976 (Fig 11). Consistent with their small body size and selective grazing,  
698 Grant's gazelles will also likely flourish the best under RCP8.5 with the least rainfall,  
699 intermediately under RCP4.5, and the worst under RCP2.6 (Fig 11).

700

## 701 **Discussion**

### 702 **Rainfall**

703 Drought is a recurrent feature of the Ngorongoro Conservation Area. The annual rainfall shows  
704 evident persistent and deterministic quasi-periodic oscillation with a cycle period of about 5  
705 years. Oscillations in the wet and dry season rainfall were stochastic and transient. The quasi-  
706 cyclic oscillations in annual, wet and dry season rainfall were statistically significant. The  
707 oscillations are associated with recurrent severe droughts that cause food scarcity and hence  
708 nutritional stress for the large herbivores. The wet season rainfall increased systematically in  
709 Ngorongoro between 1964 and 2014 but the annual or dry season rainfall did not increase. The  
710 oscillations in rainfall imply that the large herbivores are exposed to above average food supply  
711 for about 2.5 years and to below average food supply for the subsequent 2.5 years. The rainfall  
712 patterns also imply that portions of the Crater may be waterlogged or flooded during the high  
713 rainfall years. High rainfall supports above-average production of plant biomass. But the forage  
714 produced during high rainfall years is likely to be of low quality due to the dilution of plant  
715 nutrients. Predation risk for herbivores is also likely to rise due to poor visibility associated with  
716 tall grass growth during periods of high rainfall [60].

717

## 718 **Long-term Vegetation Trends**

719 Vegetation maps from before and after the removal of pastoralists and their livestock indicate  
720 that major changes in vegetation structure occurred. Maasai pastoralists manage their grazing  
721 areas with movement of livestock and fire [16, 61,62]. This type of range management selects for  
722 shorter grasses and more palatable species [63,64]. The 1995 vegetation map shows that there  
723 was a significant change in the vegetation structure of the Crater floor, such that there was a  
724 decrease in the availability of short grasses and an increase in medium and tall grassland.

725

## 726 **Historic herbivore population dynamics**

727 Temporal variation in herbivore numbers in the Crater followed four general patterns. First,  
728 buffalo, elephant and ostrich numbers increased significantly in the Crater from 1974-2012. The  
729 transition of the Crater grasslands to a majority of the area being mid to tall-grass would have  
730 favored Cape buffalo reproduction and survivorship. The increase in ostrich and elephant  
731 numbers in both seasons became more marked after the severe 1993 drought. Second, the overall  
732 average number of zebra in the Crater appeared stable whereas numbers of the other eight  
733 species declined substantially between 1974 and 2012 relative to their peak numbers during  
734 1974-1976. Third, numbers of both gazelles, eland, kongoni, waterbuck (wet season only) and  
735 black rhino declined significantly in the Crater in both seasons following the removal of the  
736 Maasai and their cattle from the Crater in 1974. The decline in black rhino is mainly attributed to  
737 poaching in the 1970's and 1980's which reduced the population to 10 individuals [65]. Fourth,  
738 wildebeest numbers decreased in the Crater between 1974 and 2012 but this decrease was not  
739 statistically significant. In addition, some herbivore species were consistently more abundant

740 inside the Crater during the wet than the dry season. This pattern was most evident for the large  
741 herbivore species requiring bulk forage, comprising buffalo, eland, elephant and black rhino. The  
742 latter may spend less time in the swamps and the forest during the wet season and may be easier  
743 to count.

744

#### 745 **Herbivore biomass**

746 Despite the significant changes in the population sizes of individual species in the Crater, the  
747 total herbivore biomass remained relatively stable from 1963 to 1974 and from 1974-2012,  
748 implying that the Crater has a stable multi-herbivore community. There is a tendency towards a  
749 higher biomass during the wet season, but it is not significant. Total wild herbivore biomass has  
750 not been significantly affected by the removal of the pastoralists and their livestock. The change  
751 in the grassland structure from mainly short grasses to mid to tall grasses after the removal of the  
752 Maasai and their livestock may have enhanced the forage availability for Cape buffalo, a large-  
753 bodied ruminant. The biomass of buffalo had the most dramatic increase post 1974 to become a  
754 major constituent of the total large herbivore biomass after the elimination of cattle from the  
755 Crater in 1974. A similar increase in buffalo numbers at the expense of small and medium  
756 herbivores has also been documented for Nairobi and Lake Nakuru National Parks in Kenya  
757 [66,67].

758

#### 759 **Relationship between herbivore population size and rainfall**

760 Rainfall significantly influenced herbivore abundance in Ngorongoro Crater and this influence  
761 varied with species and season and partly reflect functional distinctions between the species  
762 based on their life-history traits (body size, gut morphology) or life-history strategies (feeding

763 and foraging styles). Herbivores responded to rainfall variation in three different ways in both  
764 seasons. In the wet season, numbers of herbivore species either decreased (wildebeest, eland,  
765 kongoni, waterbuck and rhino), increased (zebra, buffalo, ostrich and elephant) or increased up  
766 to intermediate levels of rainfall and then decreased with further increase in rainfall (both  
767 gazelles and warthog). Similarly, in the dry season the numbers of the herbivore species either  
768 decreased (both gazelles and waterbuck), increased (wildebeest, zebra, buffalo, ostrich and  
769 warthog) or increased up to intermediate levels of rainfall and then decreased with further  
770 increase in rainfall (eland, kongoni, elephant and rhino).

771

#### 772 **Forecasted herbivore population dynamics**

773 The projected population trends suggest strong interspecific contrasts regarding the scenario  
774 under which each species will likely perform best but broad similarities exist between seasons  
775 for each scenario. Except for buffalo whose numbers appear to approach asymptotes, population  
776 trajectories for wildebeest, zebra and both gazelles exhibit pronounced and sustained oscillatory  
777 dynamics, reflecting rainfall oscillations. The projected population trajectories for buffalo and  
778 zebra suggest that both species will be most abundant in the Crater under the RCP2.6 scenario,  
779 intermediate under RCP4.5 and least abundant under RCP8.5 in both seasons. This is expected  
780 since buffalo is a large-sized bulk grazer and zebra is a large-sized non-ruminant able to process  
781 large quantities of low quality forage expected to be most abundant under the wetter and cooler  
782 conditions anticipated under RCP2.6 relative to RCP4.5 and 8.5. Moreover, for both buffalo and  
783 zebra, the projected trajectories are generally similar between the RCP4.5 and 8.5 scenarios for  
784 both seasons.

785

786 By contrast, the wildebeest that requires short, green grass is anticipated to be more abundant  
787 under the RCP4.5 and 8.5 scenarios than under the RCP2.6 scenario with wetter conditions in the  
788 wet season. In the more arid dry season conditions, wildebeest should however thrive better  
789 under the more moist RCP2.6 scenario than under RCPs 4.5 and 8.5.

790  
791 Trajectories for both gazelles suggest that both species will be most abundant under RCP8.5 with  
792 the lowest average rainfall, intermediate under RCP4.5 with intermediate rainfall and least  
793 abundant under RCP2.6 with the highest rainfall. This is consistent with the preference of both  
794 species for high-quality, short grasses and forbs. For both gazelles numbers will likely increase  
795 from about 2050-2060 to 2100 under RCP4.5. Also, for both gazelles, the projections suggest  
796 persistent and similar population oscillations between both seasons under each of the three  
797 scenarios. The oscillations suggest extended periods of population decline followed by increase  
798 for both gazelles in both seasons. We reiterate that these projections are based solely on rainfall  
799 influences on large herbivore population dynamics, yet the dynamics of large herbivores are  
800 often influenced by a multitude of other factors.

801

## 802 **Predation**

803 The major predators in Ngorongoro Crater are lions and spotted hyenas. These species, their  
804 population dynamics and feeding ecology have been studied since the 1960's [4-8, 68-70].

805

806 In the 1960's the Ngorongoro Crater had a population of approximately 298 spotted hyenas [4].  
807 When Höner et al [70] started their research in 1996 the population was about 117 hyenas and  
808 the recruitment rate was higher and the mortality was lower than during Kruuk's study period in

809 the 1960's. Herbivore census data indicates that there had been a decline in the spotted hyena  
810 prey populations, i.e. wildebeest, zebra, Thomson's gazelle, and Grant's gazelle by 1996. From  
811 1996 to 2002, there was an increase in the hyena population to 333 individuals. From 1996 to  
812 2002 there was an increase in the abundance of these prey species with an average prey density  
813 of  $139 \pm 76$  prey animals per  $\text{km}^2$ . Höner et al [70] attribute the decline in the hyena population  
814 from the 1960's to 1996 to the decline in their prey populations. However, from 1996 to 2002,  
815 the major predictor for the spotted hyena population increase was the increase in their prey  
816 population. Subsequently there was a reduction and then recovery of the population during an  
817 outbreak of *Streptococcus equi ruminatorum* in 2001 to 2003. Mortality was higher in adult  
818 males and yearlings in territories where prey densities were low. In the short term the bacterial  
819 infection had a top-down impact on sex and age classes that had relatively poor nutrition. In the  
820 longer-term after the disease perturbation, the reduced population growth was due to lower  
821 juvenile survival. By 2008 the population had recovered and was approximately 450 [71] and in  
822 2012 the population was estimated at 508 of which 364 were adults (pers com Höner 2018).

823  
824 From 1970 to 1972, Elliot and McTaggart Cowan [68] studied lions in the Crater and estimated a  
825 resident population of 65 lions in four prides. They estimated that lions annually killed or  
826 scavenged approximately 7% of the wildebeest, 4.3% of the zebra and 6.2% of the Thomson's  
827 gazelle. Adapted from Kruuk [4] they estimated that hyenas took at least 7.6% of the wildebeest  
828 population, 6.5% of the zebra population and 1.6% of the Thomson's gazelle population. Thus  
829 the estimated annual percentage of wildebeest killed or scavenged by lions and hyena was  
830 approximately 14.6%, roughly equal to the wildebeest recruitment rate [4]. The predation and  
831 scavenging rate on zebra was approximately 10.7%.

832  
833 Long term research on lions in the Ngorongoro Crater [7,8,69]() indicates that the lion  
834 population may not be food limited but that weather extremes (high rainfall/drought) correlate  
835 with disease outbreaks and pest infestations (Canine distemper virus and biting *Stomoxys* flies).  
836 The resulting mortality is exacerbated by pride takeovers and infanticide. A severe infestation of  
837 *Stomoxys* flies in 1962 reduced the lion population to 10 lions that were joined by seven  
838 immigrating males in 1975. This severe population reduction may have been a ‘bottleneck’ and  
839 the current population may be based on 15 founders [7]. The population rose to a high of 124  
840 lions in 1983, but by 1991 there were 75 to 100 lions, and numbers dropped to 29 in 1998 [7,8].  
841 The lion population may be density dependent since it has had positive reproductive performance  
842 when the population has been less than 60 individuals and has had negative reproductive  
843 performance when the population was more than 60 individuals. From 1994 to 2004, the  
844 population had not had reduced reproductive performance. Kissui and Packer [8] attribute the  
845 declines in the lion population to disease outbreaks that correlated with extreme weather events  
846 that occurred in 1962, 1994, 1997, and 2001. During 2000/2001 there was a decrease in the lion  
847 population due to death (*Stomoxys* flies) and emigration [70].

848

#### 849 **Poaching**

850 The black rhino declining trend from the 1970’s to mid 1980’s was due to poaching [72]. Since  
851 the early 1990’s there has been limited poaching and the population is slowly recovering.  
852 Conservative population projections in 1995 [65] predicted that with the best scenario, i.e. no  
853 poaching, the population should be approximately 35 to 40 individuals by 2017. The current  
854 Black rhino population is 59 individuals (Pers comm, M. Musuha, 2018, NCAA,).

855

856 **Disease**

857 Before the 1960's, rinderpest was a source of significant mortality to buffalo, wildebeest and  
858 eland in the Crater Highlands and there was a serious outbreak affecting yearling buffalo  
859 adjacent to the Ngorongoro Crater in 1961 [73]. The NCAA started an inoculation campaign  
860 against rinderpest in the 1950's and eradicated the disease by the 1960's [73]. Inoculations  
861 against rinderpest for cattle continued. Subsequently there was an outbreak in 1982 that affected  
862 buffalo, eland and giraffe, but not cattle [32]. Despite the losses from rinderpest during 1982, the  
863 buffalo population increased steadily from 1980 and had doubled by 1987.

864

865 Rinderpest was also a significant source of mortality in the adjacent Serengeti ecosystem and the  
866 inoculation campaigns appear to have reduced mortality in both wildebeest populations. From  
867 1963 to 1974 the Serengeti migratory wildebeest population tripled in size [74]. During the same  
868 time the more sedentary population in Ngorongoro Crater increased from roughly 7,600  
869 wildebeest to about 14,000.

870

871 In 2000 and 2001 there was significant mortality in buffalo (1500), wildebeest (250) and zebra  
872 (100) apparently due to nutritional stress resulting from the severe drought in the dry season in  
873 2000 [2, 39,75] .

874

875 In 2001, five black rhinos died in January and five lions during February [62]. The reports  
876 indicated that three of the black rhinos died from *Babesiosis* [75]. Nijhof et al [75] analysed  
877 samples from Ngorongoro (Bahati and Maggie) and a dead black rhino (Benji) from Addo



878 Elephant National Park. Sequence analyses of the sample from Bahati's brain revealed a novel  
879 species that was named *Babesia bicornis* ap.nov. Subsequent analyses showed that both Maggie  
880 and Benji were positive for *Babesia bicornis* ap.nov. Hence, *Babesia bicornis* ap.nov. may be a  
881 species new to the Ngorongoro Crater and the Serengeti ecosystem. Two black rhino were  
882 translocated from Addo Elephant National Park to Ngorongoro Crater in 1997. The translocation  
883 that was done to enhance the Ngorongoro black rhino population may have had negative  
884 repercussions by introducing a new tick borne disease. The impact of the novel parasite, *Babesia*  
885 *bicornis* ap.nov., may have been exacerbated by drought and high tick densities. The literature  
886 indicates that *Babesia bicornis* can cause fatal babesiosis [75]. The remaining 10 black rhinos  
887 were treated with a curative babesicidal drug and survived [39].

888  
889 However, in the case of the buffalo mortalities, high tick burdens and tick borne protozoal  
890 diseases may have been contributing factors [75]. A limited survey of the buffalo, wildebeest and  
891 lions that died in 2001 did not reveal the presence of *Babesia bicornis* ap.nov. Lion necropsy's  
892 revealed the presence of tick borne parasites (*Ehrlichia* spp., *Babesia* and *Theileria* sp) but  
893 canine distemper and a plague of *Stomoxys* stinging flies were also implicated and the cause of  
894 mortality has not been determined [39].

895  
896 Prescribed burning was started in the dry season of 2001 and research was done on tick densities,  
897 vegetation structure and tick host preference in adjacent burned and unburned areas [39]. Before  
898 burning, most adult ticks were present in the wet season (May to June) and most immature ticks  
899 occurred during the dry season (September, October). There were significantly more adult ticks  
900 in the tall grass in the wet season and significantly more immature ticks in the less grazed areas

901 in the dry season. In 2001, the mean tick density in tall grass (>50cm) was  $57 \pm 6.93/m^2$  (adults,  
902 wet season) and in less grazed (>20 cm) areas  $961 \pm 146 /m^2$  (immature, dry season). Twenty-  
903 seven months (2004) later there was a significant difference between burned and unburned areas,  
904 with almost no adult ticks and relatively few immature ticks in the burned areas. However, the  
905 unburned areas also had much lower adult tick and immature tick densities than that recorded in  
906 2001.

907

## 908 **Conclusions**

909

910 Ngorongoro Crater has an annual rainfall cycle period of about 5 years. Oscillations in annual,  
911 wet and dry season rainfall were statistically significant. The oscillations are associated with  
912 recurrent severe droughts that cause food scarcity and hence nutritional stress for the large  
913 herbivores. Rainfall oscillations imply that large herbivores are exposed to above average food  
914 supply for about 2.5 years and to below average food supply for the subsequent 2.5 years. High  
915 rainfall supports above-average production of plant biomass which may be of low quality due to  
916 the dilution of plant nutrients.

917

918 In 1974 there was a perturbation in that resident Maasai and their livestock were removed from  
919 the Crater. Vegetation maps from before and after the removal of pastoralists and their livestock  
920 indicate that major changes in vegetation structure occurred. The 1995 vegetation map shows  
921 that there was a significant change in the vegetation structure of the Crater floor, such that there  
922 was a decrease in the availability of short grasses and an increase in medium and tall grassland.

923

924 Temporal variation in herbivore numbers in the Crater followed four general patterns. First,  
925 buffalo, elephant and ostrich numbers increased significantly in the Crater from 1974-2012.  
926 Second, the overall average number of zebra in the Crater appeared stable whereas numbers of  
927 the other eight species declined substantially between 1974 and 2012 relative to their peak  
928 numbers during 1974-1976. Third, numbers of both gazelles, eland, kongoni, waterbuck (wet  
929 season only) and black rhino declined significantly in the Crater in both seasons following the  
930 removal of the Maasai and their cattle from the Crater in 1974. The decline in black rhino is  
931 mainly attributed to poaching in the 1970's and 1980's. Fourth, wildebeest numbers decreased in  
932 the Crater between 1974 and 2012 but this decrease was not statistically significant. In addition,  
933 some herbivore species were consistently more abundant inside the Crater during the wet than  
934 the dry season. This pattern was most evident for the large herbivore species requiring bulk  
935 forage, comprising buffalo, eland, elephant and black rhino. The latter may spend less time in the  
936 swamps and the forest during the wet season and may be easier to count. Even with a change in  
937 grassland structure, total herbivore biomass remained relatively stable from 1963 to 2012,  
938 implying that the Crater has a stable multi-herbivore community.

939

940 Rainfall significantly influenced herbivore abundance in Ngorongoro Crater and this influence  
941 varied with species and season. Herbivores responded to rainfall variation in three different ways  
942 in both seasons. In the wet season, numbers of herbivore species either decreased (wildebeest,  
943 eland, kongoni, waterbuck and rhino), increased (zebra, buffalo, ostrich and elephant) or  
944 increased up to intermediate levels of rainfall and then decreased with further increase in rainfall  
945 (both gazelles and warthog). Similarly, in the dry season the numbers of the herbivore species  
946 either decreased (both gazelles and waterbuck), increased (wildebeest, zebra, buffalo, ostrich and

947 warthog) or increased up to intermediate levels of rainfall and then decreased with further  
948 increase in rainfall (eland, kongoni, elephant and rhino).

949  
950 The relationships established between the time series of historic animal counts in the wet and dry  
951 seasons and lagged wet and dry season rainfall series were used to forecast the likely future  
952 trajectories of the wet and dry season population size for each species under three alternative  
953 climate change scenarios. They suggest strong interspecific contrasts regarding the scenario  
954 under which each species will likely perform best but broad similarities exist between seasons  
955 for each scenario.

956  
957 There is information on the population trends of the two major predators, i.e. lions and spotted  
958 hyenas. It would be useful to correlate predator impact on herbivore populations with rainfall.  
959 Disease is an important perturbation in the population trends of lions and spotted hyenas and  
960 potentially Black rhino, Cape buffalo and other herbivores. Tick borne diseases can potentially  
961 be managed with systematic burning of some grassland areas.

962

### 963 **Acknowledgements**

964 JOO was supported by a grant from the German National Research Foundation (Grant No. OG  
965 83/1-1). JOO was also supported The Planning for Resilience in East Africa through Policy,  
966 Adaptation, Research, and Economic Development (USAID PREPARED) project. This project  
967 has received funding from the European Union's Horizon 2020 research and innovation  
968 programme under Grant Agreement No. 641918. PDM is grateful for permission from the  
969 Tanzania Commission for Science and Technology (COSTECH) and the Tanzania Wildlife

970 Research Institute (TAWIRI) to conduct long-term research in the Serengeti–Ngorongoro  
971 ecosystem. TAWIRI, the Tanzania National Parks Authority (TANAPA) and the Ngorongoro  
972 Conservation Area Authority (NCAA) have provided important support for this research.

973

## 974 **References**

975 1. Estes RD, Small R (1981) The large herbivore populations of Ngorongoro Crater. In:  
976 Proceedings of the Fourth Annual African Wildlife Symposium. African Journal of Ecology 19:  
977 175–185.

978

979 2. Estes RD, Atwood JL, Estes AB (2006) Downward trends in Ngorongoro Crater ungulate  
980 populations 1986-2005: Conservation concerns and the need for ecological research. Biological  
981 Conservation 131:106-120.

982

983 3. Turner M, Watson RM (1964) A census of game in Ngorongoro Crater. East African Wildlife  
984 Journal 2:165-168.

985

986 4. Kruuk H (1972) The spotted hyena: A study of pedation and social behavior. Chicago:  
987 University of Chicago Press.

988

989 5. Höner OP, Wachter B, East ML, Runyoro VA, Hofer H (2005) The effect of prey abundance  
990 and foraging tactics on the population dynamics of a social, territorial carnivore, the spotted  
991 hyena. Oikos 108: 544–554.

992

- 993 **6.** Pusey AE, Packer C (1987) Philopatry and dispersal in lions. *Behaviour* 101:275-310.  
994
- 995 **7.** Packer C, Pusey AE, Rowley H, Gilbert DA, Martenson J, O'Brien SJ (1991) Case Study of a  
996 Population Bottleneck: Lions of the Ngorongoro Crater. *Conservation Biology* 5: 219-230.  
997
- 998 **8.** Kissui BM, Packer C (2004) Top-down population regulation of a top predator: lions in the  
999 Ngorongoro Crater. *Proceedings of the Royal Society of London* 271: 1867-1874.  
1000
- 1001 **9.** Ngorongoro Conservation Unit (1967) Annual report 1967. Dar es Salaam, Tanzania: Ministry  
1002 of Agriculture and co-operative, Tanzania.  
1003
- 1004 **10.** Ngorongoro Conservation Area Authority (1985) Annual reports 1968-1985. Dar es Salaam,  
1005 Tanzania: Ministry of Agriculture and co-operative, Tanzania.  
1006
- 1007 **11.** Rose GA (1975) Buffalo increase and seasonal use of Ngorongoro Crater. *East African*  
1008 *Wildlife Journal* 13:385-87.  
1009
- 1010 **12.** Runyoro VA, Hofer H, Chausi E, Moehlman PD (1995) Long-term trends in the herbivore  
1011 populations of the Ngorongoro Crater, Tanzania. In: Sinclair, A.R.E., Arcese, P. (Eds.),  
1012 *Serengeti II*. Univ. Chicago Press, Chicago, pp. 146–168.  
1013
- 1014 **13.** Moehlman PD, Runyoro VA, Hofer H (1997) Wildlife population trends in the Ngorongoro  
1015 Crater. In: Thompson, D.M. (Ed.), *Multiple Land-Use: the Experience of the Ngorongoro*

- 1016 Conservation Area, Tanzania. IUCN Protected Areas Programme, IUCN, Gland, Switzerland  
1017 and Cambridge, UK, pp.59–70.  
1018
- 1019 **14.** Herlocker DJ, Dirschl HJ (1972) Vegetation of the Ngorongoro Conservation Area. Can.  
1020 Wildlife Service Report Series no. 19. pp 1-39.  
1021
- 1022 **15.** Anderson GD, Herlocker DJ (1973) Soil factors affecting the distribution of the vegetation  
1023 types and their utilization by wild animals in Ngorongoro Crater, Tanzania. *Journal of Ecology*  
1024 61: 627-651.  
1025
- 1026 **16.** Homewood KM, Rodgers WA (1991) *Maasailand ecology*. Cambridge: Cambridge  
1027 University Press.  
1028
- 1029 **17.** Fosbrooke H (1986) Fire! Master or servant? *Swara* 9(2):12-16.  
1030
- 1031 **18.** Demment MW, van Soest PJ (1985) A nutritional explanation for body-size patterns of  
1032 ruminant and non-ruminant herbivores. *American Naturalist* 125: 641–672.  
1033
- 1034 **19.** Sinclair ARE, Norton-Griffiths M (1979) *Serengeti: Dynamics of an ecosystem*, Chicago:  
1035 University of Chicago Press.  
1036
- 1037 **20.** Sinclair ARE (1977) *The African buffalo: A study of resource limitation of populations*.  
1038 Chicago: University of Chicago Press.

1039

1040 **21.** Gogan P (1973) Some aspects of nutrient utilization by Burchell's zebra (*Equus burchelli*  
1041 *bohmi* Matschie) in the Serengeti-Mara region, East Africa MSc thesis. Texas A & M College.  
1042 College Station, Texas. 85pp.

1043

1044 **22.** Gagnon M, Chew AE (2000) Dietary preferences in extant African bovidae. Journal of  
1045 Mammalogy 81: 490-511.

1046

1047 **23.** Andere DK (1981) Wildebeest *Connochaetes taurinus* (Burchell) and its food supply in  
1048 Amboseli Basin. African Journal of Ecology 19: 239-250.

1049

1050 **24.** Cerlin TE, Harris JM, Passey BH (2003) Diet of east African Bovidae based on stable  
1051 isotope analysis. Journal of Mammalogy 84: 456-470.

1052

1053

1054 **25.** Jarman PJ, Sinclair ARE (1979) Feeding strategy and the pattern of resource partitioning in  
1055 ungulates. In Serengeti: Dynamics of an ecosystem, ed. A.R.E. Sinclair and M. Norton-Griffiths,  
1056 130-63. Chicago: University of Chicago Press.

1057

1058 **26.** McNaughton SJ, Georgiadis NJ (1986) Ecology of African grazing and browsing mammals.  
1059 Annual Review of Ecology and Systematics 17: 39-65.

1060



- 1061 **27.** Prins HHT, Douglas-Hamilton I (1990) Stability in a multi-species assemblage of large  
1062 herbivores in East Africa. *Oecologia* 83: 392-400.  
1063
- 1064 **28.** Milton SJ, Dean RJ, Siegfried WR (1994) Food Selection by Ostrich in Southern Africa. *The*  
1065 *Journal of Wildlife Management* 58: 234-248.  
1066
- 1067 **29.** Ngorongoro Ecological Monitoring Programme (1987) Semi-annual report. Ngorongoro:  
1068 Ngorongoro Conservation Area Authority. Unpublished report.  
1069
- 1070 **30.** Ngorongoro Ecological Monitoring Programme (1988) Semi-annual report. Ngorongoro:  
1071 Ngorongoro Conservation Area Authority. Unpublished report.  
1072
- 1073 **31.** Ngorongoro Ecological Monitoring Programme (1988) Annual report. Ngorongoro:  
1074 Ngorongoro Conservation Area Authority. Unpublished report.  
1075
- 1076 **32.** Ngorongoro Ecological Monitoring Programme (1989) Annual report. Ngorongoro:  
1077 Ngorongoro Conservation Area Authority. Unpublished report.  
1078
- 1079 **33.** Ngorongoro Ecological Monitoring Programme (1990) Annual report. Ngorongoro:  
1080 Ngorongoro Conservation Area Authority. Unpublished report.  
1081
- 1082 **34.** Ngorongoro Ecological Monitoring Programme (1991) Annual report. Ngorongoro:  
1083 Ngorongoro Conservation Area Authority. Unpublished report.

- 1084
- 1085 **35.** Norton-Griffiths M (1978) Counting animals. 2nd edition. Handbook no.1. Techniques in  
1086 African Wildlife Ecology. Nairobi: African Wildlife Foundation.
- 1087
- 1088 **36.** Ecosystems Ltd (1980) The status and utilization of wildlife in Arusha Region, Tanzania:  
1089 Final report. Nairobi: Ecosystems Ltd. Unpublished report
- 1090
- 1091 **37.** Coe MJ, Cumming DH, Phillipson J (1976) Biomass and production of large African  
1092 herbivores in relation to rainfall and primary production. *Oecologia* 22:341-54.
- 1093
- 1094 **38.** Chuwa S, Moehlman PD (1996) The Vegetation of Ngorongoro Crater (1:50,000 map).  
1095 Unpublished.
- 1096
- 1097 **39.** Fyumagwa RD, Runyoro V, Horak IG, Hoare R (2007) Ecology and control of ticks as  
1098 disease vectors in wildlife of the Ngorongoro Crater, Tanzania. *South African Journal of*  
1099 *Wildlife Research* 37: 79–90.
- 1100
- 1101 **40.** Van Vuuren DP, Edmonds J, Kainuma M, Riahi K, Thomson A, Hibbard K, Hurtt GC, Kram  
1102 T, Krey V, Lamarque J.-F (2011) The representative concentration pathways: an overview.  
1103 *Climatic Change* 109: 5.
- 1104

- 1105 **41.** Wise M, Calvin K, Thomson A, Clarke L, Bond-Lamberty B, Sands R, Smith SJ, Janetos A,  
1106 Edmonds J (2009) Implications of Limiting CO<sub>2</sub> Concentrations for Land Use and Energy.  
1107 Science 324: 1183-1186.  
1108
- 1109 **42.** Riahi K, Rao S, Krey V, Cho C, Chirkov V, Fischer G, Kindermann G, Nakicenovic N, Rafaj  
1110 P (2011) RCP8.5 - A scenario of comparatively high greenhouse gas emissions. Climatic Change  
1111 109: 33.  
1112
- 1113 **43.** Eilers PHC, Marx BD (1996) Flexible Smoothing with B-Splines and Penalties, with  
1114 discussion. Statistical Science 11: 89-121.  
1115
- 1116 **44.** De Boor C (2001) A Practical Guide to Splines, Rev. Edition, New York: Springer-Verlag.  
1117
- 1118 **45.** Ruppert D, Wand MP, Carroll RJ (2003) Semiparametric Regression, Cambridge:  
1119 Cambridge University Press.  
1120
- 1121 **46.** Wolfinger R, O'Connell M (1993) Generalized linear mixed models a pseudo-  
1122 likelihood approach. Journal of Statistical Computation and Simulation 48: 233-243.  
1123
- 1124 **47.** SAS Institute Inc. (2018) SAS system for windows, version 9.4. SAS Institute Inc., Carey,  
1125 NC, USA.  
1126

- 1127 **48.** Ogutu JO, Piepho H-P, Said MY, Ojwang GO, Njino LW, Kifugo SC, Wargute PW (2016)  
1128 Extreme wildlife declines and concurrent increase in livestock numbers in Kenya. PloS one,  
1129 11(9), e0163249.  
1130
- 1131 **49.** Kenward MG, Roger JH (1997) Small Sample Inference for Fixed Effects from Restricted  
1132 Maximum Likelihood. *Biometrics* 53: 983–997.  
1133
- 1134 **50.** Westfall P H (1997) Multiple Testing of General Contrasts Using Logical Constraints and  
1135 Correlations. *Journal of the American Statistical Association* 92: 299 - 306.  
1136
- 1137 **51.** Durbin J, Koopman SJ (2012) *Time Series Analysis by State Space Methods*. Oxford, UK:  
1138 Oxford University Press.  
1139
- 1140 **52.** Ogutu JO, Piepho H-P, Dublin HT, Bhola N, Reid RS (2008) El Niño-southern oscillation,  
1141 rainfall, temperature and normalized difference vegetation index fluctuations in the  
1142 Mara-Serengeti ecosystem. *African Journal of Ecology* 46: 132–143.  
1143
- 1144 **53.** Rutherford MC (1980) Annual plant production–precipitation relations in arid and semi-arid  
1145 regions. *South African Journal of Science* 76: 53–56.  
1146
- 1147 **54.** Desmukh IK (1984) A common relationship between precipitation and grassland peak  
1148 biomass for East and southern Africa. *African Journal of Ecology* 22: 181–186.  
1149

- 1150 **55.** Boutton TW, Tieszen LL, Imbamba SK (1988) Seasonal changes in the nutrient of East  
1151 African grassland vegetation. *African Journal of Ecology* 26: 103–115.  
1152
- 1153 **56.** East R (1984) Rainfall, soil nutrient status and biomass of large African savanna mammals.  
1154 *African Journal of Ecology* 22: 245–270.  
1155
- 1156 **57.** Fritz H, Duncan P (1994) On the carrying capacity for large ungulates of African Savanna  
1157 ecosystems. *Proceedings of the Royal Society, B* 256: 77–82.  
1158
- 1159 **58.** Ogutu JO, Piepho HP, Dublin HT, Bhola N, Reid RS (2008). Rainfall influences on Ungulate  
1160 population abundance in the Mara-Serengeti ecosystem. *Journal of Animal Ecology* 77: 814-829.  
1161
- 1162 **59.** Burnham KP, Anderson DR (2002) Model selection and multi-model inference: a  
1163 Practical information-theoretic approach, 2nd ed. Springer-Verlag, New York.  
1164
- 1165 **60.** Hopcraft JGC, Sinclair ARE, Packer C (2005) Planning for success: Serengeti lions seek  
1166 prey accessibility rather than abundance. *Journal of Animal Ecology* 74: 559-566.  
1167
- 1168 **61.** Trollope WSW (1995) Report on the fire ecology of the Ngorongoro Conservation Area in  
1169 Tanzania with particular reference to the Ngorongoro Crater. Report to NCAA Conservator.  
1170
- 1171 **62.** Trollope WSW, Trollope LA (2001) Relationship between range condition and the incidence  
1172 of ticks in the Ngorongoro Crater in Tanzania. Report to NCAA Conservator.

1173

1174 **63.** Gichohi HW (1990) The effects of fire and grazing on grasslands of Nairobi National Park.

1175 MSc. Thesis. University of Nairobi.

1176

1177 **64.** Mwalyosi RBB (1992) Influence of livestock grazing on range condition in southwest

1178 Maasailand, Northern Tanzania. *Journal of Applied Ecology* 29:581-588.

1179

1180 **65.** Moehlman PD, Amato G, Runyoro V (1996) Genetic and demographic threats to the black

1181 rhinoceros population in the Ngorongoro Crater. *Conservation Biology* 10: 1107-1114.

1182

1183 **66.** Ogutu JO, Owen-Smith N, Piepho H-P, Kuloba B, Edebe J (2012) Dynamics of

1184 ungulates in relation to climatic and land use changes in an insularized African savanna

1185 ecosystem. *Biodiversity and Conservation* 21: 1033-1053.

1186

1187 **67.** Ogutu JO, Owen-Smith N, Piepho H-P, Said MY, Kifugo S, Reid RS, Andanje S (2013)

1188 Changing wildlife populations in Nairobi National Park and adjoining Athi-Kaputiei Plains:

1189 collapse of the migratory wildebeest. *Open Conservation Biology Journal* 7: 11-26.

1190

1191 **68.** Elliot JP, McTaggart Cowan I (1978) Territoriality, density, and prey of the lion in

1192 Ngorongoro Crater, Tanzania. *Canadian Journal of Zoology* 56:1726-34.

1193

- 1194 **69.** Hanby JP, Bygott JD, Packer C (1995) Ecology, demography and behavior of lions in two  
1195 contrasting habitats: Ngorongoro Crater and the Serengeti Plains. In: Sinclair, A.R.E., Arcese, P.  
1196 (Eds.), Serengeti II. University of Chicago Press, Chicago, pp.315–331.  
1197
- 1198 **70.** Höner OP, Wachter B, East ML, Hofer H (2002) The response of spotted hyaenas to long-  
1199 term changes in prey populations: functional response and interspecific kleptoparasitism. Journal  
1200 of Animal Ecology 71: 236–246.  
1201
- 1202 **71.** Höner OP, Wachter B, Goller KV, Hofer H, Runyoro V, Thierer D, Fyumagwa RD, Müller  
1203 T, East ML (2011) The impact of a pathogenic bacterium on a social carnivore population.  
1204 Journal of Animal Ecology 81: 36-46. doi: 10.1111/j.1365-2656.2011.01873.x.  
1205
- 1206 **72.** Kiwia HD (1989) Black rhinoceros (*Diceros bicornis* [L.]) Population size and structure in  
1207 Ngorongoro Crater. African Journal of Ecology 27:1- 6.  
1208
- 1209 **73.** Machange J (1997) Livestock and wildlife interactions. In: Thompson, D.M. (Ed.), Multiple  
1210 Land-Use: The Experience of the Ngorongoro Conservation Area, Tanzania. IUCN, Gland,  
1211 Switzerland and Cambridge, UK, pp. 127–141.  
1212
- 1213 **74.** Sinclair ARE (1979) The eruption of the ruminants. In Serengeti: Dynamics of an ecosystem,  
1214 ed. A.R.E. Sinclair and M. Norton-Griffiths, 104-29. Chicago: University of Chicago Press.  
1215

1216 75. Nijhof AM, Penzhorn BL, Lynen G, Mollel JO, Morkel P, Bekker CPJ, Jongejan F (2003)  
1217 Babesia biconis sp. Nov. and Theileria bicornis sp. nov.: Tick-Borne Parasites Associated with  
1218 Mortality in the Black Rhinoceros (*Diceros bicornis*). Journal of Clinical Microbiology 41:2249-  
1219 2254.

1220

## 1221 **Figure legends**

1222

1223 **Fig 1. Ngorongoro Crater and Census Blocks [12]).**

1224

1225 **Fig 2. The distribution of a) total monthly rainfall (mean  $\pm$  1sd = 78.3  $\pm$  84.2 mm) across**

1226 **months in the Ngorongoro Crater National Park averaged over 1963-2014 and the**

1227 **interannaul variation in standardized deviations of the b) annual rainfall (mean  $\pm$  1SD**

1228 **=937.5  $\pm$  300.7 mm), c) wet season rainfall (mean $\pm$  1SD =851.7  $\pm$  297.3 mm), and d) dry**

1229 **season rainfall (mean $\pm$  1SD =85.5  $\pm$  65.2 mm) in the Ngorongoro Crater during 1963-2014.**

1230 The vertical needles are the standardized deviates, the solid curves are the 5-year (annual and wet

1231 season) and 2-year (dry season) moving averages and the dashed horizontal lines are percentiles

1232 of the frequency distributions of the rainfall deviates.

1233

1234

1235 **Fig 3. Trends in the population sizes of the 12 most common large herbivore species in the**

1236 **Ngorongoro Crater in the wet and dry seasons from 1964 to 2012.** The vertical needles

1237 denote wet season (solid) and dry season (dashed) count totals. Thick solid and dashed curves



1238 denote the fitted wet season and dry season trend curves. The shaded regions are the 95% point  
1239 wise confidence bands.

1240

1241 **Fig 4. Temporal trends in the cumulative total biomass (kg) of the 12 most common large**  
1242 **herbivore species in the Ngorongoro Crater during a) the wet season and b) the dry season**  
1243 **during 1964 to 2012.** The unit weights (kg) are 1725, 816, 450, 340, 200, 160, 125, 123, 114,  
1244 45, 40 and 15 for elephant, rhino, buffalo, eland, zebra, waterbuck, kongoni, wildebeest, ostrich,  
1245 warthog, Grant's gazelle and Thomson's gazelle, respectively. Note that wildebeest and zebra  
1246 were not counted in the dry season of 1968. In years when multiple surveys were done in the  
1247 same season (e.g., the wet season of 1966 or 1970), only the survey with the maximum count  
1248 was used to calculate biomass.

1249

1250 **Fig 5. The selected best regression relationships between the wet season and dry season**  
1251 **count totals of wildebeest, zebra, Thomson's gazelle, buffalo, Grant's gazelle, and eland**  
1252 **and the moving averages of the annual, wet season and dry season rainfall components for**  
1253 **the Ngorongoro Crater during 1964-2012.**

1254

1255 **Fig 6. The selected best regression relationships between the wet season and dry season**  
1256 **count totals of kongoni, waterbuck, ostrich, elephant, black rhino and warthog and the**  
1257 **moving averages of the annual, wet season and dry season rainfall components for the**  
1258 **Ngorongoro Crater during 1964-2012.**

1259

1260 **Fig 7. Historic and projected population size of buffalo in the Ngorongoro Crater during**  
1261 **the wet and dry seasons based on the three climate change scenarios RCP2.6, RCP4.5 and**  
1262 **RCP8.5.**

1263

1264 **Fig 8. Historic and projected population size of wildebeest in the Ngorongoro Crater**  
1265 **during the wet and dry seasons based on the three climate change scenarios RCP2.6,**  
1266 **RCP4.5 and RCP8.5.**

1267

1268 **Fig 9. Historic and projected population size of zebra in the Ngorongoro Crater during the**  
1269 **wet and dry seasons based on the three climate change scenarios RCP2.6, RCP4.5 and**  
1270 **RCP8.5.**

1271

1272 **Fig 10. Historic and projected population size of Thomson's gazelle in the Ngorongoro**  
1273 **Crater during the wet and dry seasons based on the three climate change scenarios**  
1274 **RCP2.6, RCP4.5 and RCP8.5.**

1275

1276 **Fig 11. Historic and projected population size of Grant's gazelle in the Ngorongoro Crater**  
1277 **during the wet and dry seasons based on the three climate change scenarios RCP2.6,**  
1278 **RCP4.5 and RCP8.5.**

1279

1280 **Supporting Information**

1281 **S1 Data. The count totals for each of the 12 most common large herbivore species counted**  
1282 **during the wet and the dry seasons in the Ngorongoro Crater from 1964 to 2012.**

1283

1284 **S2 Data. The count totals for each of the 12 most common large herbivore species counted**

1285 **during the wet and the dry seasons in the Ngorongoro Crater from 1964 to 2012.** The

1286 missing values were imputed using a state space model, separately for each species and season

1287 combination.

1288

1289 **S3 Data. Total monthly rainfall in mm recorded at the Ngorongoro Conservation Area**

1290 **headquarters from 1963 to 2014.**

1291

1292 **S4 Data. The logarithm of the observed and predicted population size for each of the five**

1293 **most common species for the wet and dry season and the 95% pointwise prediction**

1294 **confidence band for 1964 to 2012.** The logarithm of the forecasted population size is also

1295 provided for each of the five most abundant herbivore species for 2013 to 2100.

1296

1297 **Table S1. Parameter estimates for the bivariate VARMAX (2,2,5) model for the five most**

1298 **abundant herbivore species in the dry and wet seasons in the Ngorongoro Crater,**

1299 **Tanzania, during 1963-2012.** Model selection was based on information theory so no effort has

1300 been made to remove insignificant coefficients. By restricting a few of the highly insignificant

1301 coefficients to be zero, many of the apparently insignificant coefficients become significant.

1302

1303 **Table S2. Roots of AR characteristic polynomials for the bivariate model for the five most**

1304 **abundant herbivore species in the dry and wet seasons in the Ngorongoro Crater,**

1305 **Tanzania, during 1963-2012.** The modulus of the roots of its AR polynomial should be less  
1306 than 1 for a time series to be stationary.

1307

1308 **Table S3. Roots of the MA characteristic polynomials for the bivariate model for the five**  
1309 **most abundant herbivore species in the dry and wet seasons in the Ngorongoro Crater,**  
1310 **Tanzania, during 1963-2012.**

1311

1312 **Table S4. Portmanteau Test for Cross Correlations of Residuals from the bivariate**  
1313 **VARMAX(2,2,5) model for the five most abundant herbivore species in the dry and wet**  
1314 **seasons in the Ngorongoro Crater, Tanzania, during 1963-2012.** The results show tests for  
1315 white noise residuals based on the cross correlations of the residuals. Insignificant test results  
1316 show that we cannot reject the null hypothesis that the residuals are uncorrelated.

1317

1318 **Table S5. Univariate model ANOVA diagnostics for the five most abundant herbivore**  
1319 **species in the dry and wet seasons in the Ngorongoro Crater, Tanzania, during 1963-2012.**  
1320 The results show that each model is significant.

1321

1322 **Table S6. Univariate Model White Noise Diagnostics for the five most abundant herbivore**  
1323 **species in the dry and wet seasons in the Ngorongoro Crater, Tanzania, during 1963-2012.**

1324 The results show tests of whether the residuals are correlated and heteroscedastic. The Durbin-  
1325 Watson test statistics test the null hypothesis that the residuals are uncorrelated. The Jarque-Bera  
1326 normality test tests the null hypothesis that the residuals are normally distributed. The F statistics

1327 and their  $p$ -values for ARCH(1) disturbances test the null hypothesis that the residuals have  
1328 equal covariances.

1329

1330 **Table S7. Univariate AR Model Diagnostics for the five most abundant herbivore species in**  
1331 **the dry and wet seasons in the Ngorongoro Crater, Tanzania, during 1963-2012.** The F  
1332 statistics and their  $p$ -values for AR(1), AR(1,2), AR(1,2,3) and AR(1,2,3,4) models of residuals  
1333 test the null hypothesis that the residuals are uncorrelated.

1334

1335 **Table S8. Classification of years and seasons into extreme drought, severe drought,**  
1336 **moderate drought, normal, wet, very wet and extremely wet years or seasons using**  
1337 **percentiles of the frequency distributions of the total annual, wet season or dry season**  
1338 **rainfall recorded at the Ngorongoro Conservation Area headquarters from 1963 to 2014.**

1339

1340 **Table S9. The estimated frequency, period, periodogram, spectral density, co-spectra,**  
1341 **quadrature, squared coherence, amplitude and phases of the oscillations in the annual, wet**  
1342 **and dry season rainfall components for the Ngorongoro Crater during 1963-2014.**

1343

1344 **Table S10. The estimated variances of the disturbance terms, the variances of the irregular**  
1345 **components, damping factor and periods of the cycles in the annual, wet and dry season**  
1346 **rainfall components recorded for the Ngorongoro Crater during 1963-2014.**

1347

1348 **Table S11. Significance analysis of components (based on the final state).**

1349

1350 **Table S12. The expected population size of each of the 12 wildlife species in 1964, 1974 and**  
1351 **2012 and the difference between the two estimates for 1964 and 1974 and 1974 and 2012**  
1352 **and test of significance of their difference based on constructed penalized cubic B-splines.**

1353

1354 **Table S13. Selection of the rainfall component, moving average and functional form of the**  
1355 **relationship between population size and the moving average component for each of the 12**  
1356 **most common large herbivore species based on the corrected Akaike Information Criterion**  
1357 **(AICc). Only models with delta AICc no more than 4 are shown. Model selection was**  
1358 **carried out separately for the wet and dry season counts for each species.**

1359

1360 **Table S14. Parameters estimates, their standard errors and *t*-tests of whether the**  
1361 **parameters are significantly different from zero for the AICc-selected best models relating**  
1362 **population size and moving average rainfall, for the wet and season counts, for the 12 most**  
1363 **common large herbivore species in the Ngorongoro Crater.**

1364

1365 **S1 Text. SAS code used to analyze the rainfall data for the Ngorongoro Conservation Area**  
1366 **headquarters.**

1367

1368 **S2 Text. SAS code used to model trends in the animal counts, relate the counts to rainfall**  
1369 **and project population dynamics to 2013-2100.**

1370

1371 **Fig S1. Temporal variation in the original and smoothed total monthly rainfall in the**  
1372 **Ngorongoro Crater from 1963 to 2014.**

1373

1374 **Fig S2. Percentiles of the annual, dry and wet season rainfall components. The percentiles**  
1375 **are used to classify years or seasons as extreme, severe or moderate drought years or**  
1376 **seasons, normal, wet, very wet or extremely wet years or seasons as described in the text.**

1377

1378 **Fig S3. Spectral density versus period of cycles (in years) for a) annual rainfall, b) wet**  
1379 **season rainfall, and c) dry season rainfall based on rainfall recorded for the Ngorongoro**  
1380 **Conservation Authority headquarters from 1963 to 2014. A large value of spectral density**  
1381 **means that the corresponding period has greater support in the data.**

1382

1383 **Fig S4. Smoothed cycles and trends based on the structural time series analysis versus the**  
1384 **year of observation for the standardized annual (annualstd), wet season (wetstd) and dry**  
1385 **season (drystd) rainfall for the Ngorongoro Crater for 1963-2014.**

1386

1387 **Fig S5. Projected total annual rainfall, average maximum and minimum temperatures for**  
1388 **Ngorongoro Crater in Tanzania under three climate scenarios (RCP2.6, RCP4.5 and**  
1389 **RCP8.5) for the period 2006-2100.**

1390

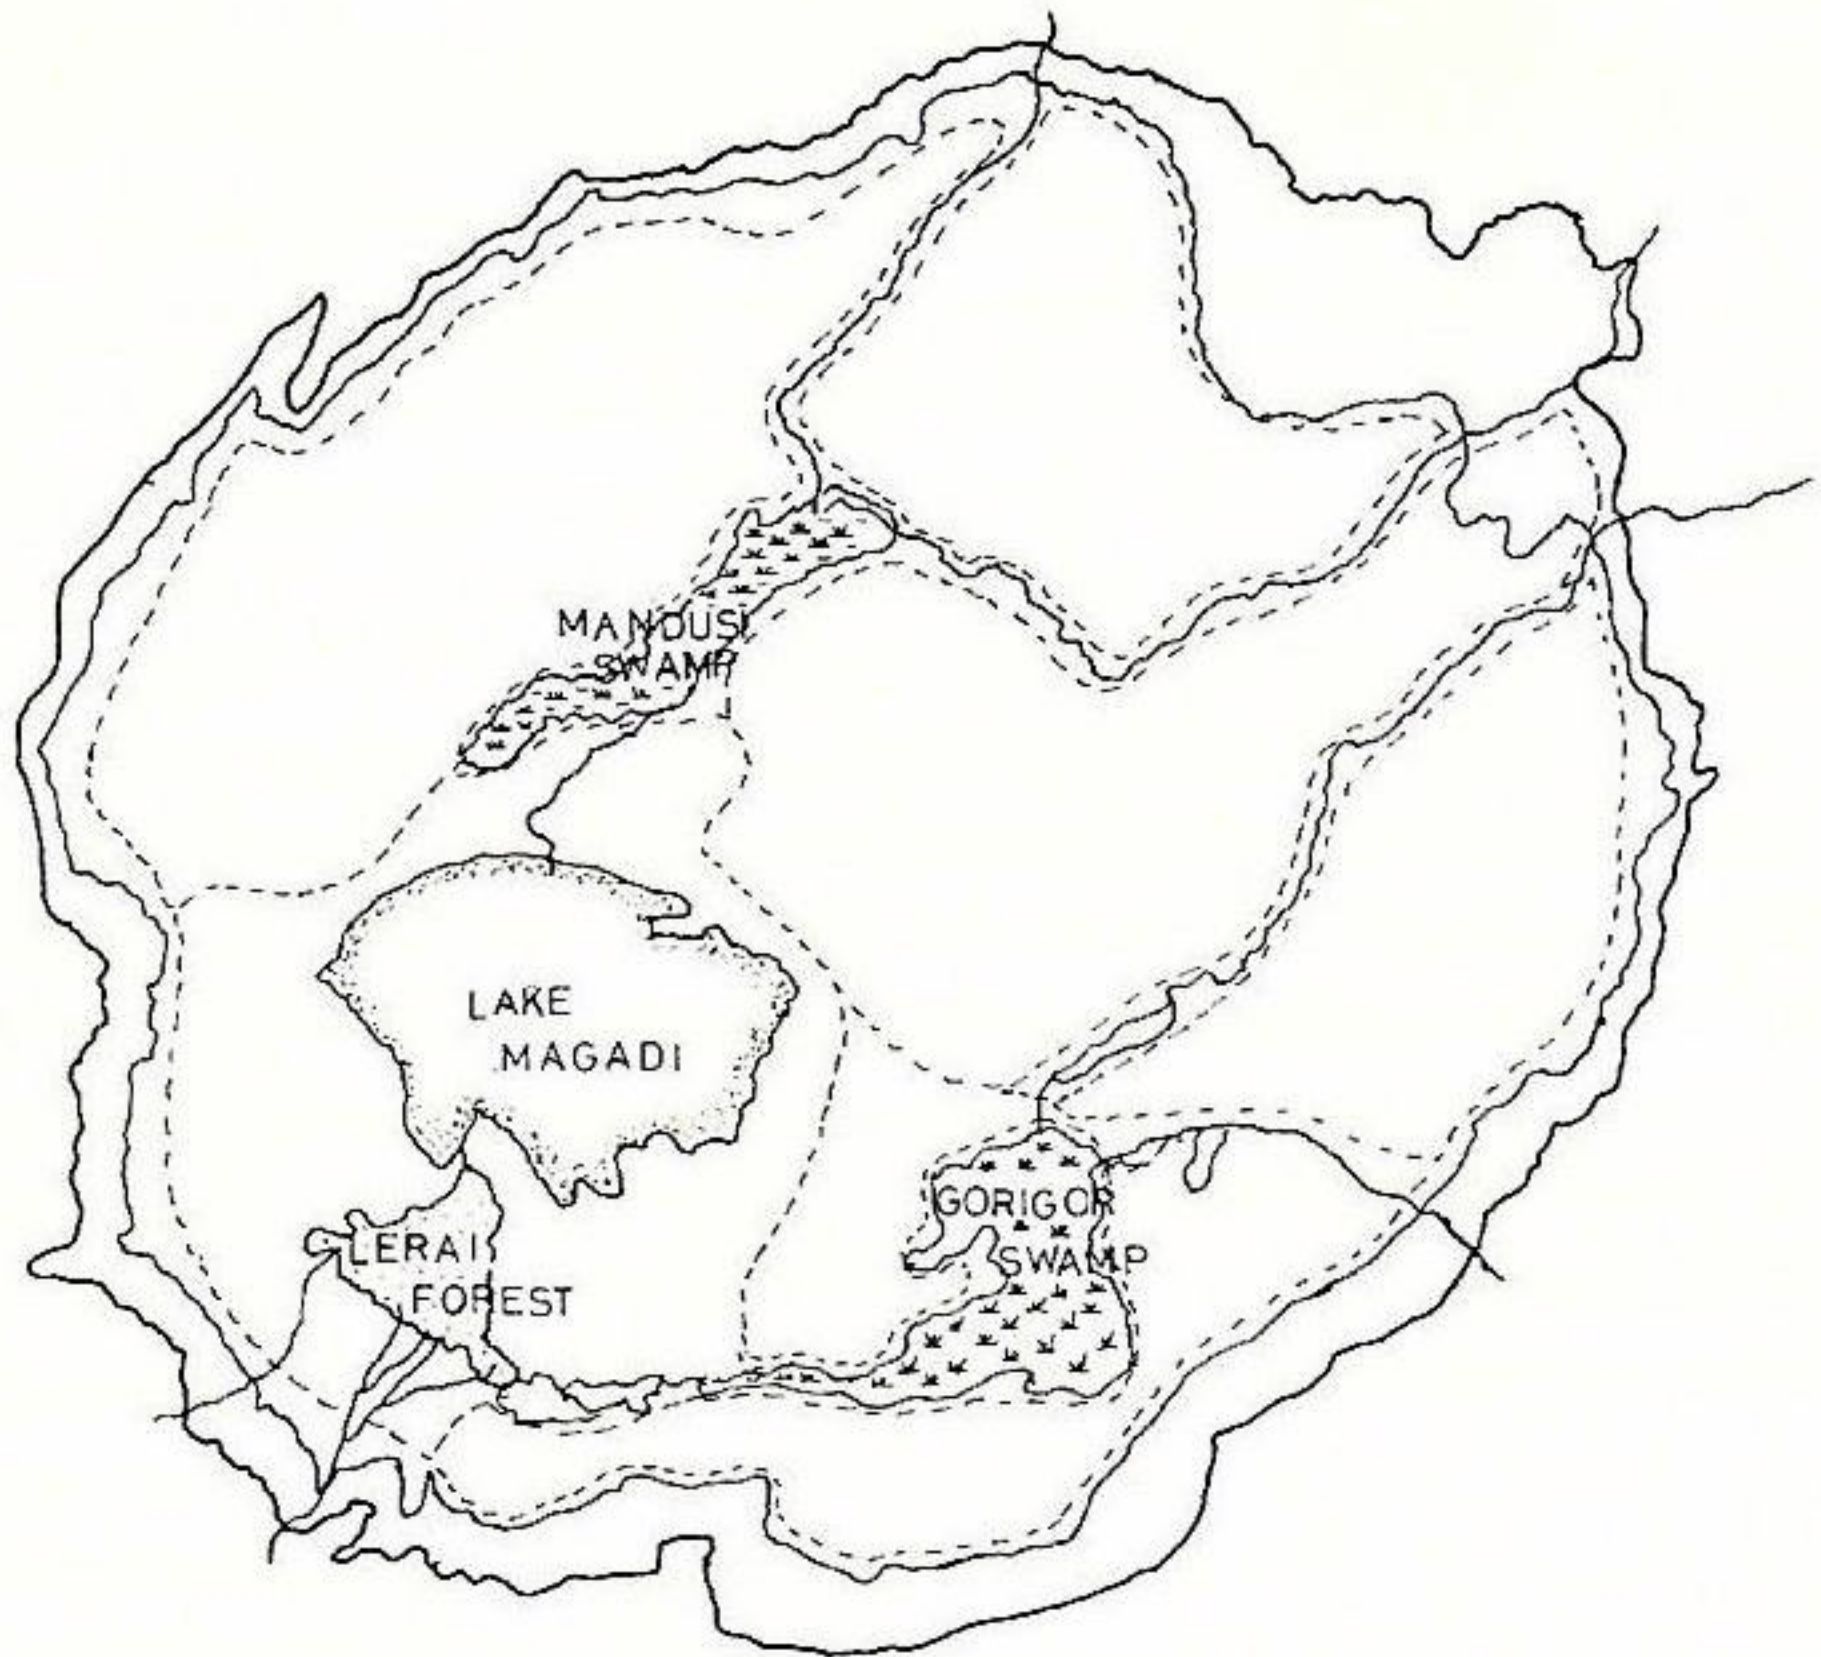

MANOUSI  
SWAMP

LAKE  
MAGADI

LERAI  
FOREST

GORIGOR  
SWAMP



Mean monthly rainfall (mean = 78.3 mm, SD = 84.2 mm)

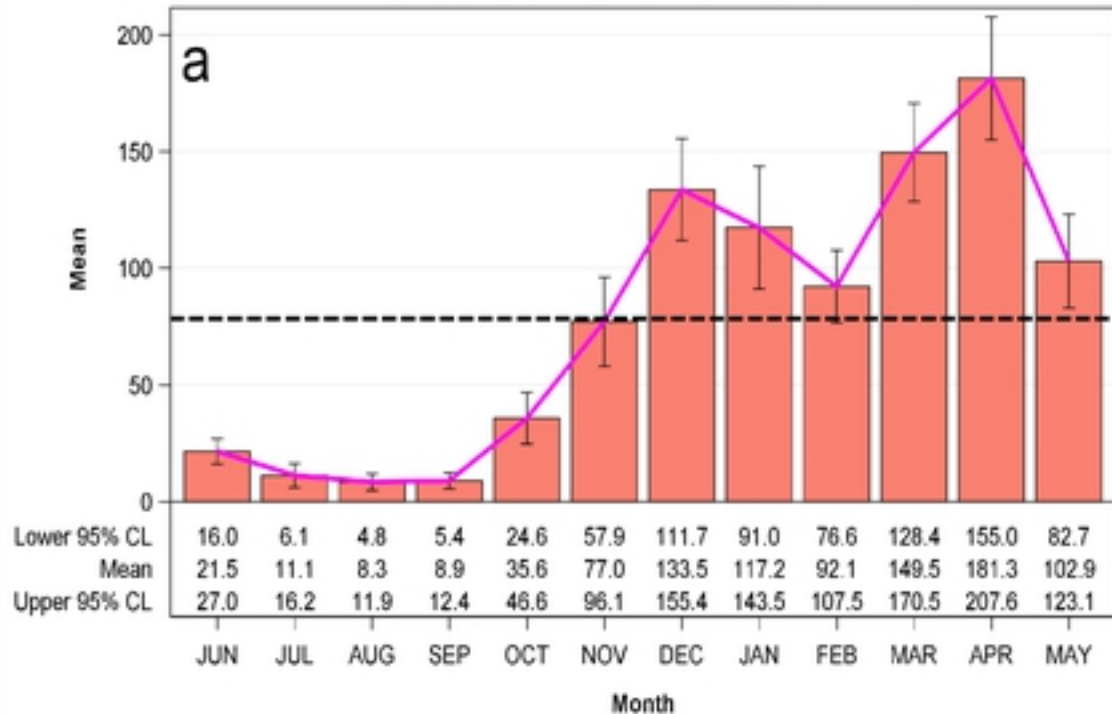

Wet season rainfall (mean = 851.7 mm, SD = 297.3 mm)

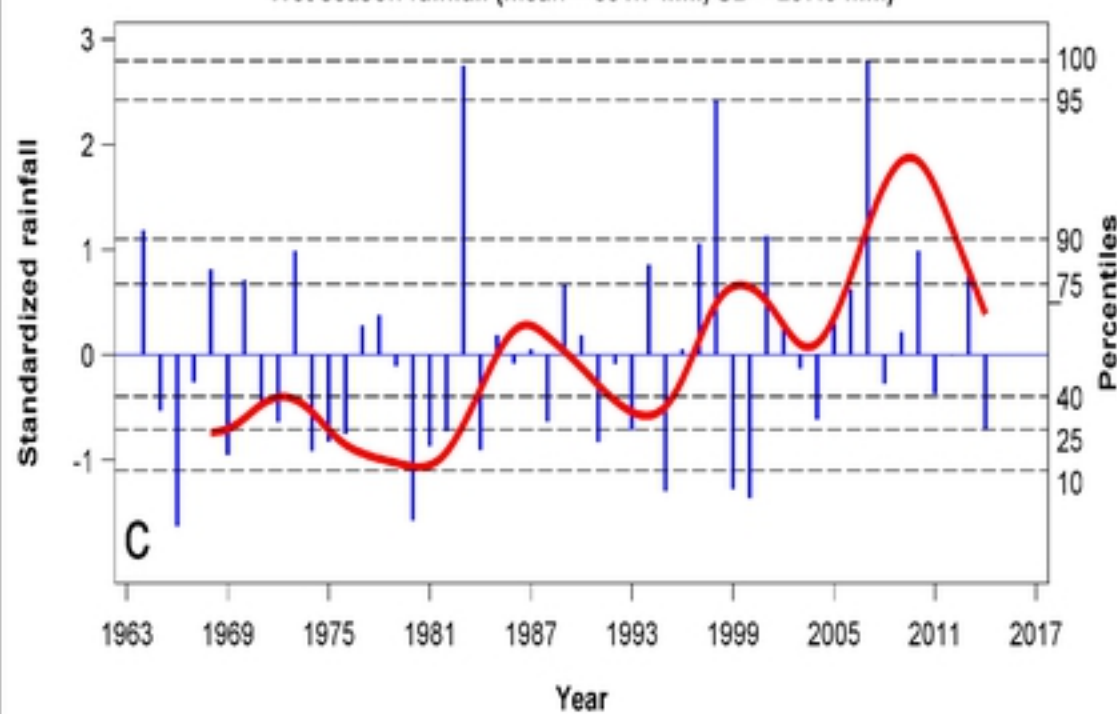

Annual rainfall (mean = 937.5 mm, SD = 300.7 mm)

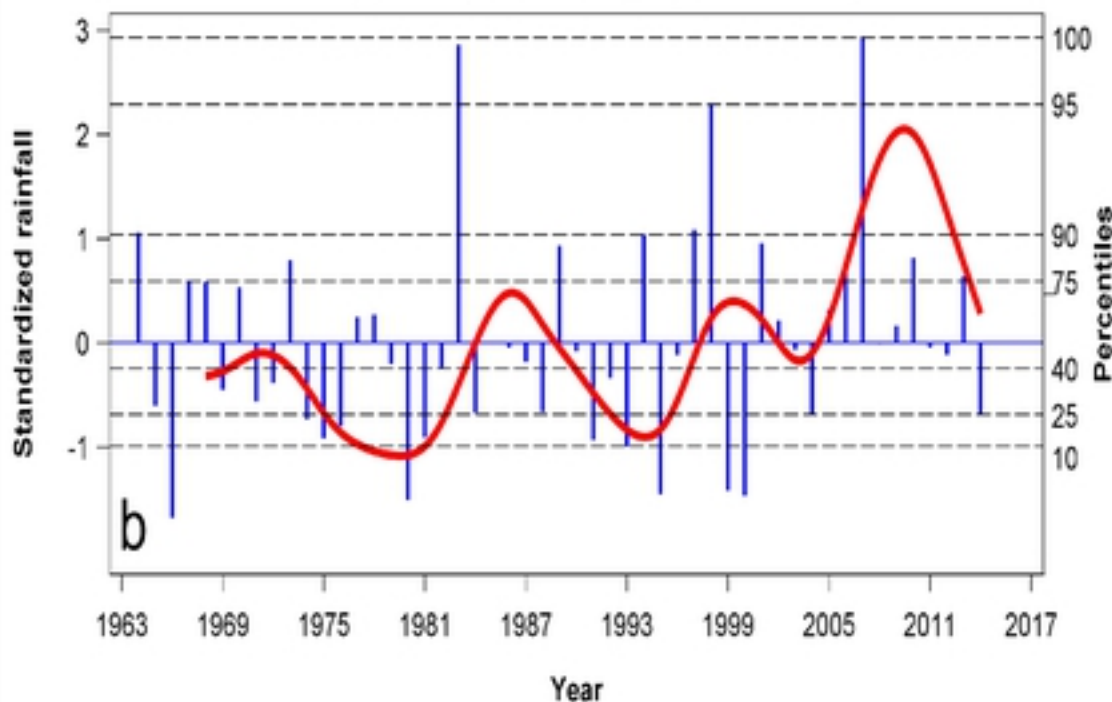

Dry season rainfall (mean = 85.5 mm, SD = 65.2 mm)

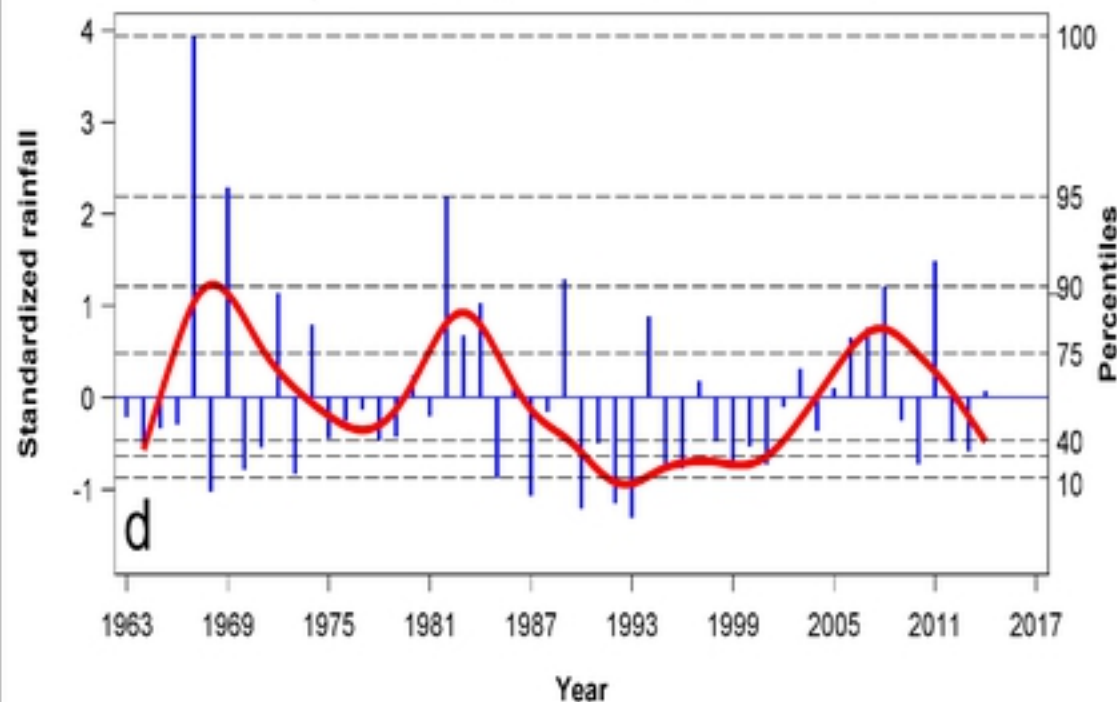

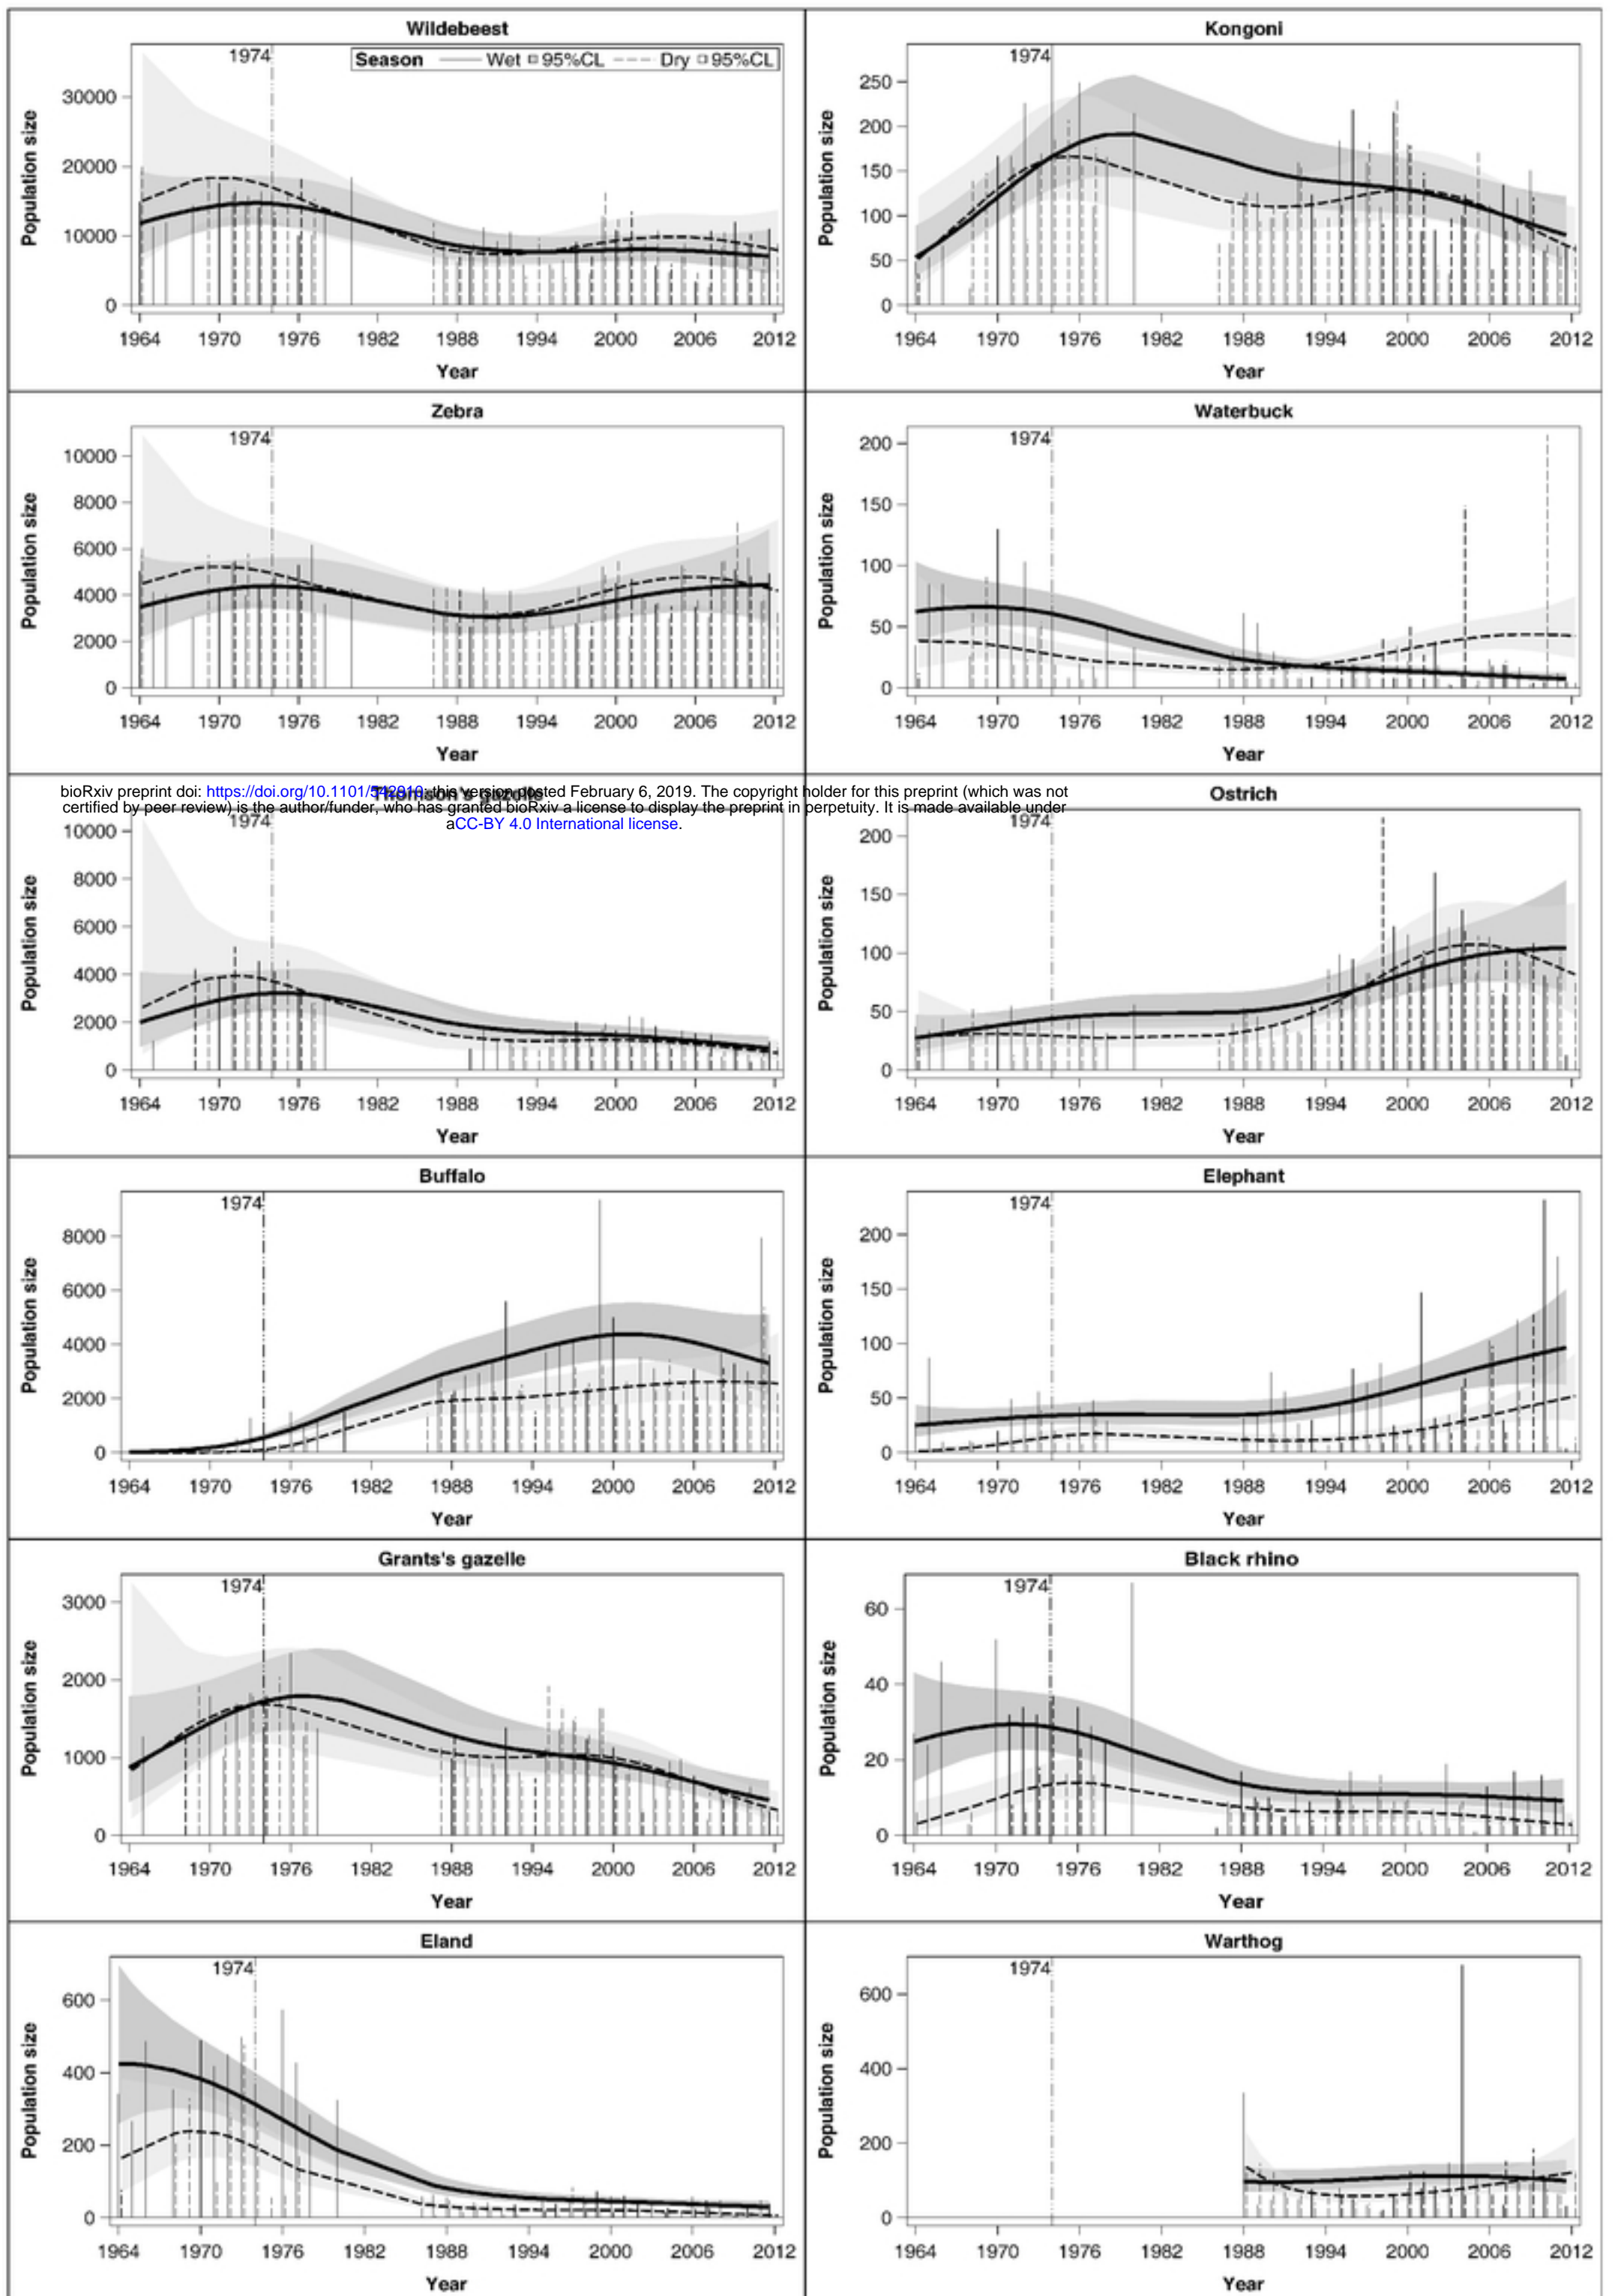



### Biomass in the wet season

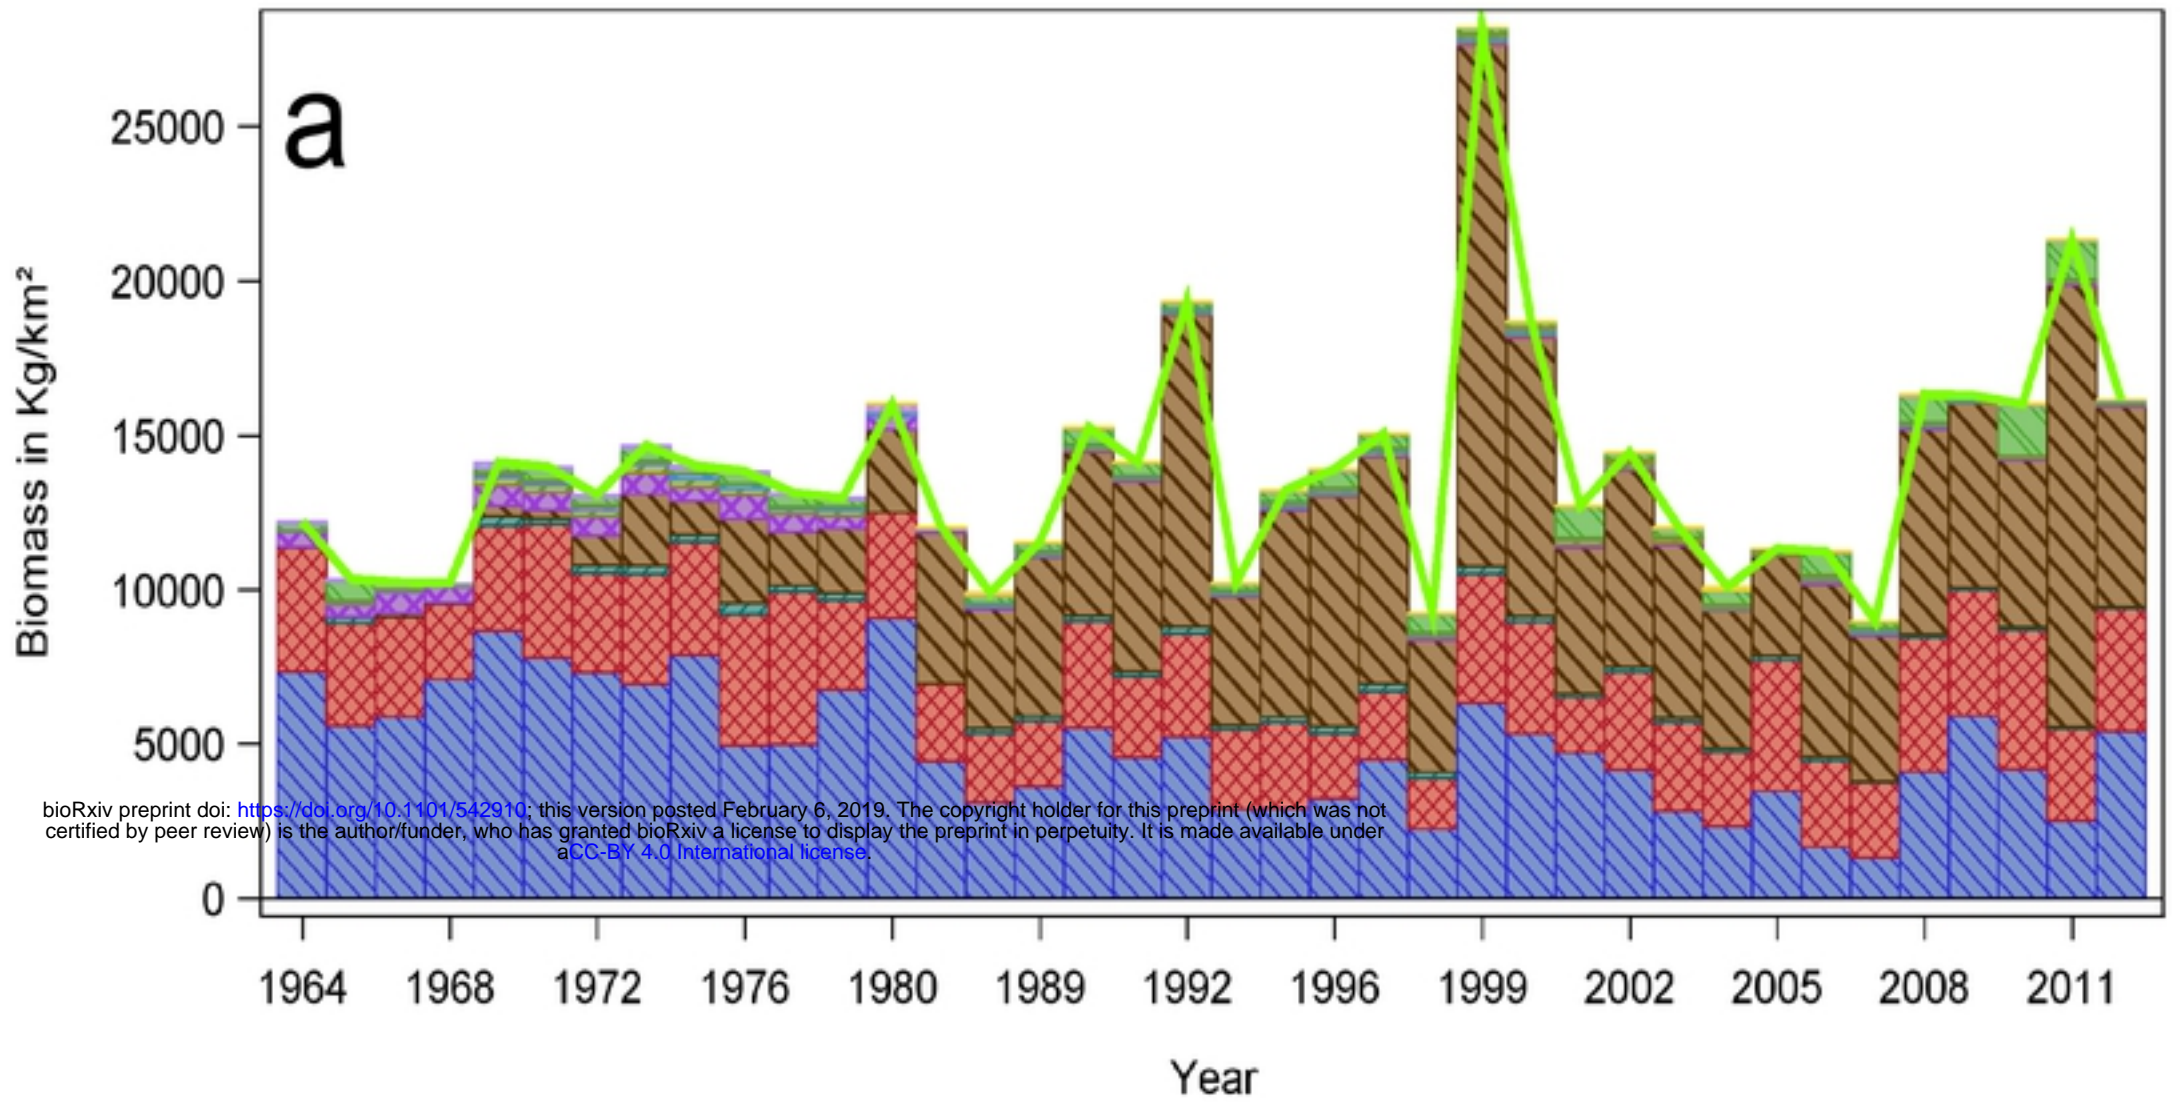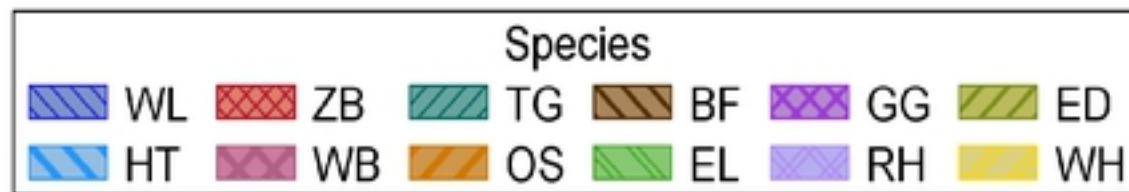

### Biomass in the dry season

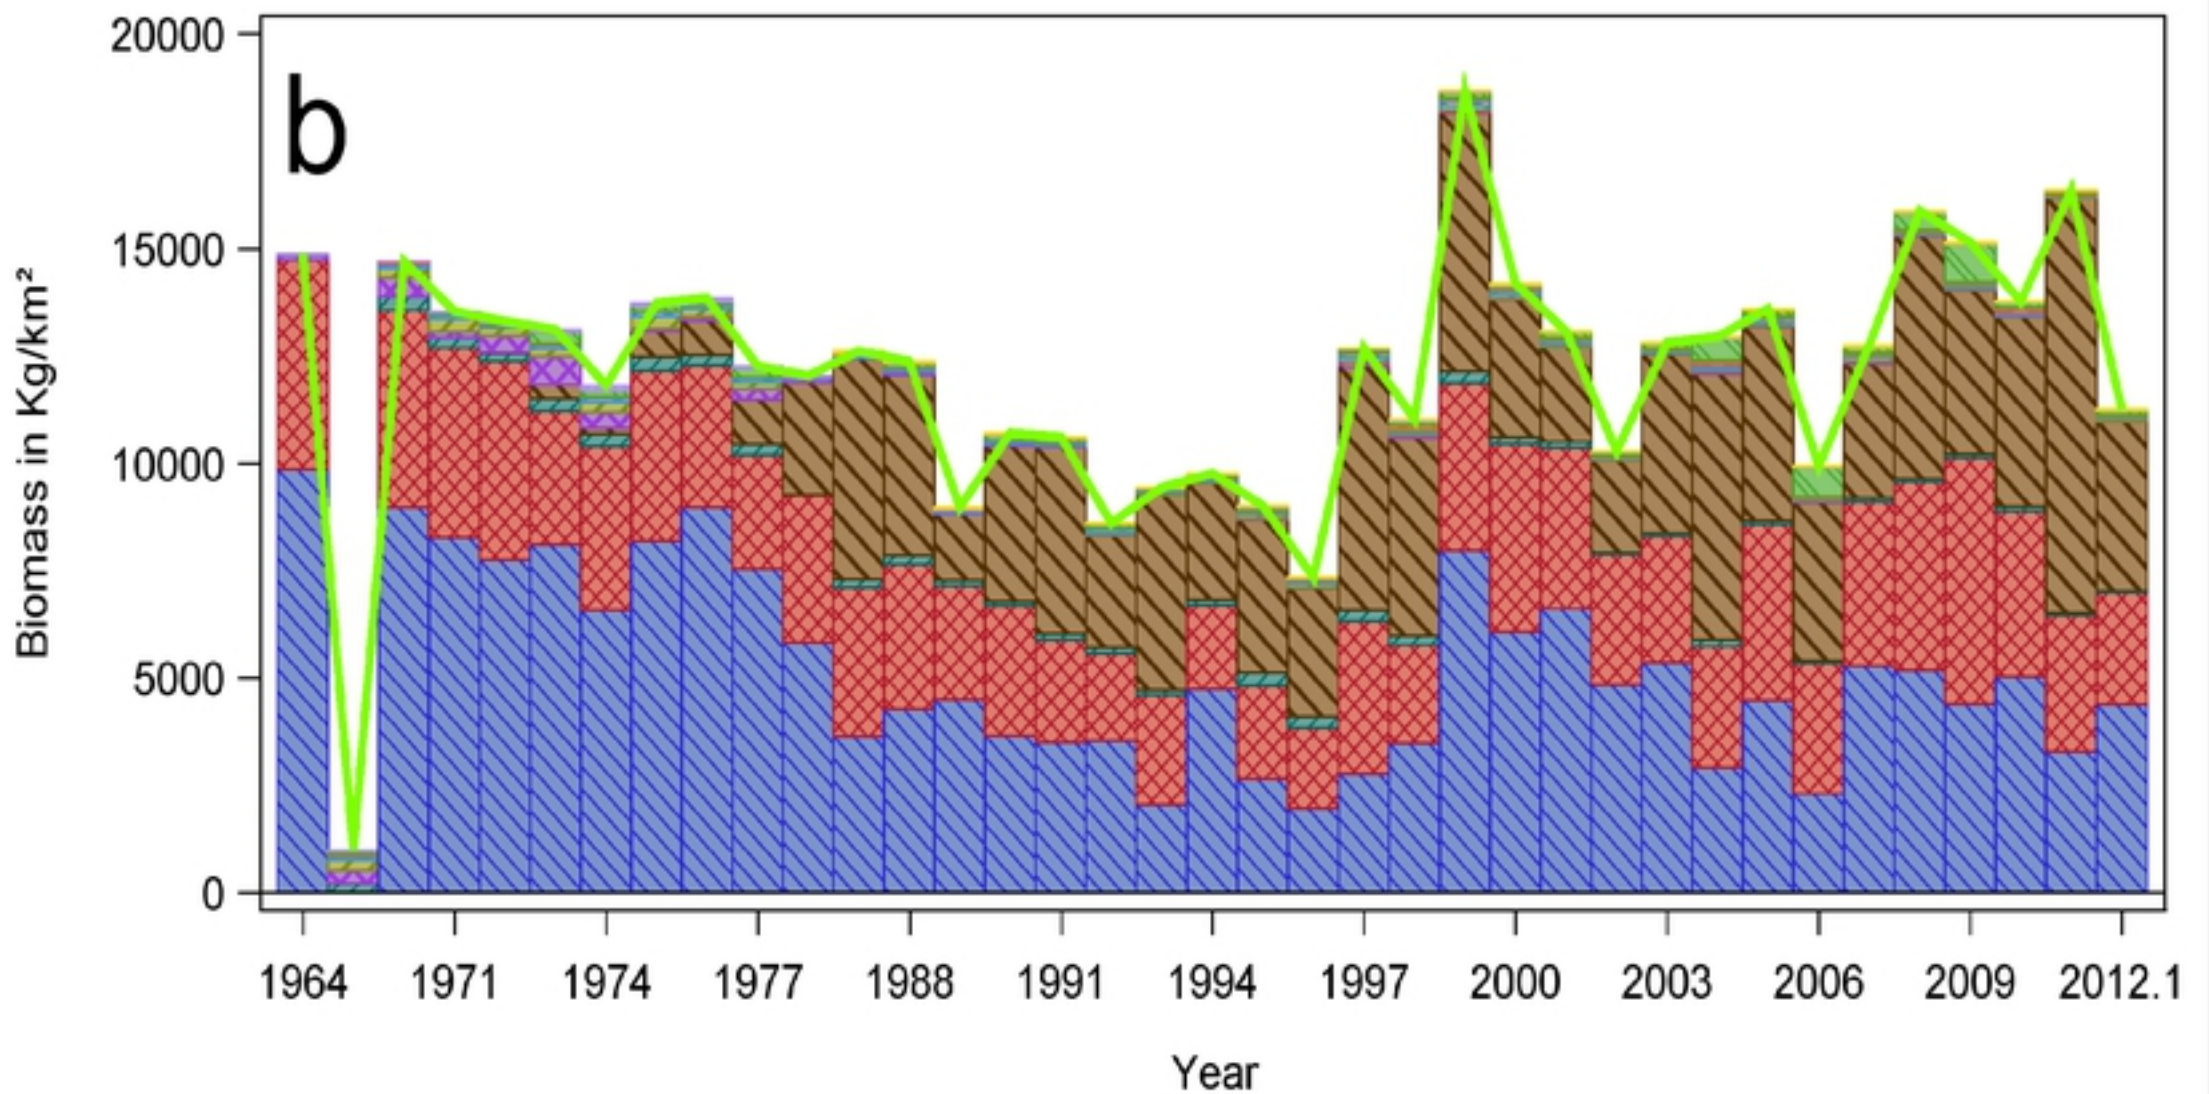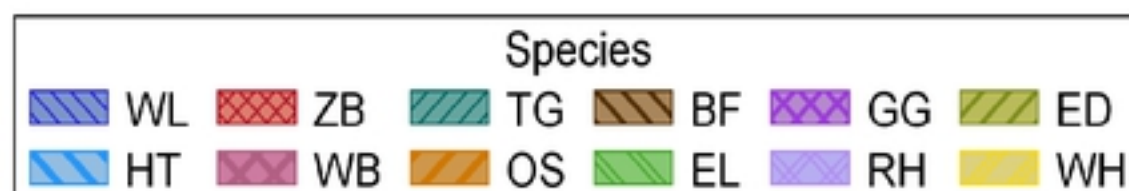



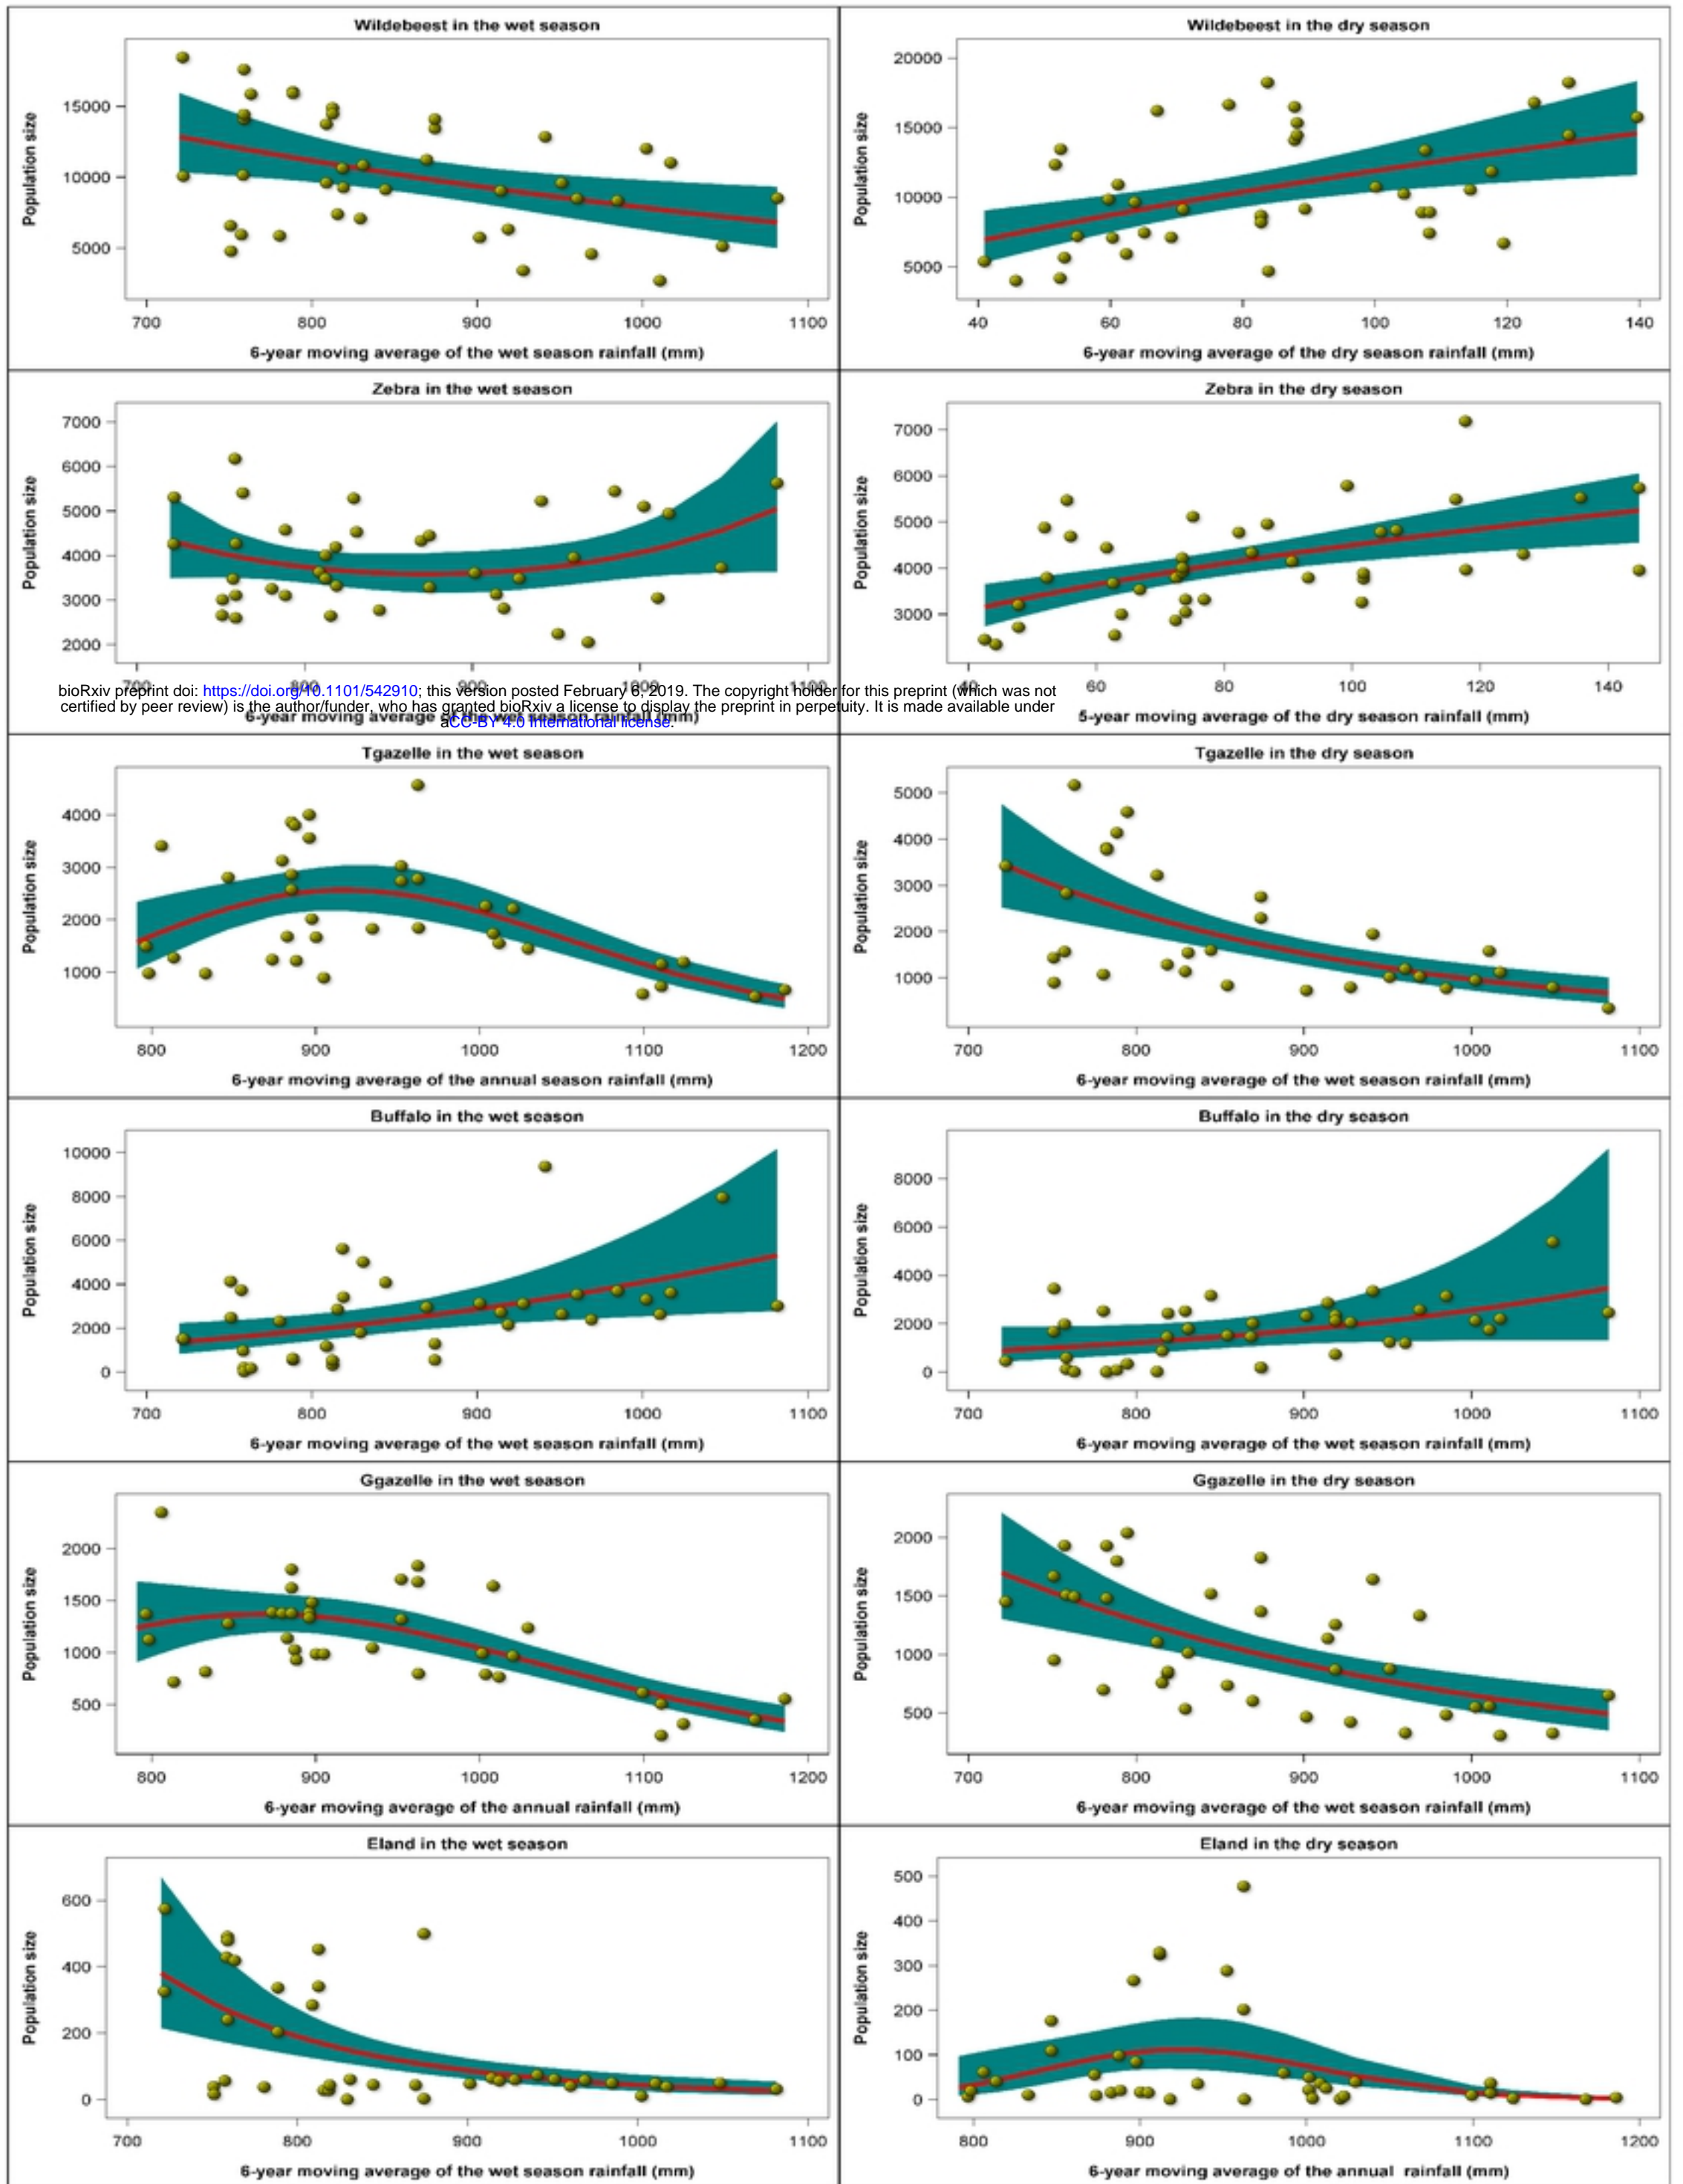

bioRxiv preprint doi: <https://doi.org/10.1101/542910>; this version posted February 6, 2019. The copyright holder for this preprint (which was not certified by peer review) is the author/funder, who has granted bioRxiv a license to display the preprint in perpetuity. It is made available under aCC-BY 4.0 International license.

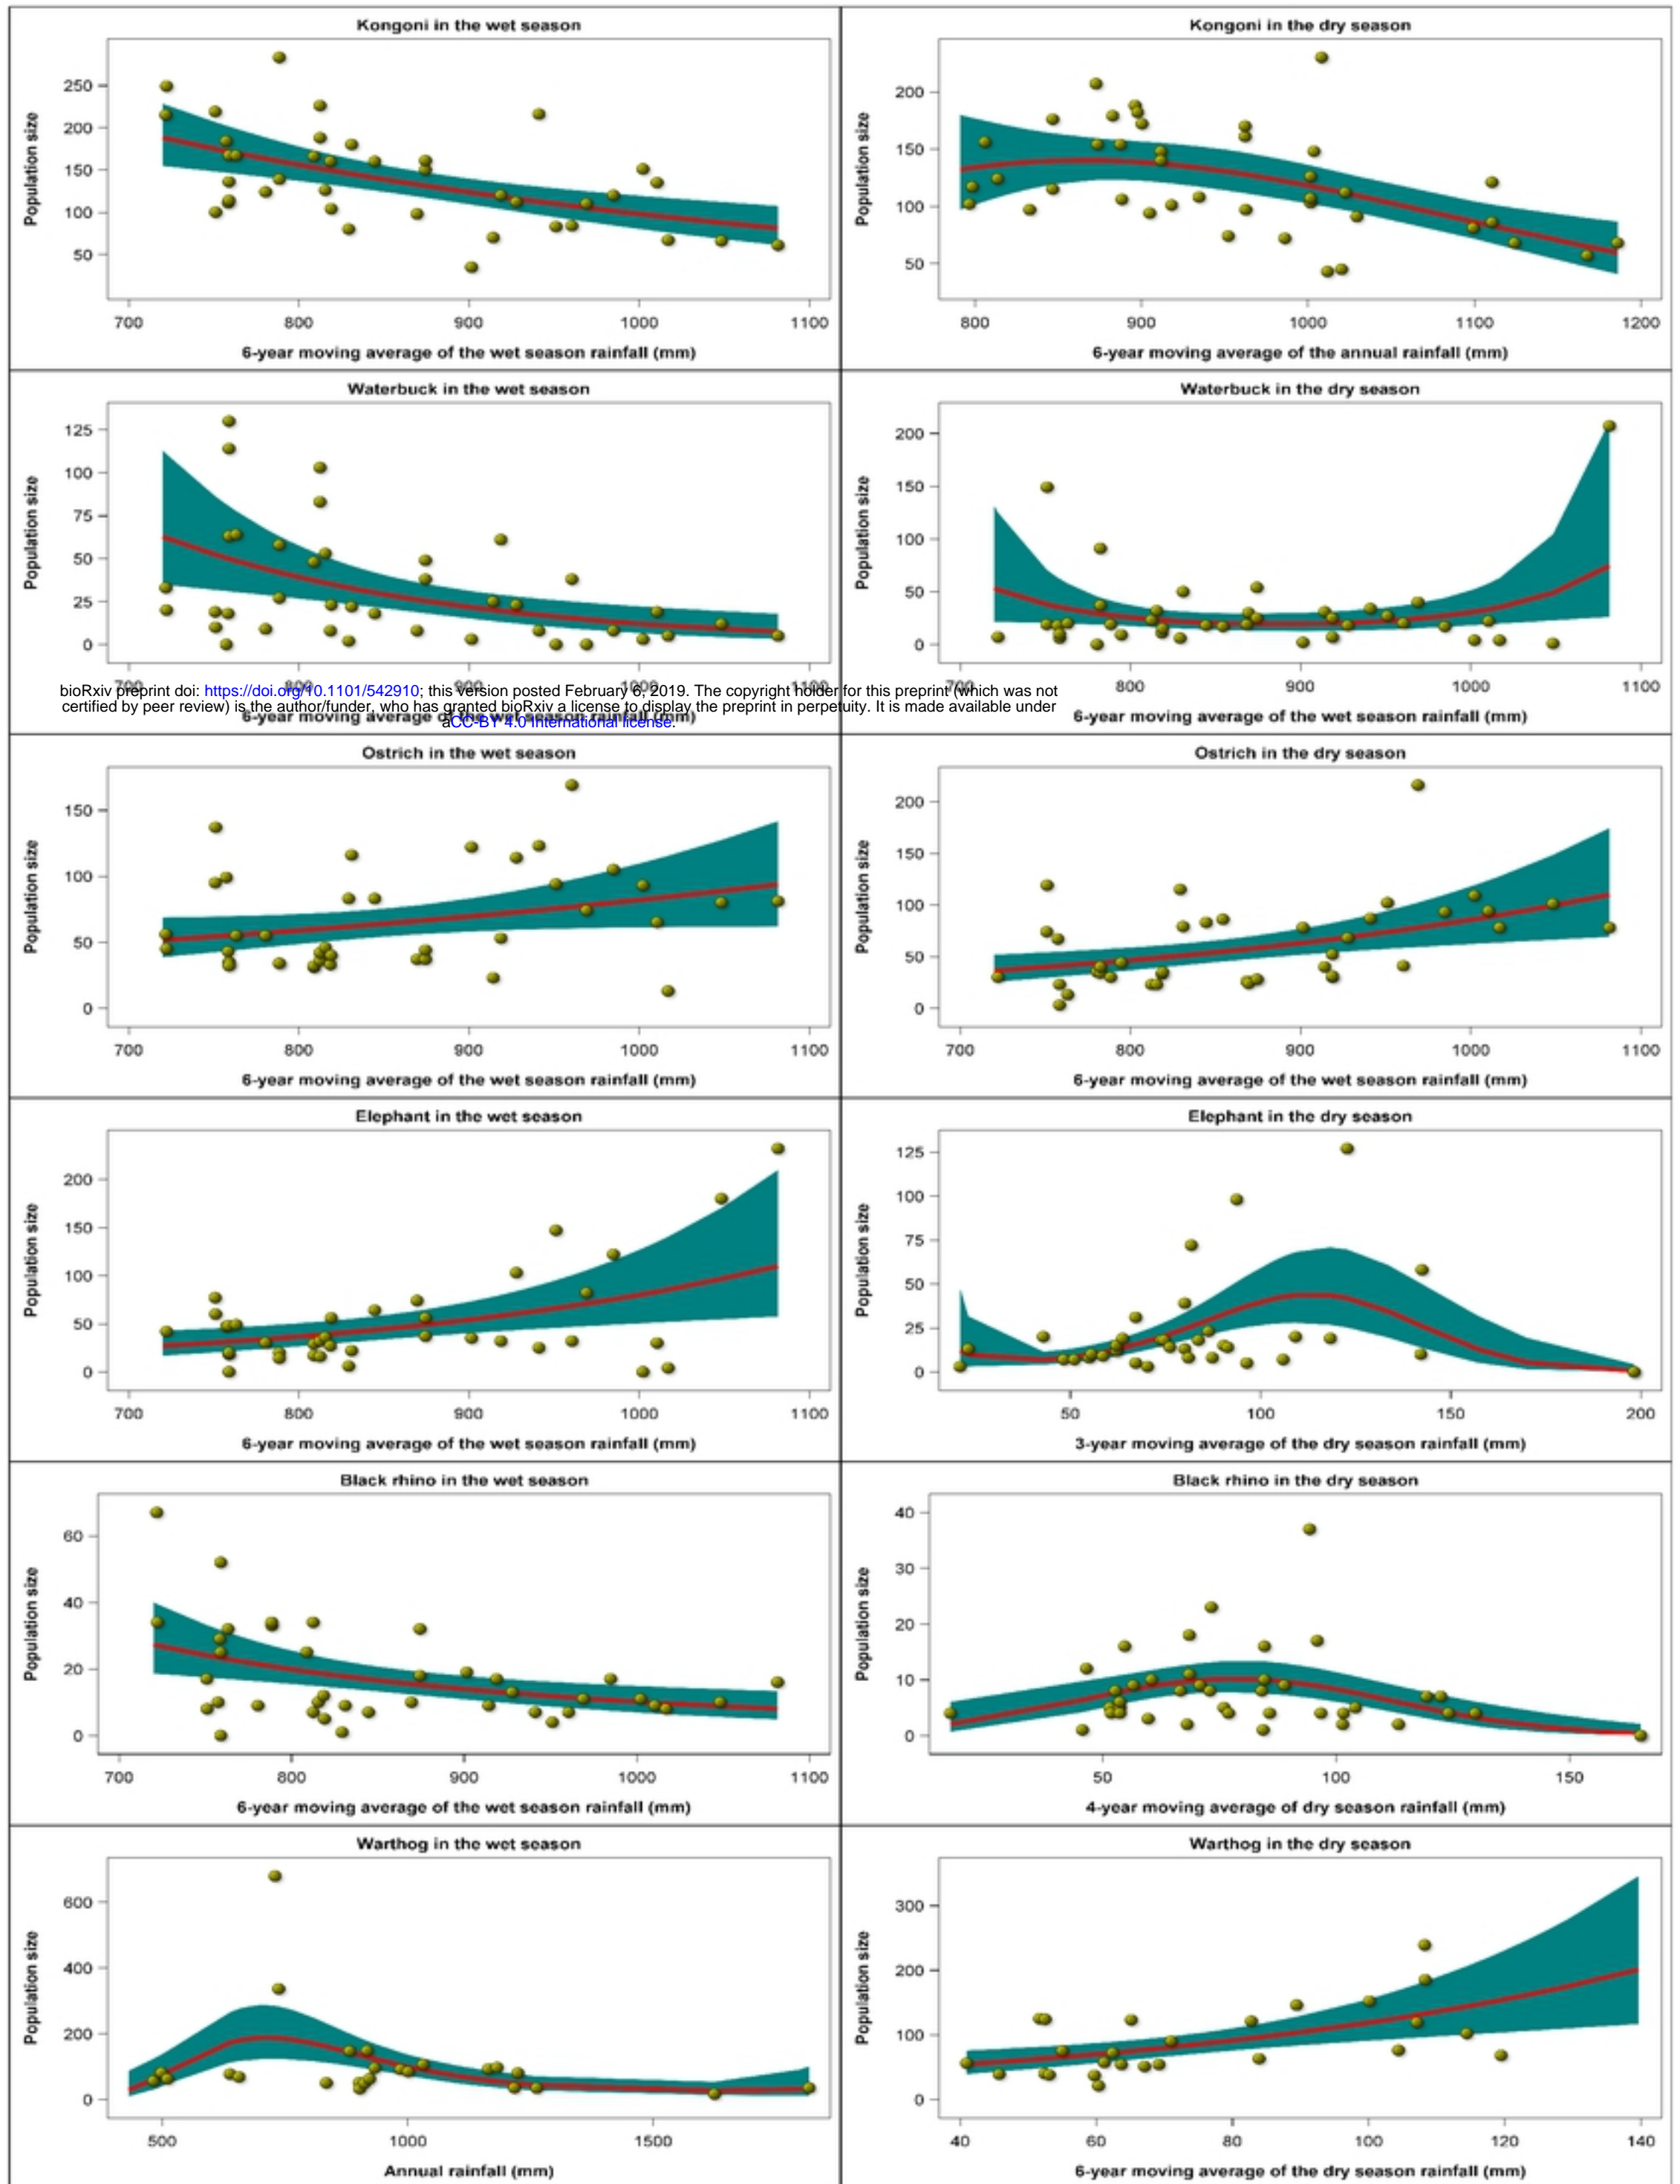

bioRxiv preprint doi: <https://doi.org/10.1101/542910>; this version posted February 6, 2019. The copyright holder for this preprint (which was not certified by peer review) is the author/funder, who has granted bioRxiv a license to display the preprint in perpetuity. It is made available under aCC-BY 4.0 International license.



# Forecasting Buffalo population size in relation to rainfall

bioRxiv preprint doi: <https://doi.org/10.1101/542910>; this version posted February 6, 2019. The copyright holder for this preprint (which was not certified by peer review) is the author/funder, who has granted bioRxiv a license to display the preprint in perpetuity. It is made available under aCC-BY 4.0 International license.

LN(Buffalo Population Size +1)

10.0  
7.5  
5.0  
2.5  
0.0  
10.0  
7.5  
5.0  
2.5  
0.0

1975 2000 2025 2050 2075 2100

Year

Wet

Dry

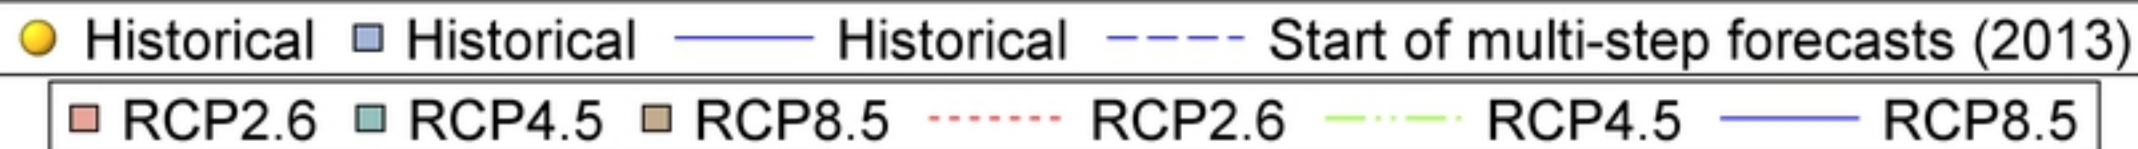

# Forecasting wildebeest population size in relation to rainfall

bioRxiv preprint doi: <https://doi.org/10.1101/542910>; this version posted February 6, 2019. The copyright holder for this preprint (which was not certified by peer review) is the author/funder, who has granted bioRxiv a license to display the preprint in perpetuity. It is made available under aCC-BY 4.0 International license.

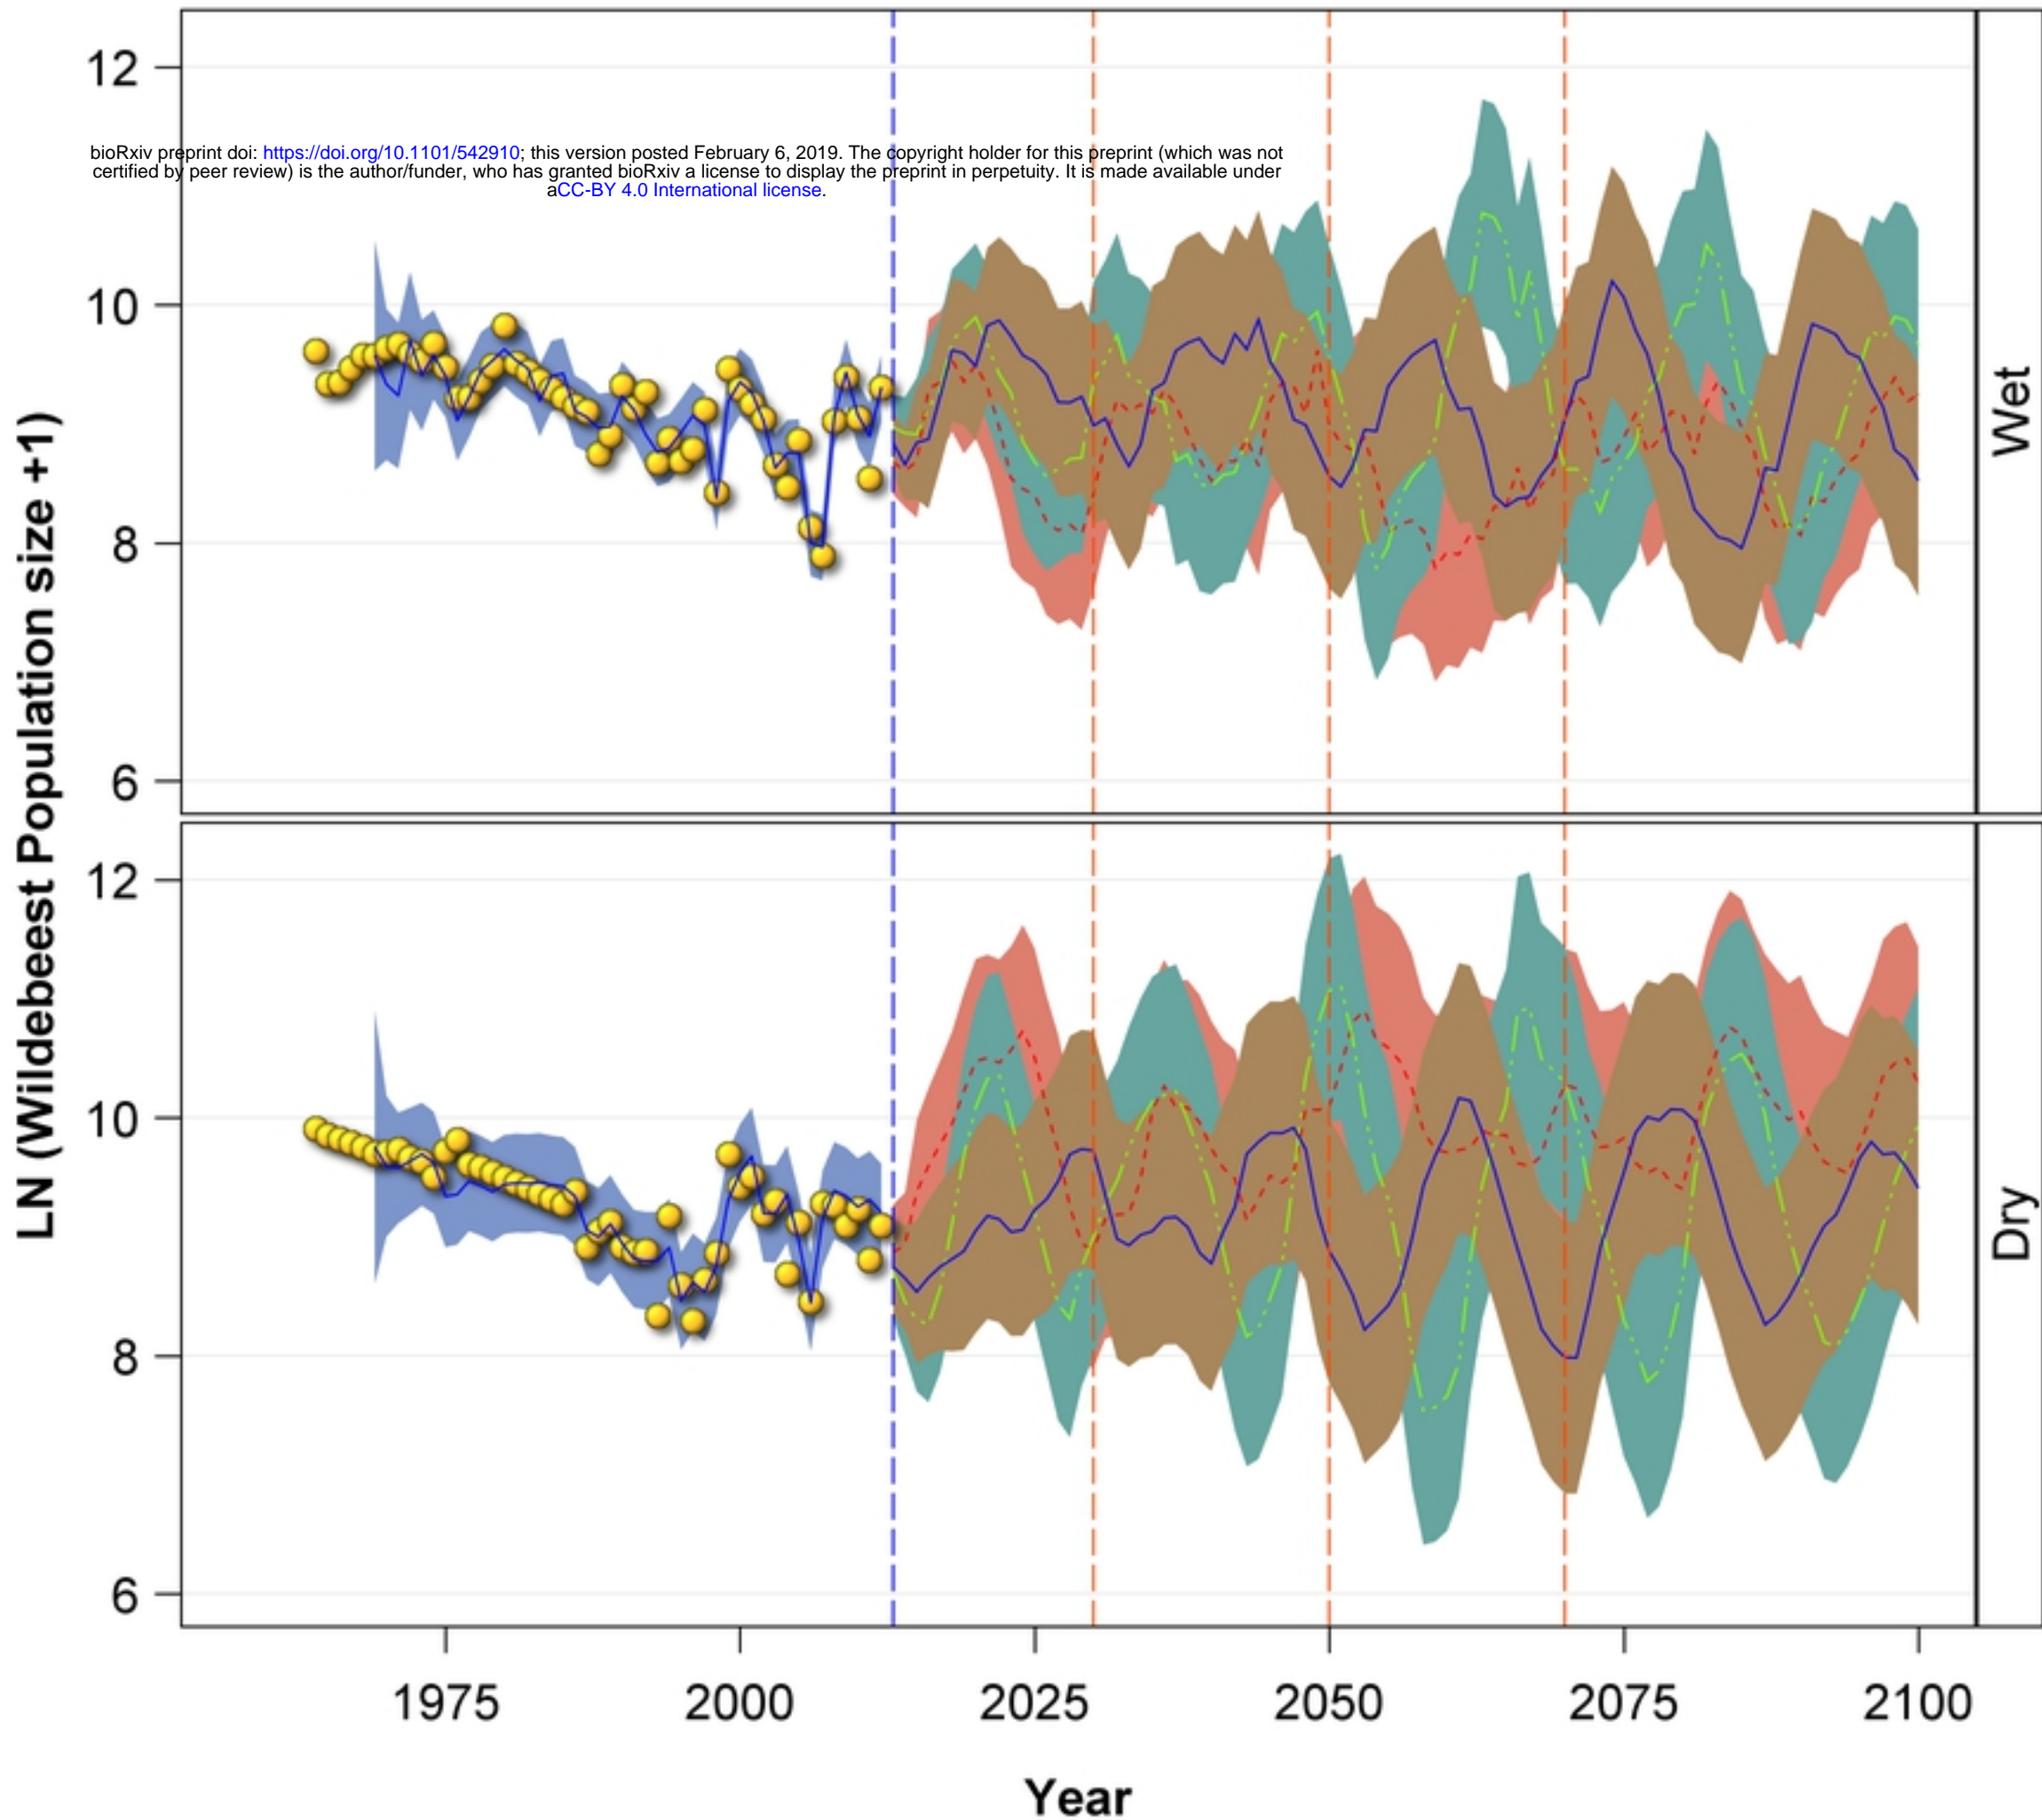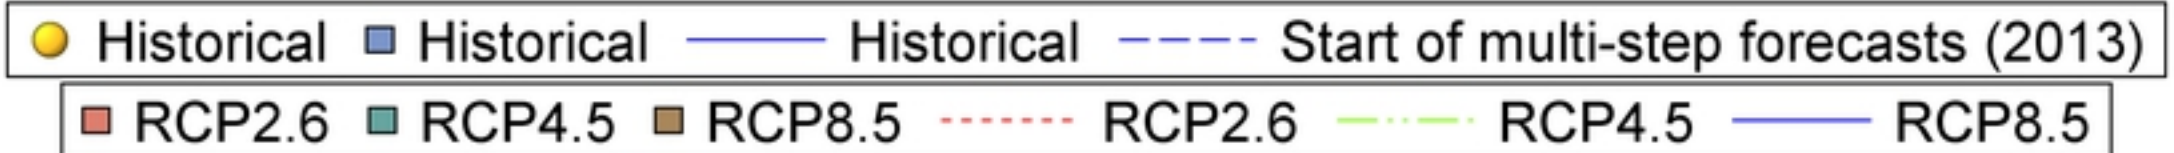



# Forecasting Zebra population size in relation to rainfall

bioRxiv preprint doi: <https://doi.org/10.1101/542910>; this version posted February 6, 2019. The copyright holder for this preprint (which was not certified by peer review) is the author/funder, who has granted bioRxiv a license to display the preprint in perpetuity. It is made available under aCC-BY 4.0 International license.

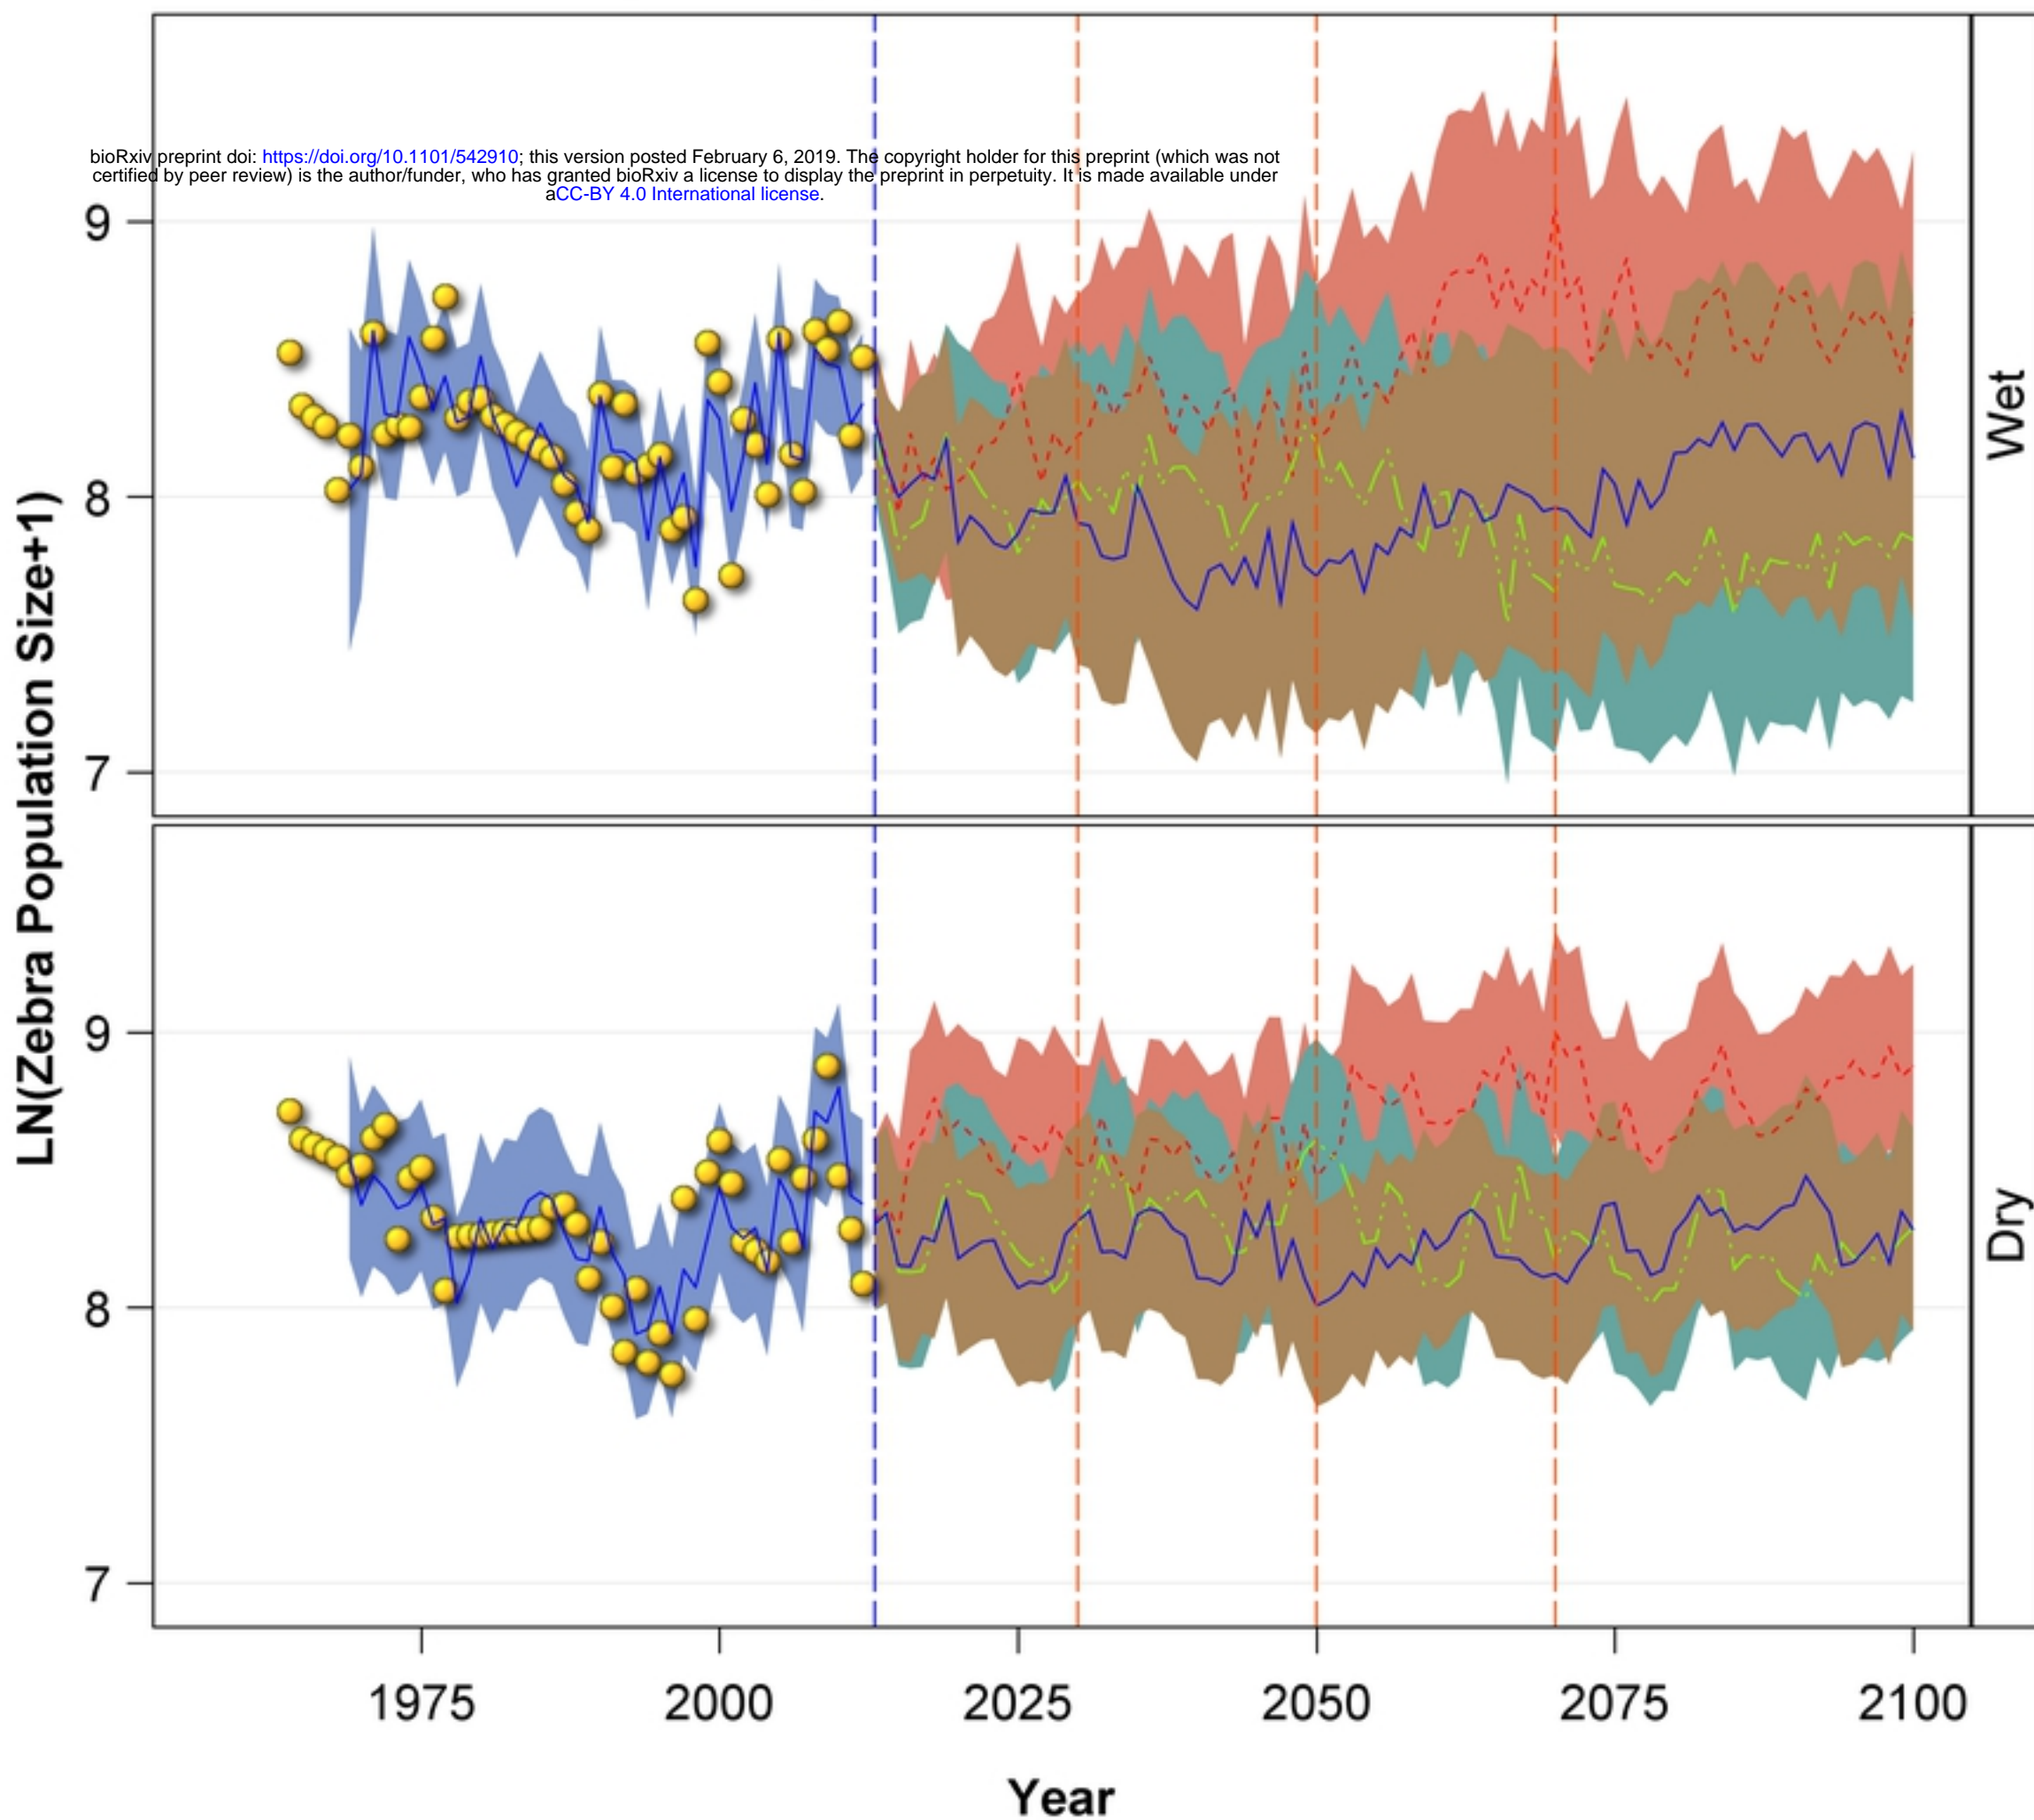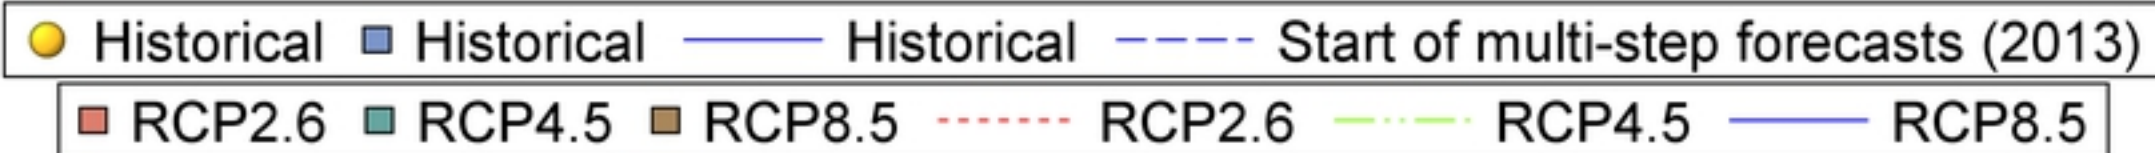



# Forecasting Thomson's gazelle population size in relation to rainfall

bioRxiv preprint doi: <https://doi.org/10.1101/542910>; this version posted February 6, 2019. The copyright holder for this preprint (which was not certified by peer review) is the author/funder, who has granted bioRxiv a license to display the preprint in perpetuity. It is made available under aCC-BY 4.0 International license.

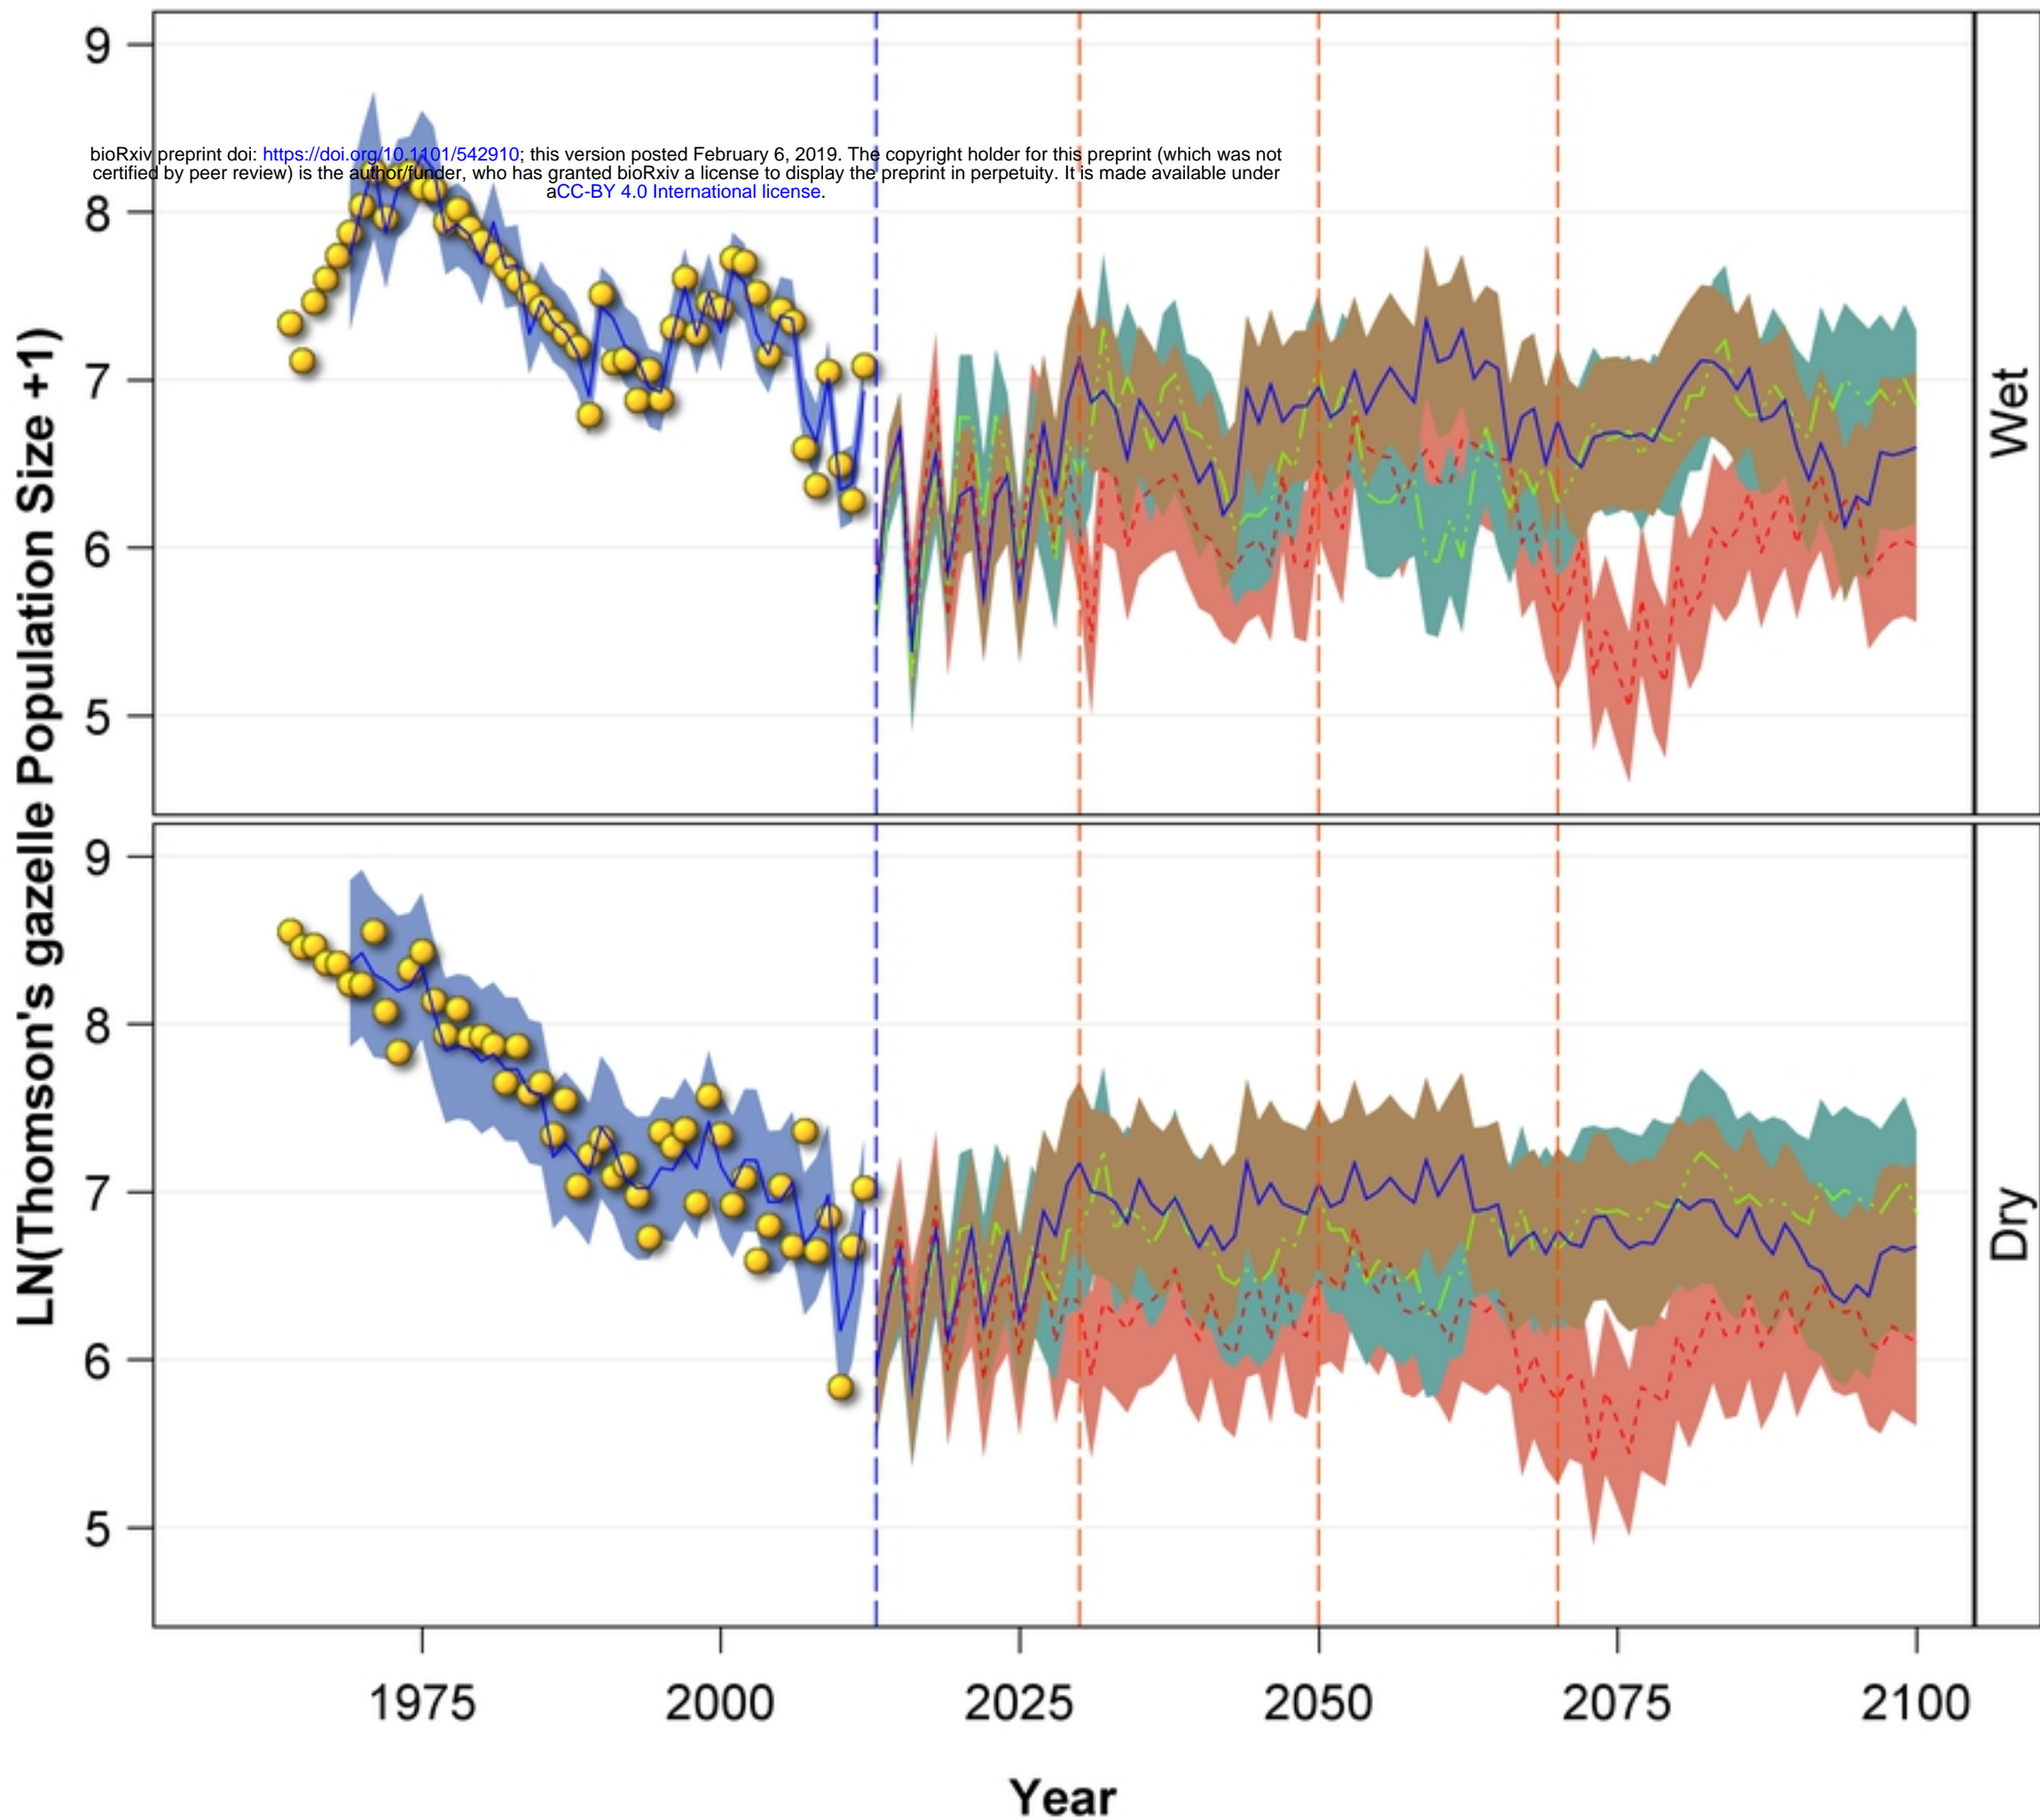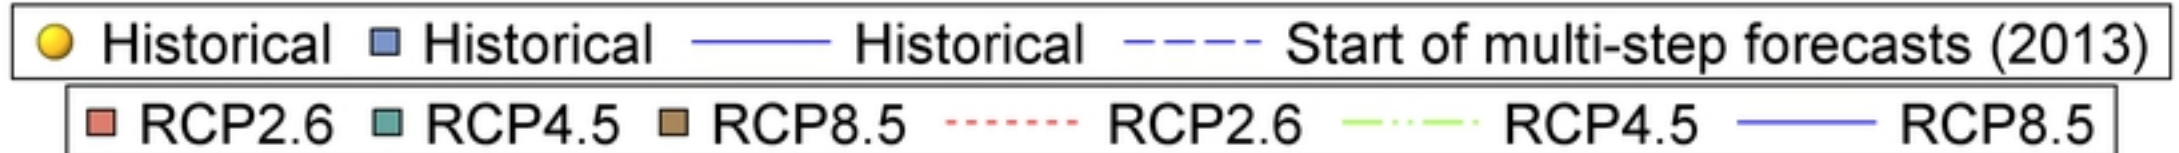

Forecasting Grant's gazelle population size in relation to rainfall

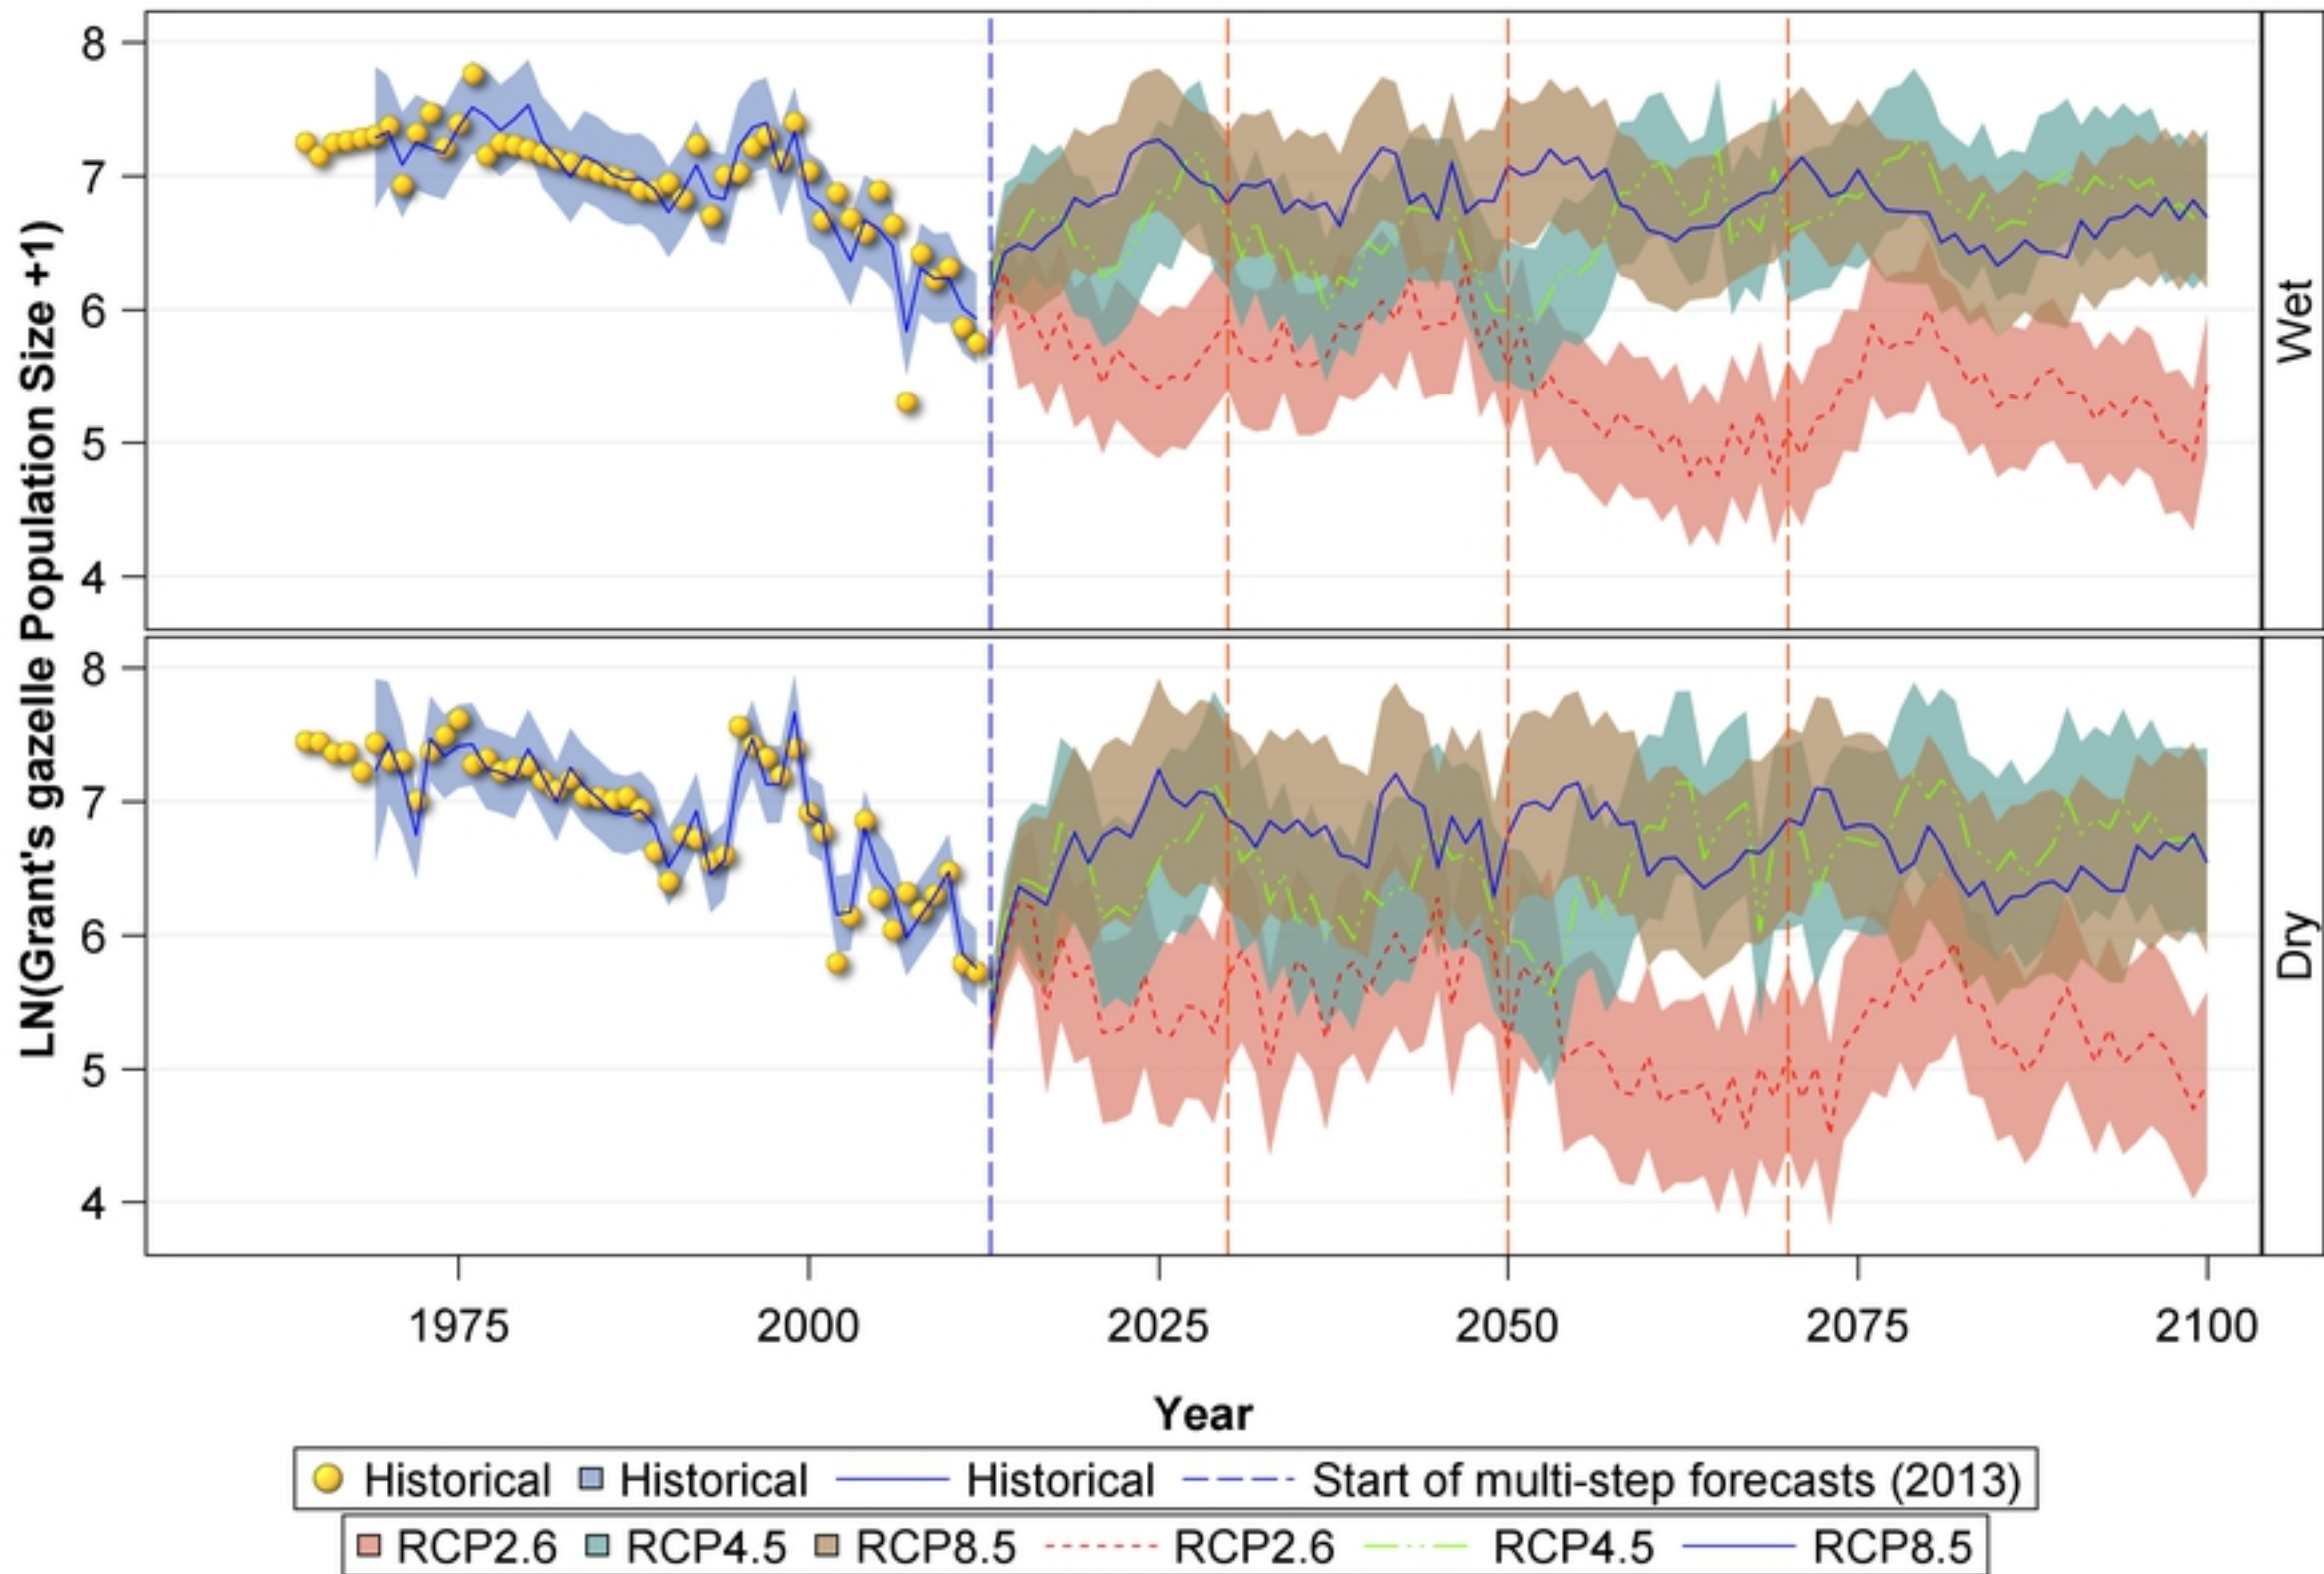

Source: https://www.biorxiv.org/content/10.1101/542910v1.full.pdf
